# Supplementary material
Source: publisher figshare collection journal article supplement (https://acs.figshare.com/ndownloader/files/20760918)
Supplement: Supplementary file 1 [file 20760918]

## **Supporting Information**

### **Intermolecular Reductive Heck Reaction of Unactivated Aliphatic**

#### **Alkenes with Organohalides**

Kewang Zheng,<sup>†</sup> Guanlin Xiao,<sup>†</sup> Tao Guo,<sup>†</sup> Yalan Ding,<sup>†</sup> Chengdong Wang,<sup>†</sup> Teck-Peng Loh<sup>†‡\*</sup> and Xiaojin Wu<sup>†\*</sup>

<sup>†</sup> Institute of Advanced Synthesis, School of Chemistry and Molecular Engineering, Jiangsu National Synergetic Innovation Center for Advanced Materials, Nanjing Tech University, Nanjing 211816, P. R. China

<sup>‡</sup> Division of Chemistry and Biological Chemistry, School of Physical and Mathematical Sciences, Nanyang Technological University, Singapore 637616

#### **Table of Contents**

I. General

II. Condition optimization for the model reductive Heck reaction

III. Synthesis of alkene substrates

IV. Pd-catalyzed intermolecular reductive Heck reaction of various organohalides

V. Pd-catalyzed intermolecular reductive Heck reaction of various alkenes

VI. Amplification reaction and drug synthesis

VII. Mechanistic Study

VIII. Reference

## I. General

$^1\text{H}$  NMR spectra were acquired on Bruker 400 MHz or Jeol 400 MHz spectrometers and chemical shifts were recorded relative to tetramethylsilane ( $\delta$  0.00) or residual protiated solvent ( $\text{CDCl}_3$ ;  $\delta$  7.26). Multiplicities were given as: s (singlet), d (doublet), t (triplet), q (quartet) and m (multiplet). The number of protons (n) for a given resonance was indicated by nH. Coupling constants were reported as a  $J$  value in Hz.  $^{13}\text{C}$  NMR spectra were obtained at 100 MHz on 400 MHz instruments and chemical shifts were recorded relative to solvent resonance ( $\text{CDCl}_3$ ;  $\delta$  77.16). Proof of purity of new compounds was demonstrated with copies of  $^1\text{H}$ ,  $^{13}\text{C}$  and  $^{19}\text{F}$  NMR spectra.

Glassware was dried in an oven at 120°C for at least 2h before use. Dry 2,3-butanediol was freshly distilled from calcium oxide under argon before use. Unless noted otherwise, commercially available chemicals were used without further purification. The GC standard, *n*-dodecane was degassed with argon bubbling and dried over activated 4 Å molecular sieve beads for a few days in the glove box before use.

Thin-layer chromatography (TLC) was conducted with Merck 60 F254 coated silica gel plate (0.2 mm thickness). Flash chromatography was performed using Merck silica gel 60 (0.040-0.063 mm) or SiliCycle silica gel F60 (0.040-0.063 mm). The dilute solvents usually used Ethyl Acetate/Petroleum Ether, which was abbreviated as EA/PE.

GCMS analysis was conducted on a Thermo Scientific DSQ II single quadrupole GC/MS instrument with Agilent J&W GC column DB-5MS-UI. ESI/MS analysis was conducted on a ThermoFinnigan LCQ Fleet MS spectrometer.

## II. Condition optimization for the Model Reductive Heck Reaction

*Typical procedure for condition optimization:* In an argon atmosphere, a dry 10-mL Schlenk tube containing a magnetic stirbar was charged with [PdCl(C<sub>3</sub>H<sub>5</sub>)<sub>2</sub>] (5 mol%, 1.9 mg, 0.005 mmol), cataCXium®PCy (10 mol%, 3.4 mg, 0.01 mmol), alkenes (1 equiv, 0.1 mmol, 21.2 mg), LiOAc (3 equiv, 0.3 mmol, 19.8 mg), 4-bromotoluene (1.5 equiv, 0.15 mmol, 44.7 mg), dry 2,3-butanediol (1.0 mL), cyanoacetic acid (3 equiv, 0.3 mmol, 25.6 mg) and H<sub>2</sub>O (20 equiv, 2 mmol, 36 uL) sequentially. The tube was capped tightly and the mixture was vigorously stirred in a *pre*-warmed 130°C oil bath. Cooling after 12 h, 10 uL dodecane was added in the tube. After filtering, the filtrate was subjected to GC analysis to determine the conversion of alkenes and ArBr, calibrated GC yield of the coupling product. The major byproducts from alkene are the mixture of isomerized cis/trans alkenes.

**Table S1 Effect of supporting ligands for Pd catalysts**

| <div style="display: flex; align-items: center; justify-content: center;"> <div style="text-align: center; margin-right: 10px;"> <math>\text{ArBr}</math><br/>1.5 equiv<br/>S1         </div> <div style="text-align: center; margin-right: 10px;">+</div> <div style="text-align: center; margin-right: 10px;"> <math>\text{AQ}-\text{CH}(\alpha)=\text{CH}(\beta)-\text{CH}_2(\gamma)</math><br/>1.0 equiv<br/>S2         </div> <div style="text-align: center; margin-right: 10px;"> <math>\xrightarrow[\text{3 equiv LiOAc, NCCH}_2\text{CO}_2\text{H/H}_2\text{O (3:20), 2,3\text{-Butanediol, 130 }^\circ\text{C}}]{[\text{PdCl}(\text{C}_3\text{H}_5)_2]_2 \text{ (5 mol\%)} \text{ Ligand (10 mol\%)}}</math> </div> <div style="text-align: center; margin-right: 10px;"> <math>\text{AQ}-\text{CH}(\alpha)-\text{CH}(\beta)-\text{CH}_2(\gamma)-\text{Ar}</math> </div> <div style="border-left: 1px dashed black; padding-left: 10px; margin-left: 10px;"> <math>\text{AQ} = </math> 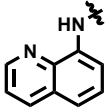 </div> </div> |                                            |                     |                       |           |
|------------------------------------------------------------------------------------------------------------------------------------------------------------------------------------------------------------------------------------------------------------------------------------------------------------------------------------------------------------------------------------------------------------------------------------------------------------------------------------------------------------------------------------------------------------------------------------------------------------------------------------------------------------------------------------------------------------------------------------------------------------------------------------------------------------------------------------------------------------------------------------------------------------------------------------------------------------------------------------------------------------------------------------------------------------------------------------------------------|--------------------------------------------|---------------------|-----------------------|-----------|
| $(\text{Ar} = \textit{para}\text{-tolyl})$                                                                                                                                                                                                                                                                                                                                                                                                                                                                                                                                                                                                                                                                                                                                                                                                                                                                                                                                                                                                                                                           |                                            |                     |                       |           |
| Entry                                                                                                                                                                                                                                                                                                                                                                                                                                                                                                                                                                                                                                                                                                                                                                                                                                                                                                                                                                                                                                                                                                | Ligand                                     | ArBr/Conversion (%) | Alkene/Conversion (%) | Yield (%) |
| 1                                                                                                                                                                                                                                                                                                                                                                                                                                                                                                                                                                                                                                                                                                                                                                                                                                                                                                                                                                                                                                                                                                    | NO                                         | 17                  | 100                   | 16        |
| 2                                                                                                                                                                                                                                                                                                                                                                                                                                                                                                                                                                                                                                                                                                                                                                                                                                                                                                                                                                                                                                                                                                    | <i>n</i> Bu <sub>3</sub> PHBF <sub>4</sub> | 98                  | 100                   | 59        |
| 3                                                                                                                                                                                                                                                                                                                                                                                                                                                                                                                                                                                                                                                                                                                                                                                                                                                                                                                                                                                                                                                                                                    | PCy <sub>3</sub> HBF <sub>4</sub>          | 95                  | 100                   | 55        |
| 4                                                                                                                                                                                                                                                                                                                                                                                                                                                                                                                                                                                                                                                                                                                                                                                                                                                                                                                                                                                                                                                                                                    | <i>t</i> Bu <sub>3</sub> PHBF <sub>4</sub> | 99                  | 100                   | 44        |
| 5                                                                                                                                                                                                                                                                                                                                                                                                                                                                                                                                                                                                                                                                                                                                                                                                                                                                                                                                                                                                                                                                                                    | Cy-Johnphos                                | 94                  | 100                   | 66        |
| 6                                                                                                                                                                                                                                                                                                                                                                                                                                                                                                                                                                                                                                                                                                                                                                                                                                                                                                                                                                                                                                                                                                    | Brettphos                                  | 98                  | 100                   | 73        |
| 7                                                                                                                                                                                                                                                                                                                                                                                                                                                                                                                                                                                                                                                                                                                                                                                                                                                                                                                                                                                                                                                                                                    | X-phos                                     | 99                  | 100                   | 74        |
| 8                                                                                                                                                                                                                                                                                                                                                                                                                                                                                                                                                                                                                                                                                                                                                                                                                                                                                                                                                                                                                                                                                                    | Davephos                                   | 78                  | 100                   | 45        |
| <b>9</b>                                                                                                                                                                                                                                                                                                                                                                                                                                                                                                                                                                                                                                                                                                                                                                                                                                                                                                                                                                                                                                                                                             | <b>cataCXium®PCy</b>                       | <b>98</b>           | <b>100</b>            | <b>88</b> |
| 10                                                                                                                                                                                                                                                                                                                                                                                                                                                                                                                                                                                                                                                                                                                                                                                                                                                                                                                                                                                                                                                                                                   | cataCXium® <sup>2</sup> PoMely             | 98                  | 100                   | 87        |
| 11                                                                                                                                                                                                                                                                                                                                                                                                                                                                                                                                                                                                                                                                                                                                                                                                                                                                                                                                                                                                                                                                                                   | cataCXium®RPICy                            | 98                  | 100                   | 80        |

|    |                  |    |     |    |
|----|------------------|----|-----|----|
| 12 | cataCXium®RPINCy | 97 | 100 | 86 |
| 13 | DPPP             | 97 | 100 | 6  |
| 14 | Xantphos         | 99 | 100 | 44 |

**Table S2 Effect of Pd Sources**

1.5 equiv S1      1.0 equiv S2      (Ar = *para*-tolyl)

| Entry | Cat.                                                 | ArBr/Conversion (%) | Alkene/Conversion (%) | Yield (%) |
|-------|------------------------------------------------------|---------------------|-----------------------|-----------|
| 1     | NO                                                   | <10                 | 98 <sup>a</sup>       | -         |
| 2     | Pd(OAc) <sub>2</sub>                                 | 60                  | 100                   | 51        |
| 3     | PdCl <sub>2</sub>                                    | 99                  | 100                   | 65        |
| 4     | Pd(acac) <sub>2</sub>                                | 73                  | 100                   | 66        |
| 5     | Pd(hfacac) <sub>2</sub>                              | 94                  | 100                   | 72        |
| 6     | Pd(CF <sub>3</sub> COO) <sub>2</sub>                 | 85                  | 100                   | 67        |
| 7     | Pd <sub>2</sub> (dba) <sub>3</sub>                   | 96                  | 100                   | 69        |
| 8     | Pd(dba) <sub>2</sub>                                 | 96                  | 100                   | 53        |
| 9     | [PdCl(C <sub>3</sub> H <sub>5</sub> ) <sub>2</sub> ] | 98                  | 100                   | 88        |

<sup>a</sup> Alkene (S2) was isomerized to conjugated alkene in 90% yield.

**Table S3 Effect of Bases**

1.5 equiv S1      1.0 equiv S2      (Ar = *para*-tolyl)

| Entry | Base  | ArBr/Conversion (%) | Alkene/Conversion (%) | Yield (%) |
|-------|-------|---------------------|-----------------------|-----------|
| 1     | NO    | -                   | 70                    | -         |
| 2     | LiOAc | 98                  | 100                   | 88        |
| 3     | NaOAc | 88                  | 100                   | 86        |

|    |                                 |     |     |    |
|----|---------------------------------|-----|-----|----|
| 4  | KOAc                            | 99  | 100 | 86 |
| 5  | Li <sub>2</sub> CO <sub>3</sub> | 67  | 100 | 10 |
| 6  | <sup>t</sup> BuOLi              | 85  | 100 | 10 |
| 7  | K <sub>2</sub> CO <sub>3</sub>  | 100 | 100 | 5  |
| 8  | HCOONa                          | 100 | 100 | 58 |
| 9  | PS                              | -   | 49  | -  |
| 10 | DIPEA                           | 41  | 100 | 5  |
| 11 | Et <sub>3</sub> N               | 38  | 100 | 3  |
| 12 | DABCO                           | 100 | 100 | 3  |
| 13 | Cy <sub>2</sub> NMe             | 52  | 100 | 4  |

**Table S4 Effect of Acids**

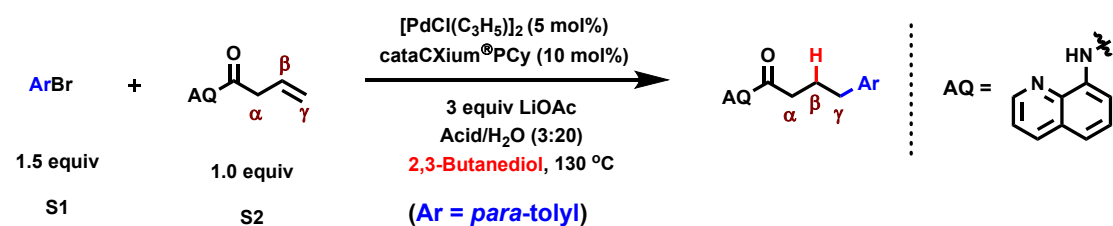

| Entry    | Acid                              | ArBr/Conversion (%) | Alkene/Conversion (%) | Yield (%) |
|----------|-----------------------------------|---------------------|-----------------------|-----------|
| 1        | No                                | 97                  | 100                   | 85        |
| 2        | HCOOH                             | 99                  | 99                    | 65        |
| 3        | HOAc                              | 83                  | 100                   | 81        |
| 4        | TFA                               | 19                  | 71                    | 17        |
| <b>5</b> | <b>NCCH<sub>2</sub>COOH</b>       | <b>98</b>           | <b>100</b>            | <b>88</b> |
| 6        | COOHCH <sub>2</sub> COOH          | 15                  | 55                    | 12        |
| 7        | <sup>t</sup> PrCOOH               | 75                  | 100                   | 85        |
| 8        | <sup>t</sup> BuCOOH               | 97                  | 99                    | 83        |
| 9        | PhCOOH                            | 80                  | 100                   | 65        |
| 10       | <i>p</i> - <sup>t</sup> Bu-PhCOOH | 78                  | 100                   | 80        |
| 11       | <i>p</i> -NO <sub>2</sub> -PhCOOH | 60                  | 99                    | 51        |
| 12       | <i>p</i> -CN-PhCOOH               | 65                  | 99                    | 70        |

**Table S5 Effect of Solvents**

| <div style="display: flex; align-items: center; justify-content: space-around;"> <div style="text-align: center;"> <math>\text{ArBr}</math><br/>             1.5 equiv<br/> <b>S1</b> </div> <div style="text-align: center;"> <math>+</math> </div> <div style="text-align: center;"> 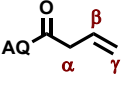<br/>             1.0 equiv<br/> <b>S2</b> </div> <div style="text-align: center;"> <math>\xrightarrow[\text{Solvent, 130 } ^\circ\text{C}]{\begin{array}{l} [\text{PdCl}(\text{C}_3\text{H}_5)]_2 \text{ (5 mol\%)} \\ \text{cataCXium}^\text{®}\text{PCy (10 mol\%)} \\ 3 \text{ equiv LiOAc} \\ \text{NCCH}_2\text{CO}_2\text{H/H}_2\text{O (3:20)} \end{array}}</math> </div> <div style="text-align: center;">  </div> <div style="text-align: center;"> <math>\text{AQ} = </math>  </div> </div> <p style="text-align: center; margin-top: 10px;">(Ar = <i>para</i>-tolyl)</p> |                       |                     |                       |           |
|-----------------------------------------------------------------------------------------------------------------------------------------------------------------------------------------------------------------------------------------------------------------------------------------------------------------------------------------------------------------------------------------------------------------------------------------------------------------------------------------------------------------------------------------------------------------------------------------------------------------------------------------------------------------------------------------------------------------------------------------------------------------------------------------------------------------------------------------------------------------------------------------------------------------------------------------------------------------------------------------------------------------------------------------------------------------------------------------------------------------------------------|-----------------------|---------------------|-----------------------|-----------|
| Entry                                                                                                                                                                                                                                                                                                                                                                                                                                                                                                                                                                                                                                                                                                                                                                                                                                                                                                                                                                                                                                                                                                                             | Solvent               | ArBr/Conversion (%) | Alkene/Conversion (%) | Yield (%) |
| 1                                                                                                                                                                                                                                                                                                                                                                                                                                                                                                                                                                                                                                                                                                                                                                                                                                                                                                                                                                                                                                                                                                                                 | MeOH                  | 74                  | 100                   | 23        |
| 2                                                                                                                                                                                                                                                                                                                                                                                                                                                                                                                                                                                                                                                                                                                                                                                                                                                                                                                                                                                                                                                                                                                                 | EtOH                  | 74                  | 100                   | 70        |
| 3                                                                                                                                                                                                                                                                                                                                                                                                                                                                                                                                                                                                                                                                                                                                                                                                                                                                                                                                                                                                                                                                                                                                 | <i>i</i> PrOH         | 71                  | 100                   | 58        |
| 4                                                                                                                                                                                                                                                                                                                                                                                                                                                                                                                                                                                                                                                                                                                                                                                                                                                                                                                                                                                                                                                                                                                                 | <i>n</i> BuOH         | 49                  | 100                   | 43        |
| 5                                                                                                                                                                                                                                                                                                                                                                                                                                                                                                                                                                                                                                                                                                                                                                                                                                                                                                                                                                                                                                                                                                                                 | <i>t</i> Bu-OH        | 5                   | 56                    | 5         |
| 6                                                                                                                                                                                                                                                                                                                                                                                                                                                                                                                                                                                                                                                                                                                                                                                                                                                                                                                                                                                                                                                                                                                                 | EG                    | 65                  | 100                   | 50        |
| 7                                                                                                                                                                                                                                                                                                                                                                                                                                                                                                                                                                                                                                                                                                                                                                                                                                                                                                                                                                                                                                                                                                                                 | Propylene glycol      | 100                 | 100                   | 79        |
| <b>8</b>                                                                                                                                                                                                                                                                                                                                                                                                                                                                                                                                                                                                                                                                                                                                                                                                                                                                                                                                                                                                                                                                                                                          | <b>2,3-Butanediol</b> | <b>98</b>           | <b>100</b>            | <b>88</b> |
| 9                                                                                                                                                                                                                                                                                                                                                                                                                                                                                                                                                                                                                                                                                                                                                                                                                                                                                                                                                                                                                                                                                                                                 | 1,2-Pentanediol       | 100                 | 100                   | 80        |
| 10                                                                                                                                                                                                                                                                                                                                                                                                                                                                                                                                                                                                                                                                                                                                                                                                                                                                                                                                                                                                                                                                                                                                | 1,2-Hexanediol        | 100                 | 100                   | 72        |
| 11                                                                                                                                                                                                                                                                                                                                                                                                                                                                                                                                                                                                                                                                                                                                                                                                                                                                                                                                                                                                                                                                                                                                | Tol                   | -                   | 26                    | -         |
| 12                                                                                                                                                                                                                                                                                                                                                                                                                                                                                                                                                                                                                                                                                                                                                                                                                                                                                                                                                                                                                                                                                                                                | DMF                   | 3                   | 100                   | -         |
| 13                                                                                                                                                                                                                                                                                                                                                                                                                                                                                                                                                                                                                                                                                                                                                                                                                                                                                                                                                                                                                                                                                                                                | 1,4-Dioxane           | -                   | 34                    | -         |
| 14                                                                                                                                                                                                                                                                                                                                                                                                                                                                                                                                                                                                                                                                                                                                                                                                                                                                                                                                                                                                                                                                                                                                | CPME                  | -                   | 38                    | -         |
| 15                                                                                                                                                                                                                                                                                                                                                                                                                                                                                                                                                                                                                                                                                                                                                                                                                                                                                                                                                                                                                                                                                                                                | PhCF <sub>3</sub>     | -                   | 24                    | -         |
| 16                                                                                                                                                                                                                                                                                                                                                                                                                                                                                                                                                                                                                                                                                                                                                                                                                                                                                                                                                                                                                                                                                                                                | DMPU                  | 3                   | 100                   | -         |
| 17                                                                                                                                                                                                                                                                                                                                                                                                                                                                                                                                                                                                                                                                                                                                                                                                                                                                                                                                                                                                                                                                                                                                | 3-Hydroxy-2-butanone  | 55                  | 98                    | 46        |
| 18                                                                                                                                                                                                                                                                                                                                                                                                                                                                                                                                                                                                                                                                                                                                                                                                                                                                                                                                                                                                                                                                                                                                | 2,3-Butanedione       | 83                  | 80                    | -         |

**Table S6 Effect of Catalyst Loading**

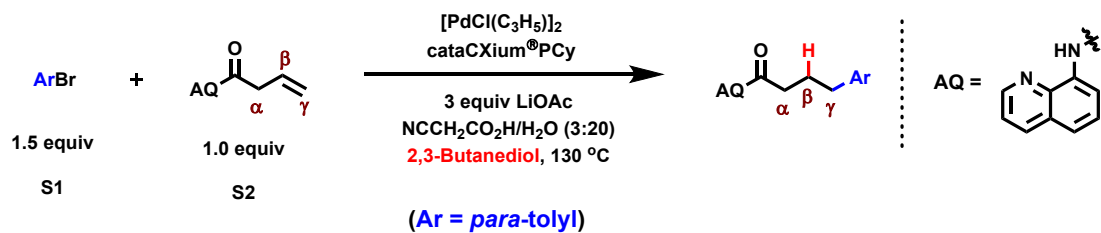

| Entry | Catalyst loading | ArBr/Conversion (%) | Alkene/Conversion (%) | Yield (%) |
|-------|------------------|---------------------|-----------------------|-----------|
| 1     | 2.5%             | 98                  | 99                    | 75        |
| 2     | 5.0%             | 98                  | 100                   | 88        |
| 3     | 7.5%             | 100                 | 100                   | 90        |
| 4     | 10%              | 100                 | 100                   | 92        |

**Table S7 Effect of Temperature**

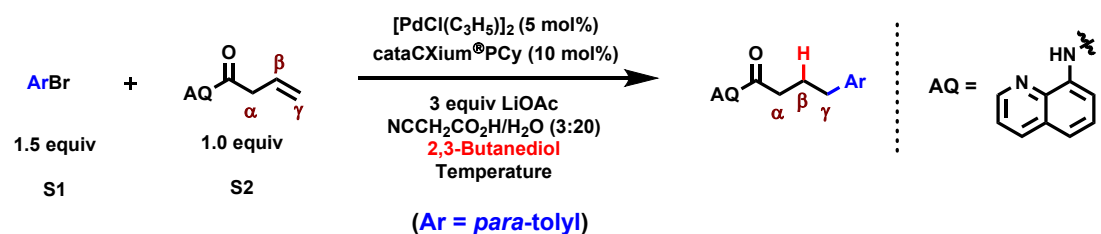

| Entry | Temperature/°C | ArBr/Conversion (%) | Alkene/Conversion (%) | Yield (%) |
|-------|----------------|---------------------|-----------------------|-----------|
| 1     | 80             | 88                  | 26                    | 5         |
| 2     | 100            | 95                  | 35                    | 31        |
| 3     | 110            | 96                  | 100                   | 80        |
| 4     | 120            | 96                  | 100                   | 85        |
| 5     | 130            | 98                  | 100                   | 88        |
| 6     | 140            | 99                  | 100                   | 90        |

**Table S8 Effect on Amount of H<sub>2</sub>O**

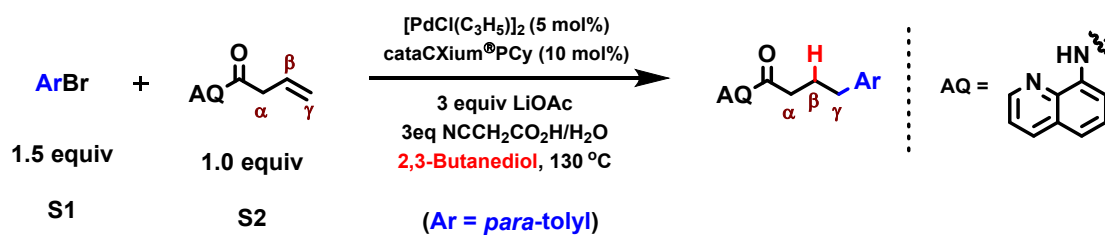

| Entry | H <sub>2</sub> O/eq | ArBr/Conversion (%) | Alkene/Conversion (%) | Yield (%) |
|-------|---------------------|---------------------|-----------------------|-----------|
| 1     | NO                  | 98                  | 100                   | 62        |
| 2     | 10                  | 100                 | 100                   | 71        |

|          |           |           |            |           |
|----------|-----------|-----------|------------|-----------|
| <b>3</b> | <b>20</b> | <b>98</b> | <b>100</b> | <b>88</b> |
| 4        | 50        | 99        | 100        | 60        |
| 6        | 100       | 99        | 100        | 51        |

### III. Synthesis of alkene substrates

Figure S1. 8-Aminoquinoline-containing alkene substrates

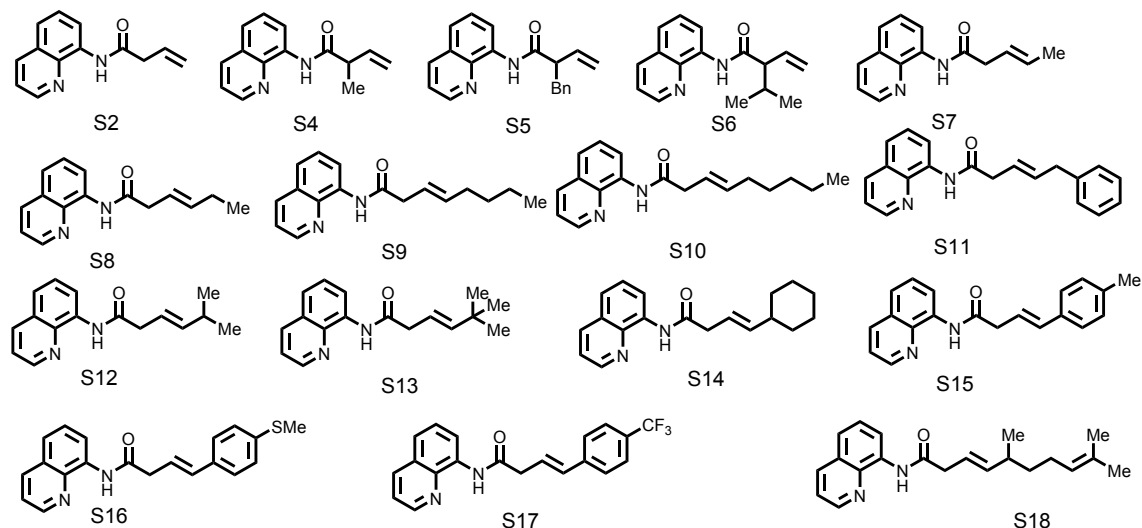

Note: alkene substrates **S2<sup>1a</sup>**, **S4-S12<sup>1a</sup>**, **S13<sup>1b</sup>** and **S14<sup>1a</sup>** were prepared according to the corresponding literature methods.

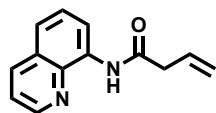

**N-(quinolin-8-yl)but-3-enamide (S2):** Crude acid (~7.2 mmol) was charged into a 100 mL flask containing 15 mL dry DCM. 8-Aminoquinoline (720 mg, 5 mmol), pyridine (0.8 mL, 10 mmol) and HATU (2.47 g, 6.5 mmol) were added sequentially, the reaction was stirred at ambient temperature for 20 h. The deep brown solution was diluted with 100 mL EtOAc, washed with sat. NaHCO<sub>3</sub> (40 mL × 2) and brine (40 mL × 1), and then purified by column chromatography (1:20 EA/PE) to afford **S2** as yellow oil (90%).

<sup>1</sup>H NMR (400 MHz, CDCl<sub>3</sub>): δ 9.97 (s, 1H), 8.85-8.72 (m, 2H), 8.15 (d, *J* = 8.3 Hz, 1H), 7.55-7.43 (m, 3H), 6.20-6.10 (m, 1H), 5.45-5.34 (m, 2H), 3.37 (d, *J* = 8Hz, 2H).

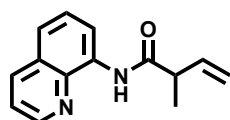

**2-methyl-N-(quinolin-8-yl)but-3-enamide (S4):**



$^1\text{H}$  NMR (400 MHz,  $\text{CDCl}_3$ ):  $\delta$  10.04 (s, 1H), 8.83-8.76 (m, 2H), 8.13 (dd,  $J = 8.3, 1.7$  Hz, 1H), 7.58-7.40 (m, 3H), 6.15-6.06 (m, 1H), 5.44-5.27 (m, 2H), 3.36 (m, 1H), 1.50-1.42 (d,  $J = 8.3$ , 3H).

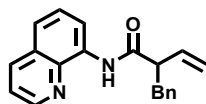

**2-benzyl-N-(quinolin-8-yl)but-3-enamide (S5):**

$^1\text{H}$  NMR (400 MHz,  $\text{CDCl}_3$ ):  $\delta$  9.92 (s, 1H), 8.81-8.74 (m, 2H), 8.13 (dd,  $J = 8.3, 1.7$  Hz, 1H), 7.56-7.46 (m, 2H), 7.44-7.41 (m, 1H), 7.27-7.22 (m, 4H), 7.20-7.13 (m, 1H), 6.09-6.0 (m, 1H), 5.33-5.21 (m, 2H), 3.52-3.46 (m, 1H), 3.41-3.36 (m, 1H), 3.0-2.95 (m, 1H).

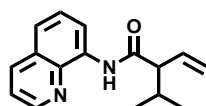

**2-isopropyl-N-(quinolin-8-yl)but-3-enamide (S6):**

$^1\text{H}$  NMR (400 MHz,  $\text{CDCl}_3$ ):  $\delta$  9.92 (s, 1H), 8.82-8.79 (m, 2H), 8.15 (dd,  $J = 8.3, 1.7$  Hz, 1H), 7.55-7.43 (m, 3H), 6.08-5.98 (m, 1H), 5.33-5.27 (m, 2H), 2.89-2.84 (m, 1H), 2.28 (m, 1H), 1.04 (d,  $J = 6.7$  Hz, 3H), 0.99 (d,  $J = 6.8$  Hz, 3H).

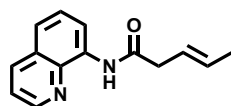

**(E)-N-(quinolin-8-yl)pent-3-enamide (S7):**

$^1\text{H}$  NMR (400 MHz,  $\text{CDCl}_3$ ):  $\delta$  10.14 (s, 1H), 8.84-8.75 (m, 2H), 8.16 (dd,  $J = 8.3, 1.7$  Hz, 1H), 7.59-7.43 (m, 3H), 5.90-5.71 (m, 2H), 3.27 (d,  $J = 5.9$  Hz, 2H), 1.83 (d,  $J = 6.8$  Hz, 3H).

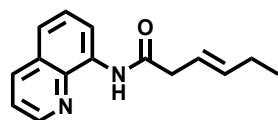

**(E)-N-(quinolin-8-yl)hex-3-enamide (S8):**

$^1\text{H}$  NMR (400 MHz,  $\text{CDCl}_3$ ):  $\delta$  10.10 (s, 1H), 8.79-8.76 (m, 2H), 8.16 (dd,  $J = 8.3, 1.7$  Hz, 1H), 7.58-7.41 (m, 3H), 5.91-5.70 (m, 2H), 3.27 (d,  $J = 7.0$  Hz, 2H), 2.23-2.15

(m, 2H), 1.13 (t,  $J = 7.5$  Hz, 3H).

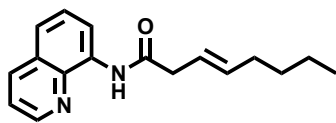

**(E)-N-(quinolin-8-yl)oct-3-enamide (S9):**

$^1\text{H}$  NMR (400 MHz,  $\text{CDCl}_3$ ):  $\delta$  10.08 (s, 1H), 8.80-8.75 (m, 2H), 8.15 (dd,  $J = 8.3, 1.7$  Hz, 1H), 7.57-7.41 (m, 3H), 5.89-5.69 (m, 2H), 3.30-3.25 (m, 2H), 2.2-2.14 (m, 2H), 1.54-1.36 (m, 4H), 0.93 (t,  $J = 7.2$  Hz, 3H).

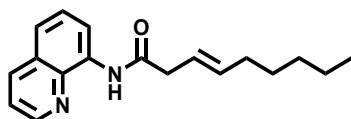

**(E)-N-(quinolin-8-yl)non-3-enamide (S10):**

$^1\text{H}$  NMR (400 MHz,  $\text{CDCl}_3$ ):  $\delta$  10.08 (s, 1H), 8.80-8.75 (m, 2H), 8.14 (dd,  $J = 8.3, 1.7$  Hz, 1H), 7.57-7.40 (m, 3H), 5.89-5.68 (m, 2H), 3.31-3.22 (m, 2H), 2.18-2.13 (m, 2H), 1.53-1.47 (m, 2H), 1.37-1.31 (m, 4H), 0.92-0.86 (m, 3H).

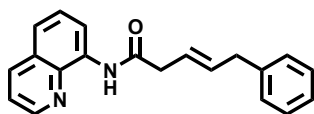

**(E)-5-phenyl-N-(quinolin-8-yl)pent-3-enamide (S11):**

$^1\text{H}$  NMR (400 MHz,  $\text{CDCl}_3$ ):  $\delta$  10.06 (s, 1H), 8.80-8.75 (m, 2H), 8.17 (dd,  $J = 8.3, 1.7$  Hz, 1H), 7.57-7.44 (m, 3H), 7.34-7.29 (m, 4H), 7.25-7.19 (m, 1H), 6.04-5.94 (m, 1H), 5.89-5.78 (m, 1H), 3.52 (d,  $J = 8.0, 1.1$  Hz, 2H), 3.33 (d,  $J = 8.0, 1.1$  Hz, 2H).

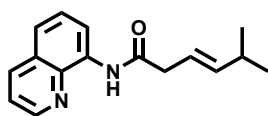

**(E)-5-methyl-N-(quinolin-8-yl)hex-3-enamide (S12):**

$^1\text{H}$  NMR (400 MHz,  $\text{CDCl}_3$ ):  $\delta$  10.15 (s, 1H), 8.81-8.73 (m, 2H), 8.17 (dd,  $J = 8.3, 1.7$  Hz, 1H), 7.58-7.40 (m, 3H), 5.87-5.65 (m, 2H), 3.30-3.23 (m, 2H), 2.49-2.51 (m,  $J = 6.7$  Hz, 1H), 1.13 (dd,  $J = 6.8, 1.9$  Hz, 6H).

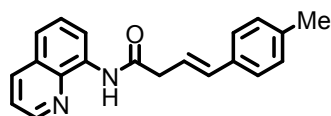

**(E)-N-(Quinolin-8-yl)-4-(p-tolyl)but-3-enamide (S15):** (E)-4-(p-tolyl)but-3-enoic acid was prepared according to the literature<sup>1c</sup>. The last synthesis step is following the method of synthesizing compound (S2).

<sup>1</sup>H NMR (400 MHz, CDCl<sub>3</sub>): δ 10.09 (s, 1H), 8.8-8.68 (m, 2H), 8.13 (dd, *J* = 8.3, 1.7 Hz, 1H), 7.60-7.47 (m, 2H), 7.46-7.32 (m, 3H), 7.15 (d, *J* = 7.8 Hz, 2H), 6.69 (d, *J* = 15.7 Hz, 1H), 6.48-6.4 (m, 1H), 3.49 (d, *J* = 8, 1.5 Hz, 2H), 2.35 (s, 3H).

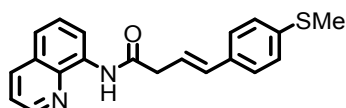

**(E)-4-(4-(Methylthio)phenyl)-N-(quinolin-8-yl)but-3-enamide (S16) :** The compound was prepared according to the literature<sup>1a</sup>. In an argon atmosphere, a dry 25-mL Schlenk tube containing a magnetic stirbar was charged with Pd<sub>2</sub>(dba)<sub>3</sub> (10 mol%, 27.6 mg, 0.03 mmol), Cy-Johnphos (20 mol%, 21 mg, 0.06 mmol), alkenes S2 (1 equiv, 0.3 mmol, 63.6 mg), Proton Sponge (3 equiv, 0.9 mmol, 192.6 mg), 4-(methylthio)phenyl trifluoromethanesulfonate (1.5 equiv, 0.45 mmol), dry DMPU (5.5 mL) and trifluoroacetic acid (3 equiv, 0.9 mmol, 73 uL) sequentially. The tube was capped tightly and the mixture was vigorously stirred in a *pre*-warmed 130°C oil bath. After alkenes was almost fully consumed (monitored by GCMS), the reaction mixture was concentrated on a rotary evaporator and then distilled under reduced pressure, the resulting residue was directly subjected to flash silica gel chromatography to afford **S16** as white solid (86%, 0.86 g).

<sup>1</sup>H NMR (400 MHz, CDCl<sub>3</sub>): δ 10.07 (s, 1H), 8.77 (dd, *J* = 7.2Hz, 1.6Hz, 1H), 8.73 (dd, *J* = 4.2Hz, 1.5Hz, 1H), 8.15 (dd, *J* = 8.2Hz, 1.5Hz, 1H), 7.56-7.449 (m, 2H), 7.43 (dd, *J* = 8.2Hz, 4.2Hz, 1H), 7.39-7.37 (m, 2H), 7.23-7.21 (m, 2H), 6.69-6.65 (m, 1H), 6.49-6.42 (m, 1H), 3.49 (dd, *J* = 7.3Hz, 0.8Hz, 2H), 2.50 (s, 3H).

<sup>13</sup>C NMR (100 MHz, CDCl<sub>3</sub>): δ 169.3, 148.2, 138.4, 137.8, 136.3, 134.3, 134.2, 133.8, 127.8, 127.3, 126.8, 126.5, 121.7, 121.6, 121.6, 116.4, 42.3, 15.7.

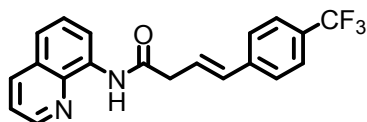

**(*E*)-*N*-(Quinolin-8-yl)-4-(4-(trifluoromethyl)phenyl)but-3-enamide (S17):**

(*E*)-4-(4-(trifluoromethyl)phenyl)but-3-enoic acid was prepared according to the literature<sup>lc</sup>. The last synthesis step is following the method of synthesizing compound (S2).

<sup>1</sup>H NMR (400 MHz, CDCl<sub>3</sub>): δ 10.05 (s, 1H), 8.81-8.71 (m, 2H), 8.16 (m, 1H), 7.63-7.48 (m, 6H), 7.48-7.41 (m, 1H), 6.78-6.69 (m, 1H), 6.64-6.57 (m, 1H), 3.54 (dd, *J* = 7.0, 1.3 Hz, 2H).

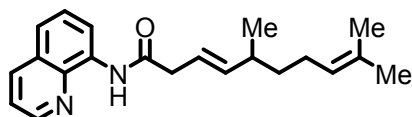

**(*E*)-5,9-Dimethyl-*N*-(quinolin-8-yl)deca-3,8-dienamide (S18):** (*E*)-5,9-dimethyldeca-3,8-dienoic acid was prepared according to the literature<sup>ld</sup>. The last synthesis step is following the method of synthesizing compound (S2).

<sup>1</sup>H NMR (400 MHz, CDCl<sub>3</sub>): δ 10.14 (s, 1H), 8.81-8.72 (m, 2H), 8.15 (dd, *J* = 8.3, 1.7 Hz, 1H), 7.57-7.47 (m, 2H), 7.45-7.42 (m, 4.2 Hz, 1H), 5.73-5.71 (m, 2H), 5.15-5.10 (m, 1H), 3.30-3.25 (m, 2H), 2.35-2.25 (m, 1H), 2.10-2.00 (m, 2H), 1.68 (t, *J* = 1.4 Hz, 3H), 1.56 (d, *J* = 1.4 Hz, 3H), 1.53-1.35 (m, 2H), 1.13 (d, *J* = 6.8 Hz, 3H).

**Figure S2. 8-Aminoquinoline-containing alkene substrates**

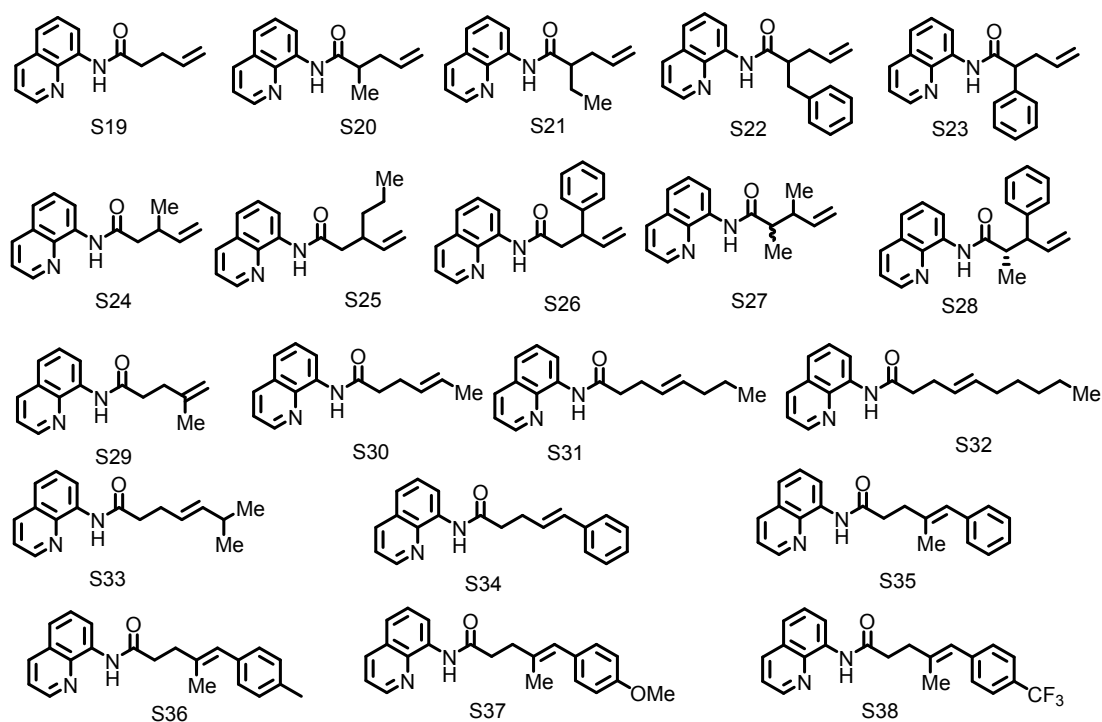

Note: alkene substrates S19-S28<sup>la</sup>, S30<sup>le</sup> and S33-S34<sup>le</sup> were prepared according to the corresponding literature methods. For alkene S29, S31, S32, S35, S36, S37 and S38, these corresponding acids are prepared according to the literature<sup>lf</sup>, The last synthesis step is following the method of synthesizing compound (S2).

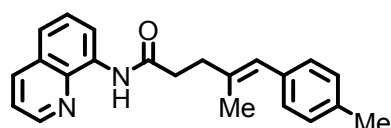

**(E)-4-Methyl-N-(quinolin-8-yl)-5-(p-tolyl)pent-4-enamide (S36):**

<sup>1</sup>H NMR (400 MHz, CDCl<sub>3</sub>): δ 9.88 (s, 1H), 8.80-8.77 (m, 2H), 8.16 (dd, *J* = 8.3Hz, 1.6Hz, 1H), 7.56-7.49 (m, 2H), 7.45 (dd, *J* = 8.3Hz, 4.2Hz, 1H), 7.15-7.09 (m, 4H), 6.38 (m, 1H), 2.82-2.78 (m, 2H), 2.71-2.67 (m, 2H), 2.33 (s, 3H), 1.95 (d, *J* = 1.0Hz, 3H).

<sup>13</sup>C NMR (100 MHz, CDCl<sub>3</sub>): δ 171.4, 148.3, 138.4, 136.6, 136.5, 135.8, 135.4, 134.6, 128.9, 128.1, 127.6, 125.8, 121.7, 121.6, 116.6, 37.1, 36.4, 21.3, 18.0.

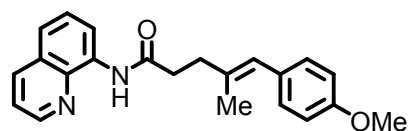

**(*E*)-5-(4-Methoxyphenyl)-4-methyl-*N*-(quinolin-8-yl)pent-4-enamide (S37):**

<sup>1</sup>H NMR (400 MHz, CDCl<sub>3</sub>): δ 9.88 (s, 1H), 8.81-8.77 (m, 2H), 8.16 (dd, *J* = 8.2Hz, 1.2Hz, 1H), 7.57-7.50 (m, 2H), 7.45 (dd, *J* = 8.3Hz, 4.2Hz, 1H), 7.17-7.15 (m, 2H), 6.85-6.83 (m, 2H), 6.36 (s, 1H), 3.80 (s, 3H), 2.81-2.78 (m, 2H), 2.70-2.67 (m, 2H), 1.94 (s, 3H).

<sup>13</sup>C NMR (100 MHz, CDCl<sub>3</sub>): δ 171.4, 157.9, 148.3, 138.4, 136.5, 135.8, 134.6, 130.9, 130.1, 128.0, 127.6, 125.4, 121.7, 121.6, 116.6, 113.5, 55.4, 37.1, 36.4, 18.0.

#### IV. Pd-catalyzed intermolecular reductive Heck reaction of various organohalides

*Typical procedure for reductive Heck reaction of various organobromides:* In an argon atmosphere, a dry 25-mL Schlenk tube containing a magnetic stirbar was charged with  $[\text{PdCl}(\text{C}_3\text{H}_5)]_2$  (5 mol%, 5.7 mg, 0.015 mmol), cataCXium®PCy (10 mol%, 10.2 mg, 0.03 mmol), alkenes **S2** (1 equiv, 0.3 mmol, 63.6 mg), LiOAc (3 equiv, 0.9 mmol, 20 mg), organobromides (1.5 equiv, 0.45 mmol), dry 2,3-butanediol (3 mL) and  $\text{H}_2\text{O}$  (20 equiv, 6 mmol, 108  $\mu\text{L}$ ). The tube was capped tightly and the mixture was vigorously stirred in a *pre-warmed* 130°C oil bath. After alkenes was almost fully consumed (monitored by GCMS), the reaction mixture was concentrated on a rotary evaporator and then distilled under vacuum, the resulting residue was directly subjected to flash silica gel chromatography. The structure of the desired product was confirmed by  $^1\text{H}$  and  $^{13}\text{C}$  NMR spectroscopy of the purified sample. The typical procedure using 0.3 mmol of alkenes was applied for all the isolation, unless stated otherwise.

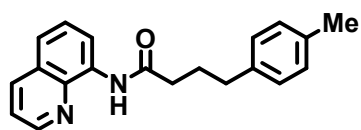

**N-(Quinolin-8-yl)-4-(*p*-tolyl)butanamide (P1).** The reaction mixture was stirred at 130°C for 18h. The product was purified by flash chromatography (1:20 EA/PE) as yellow oil (81 mg, 88%).

$^1\text{H}$  NMR (400 MHz,  $\text{CDCl}_3$ ):  $\delta$  9.79 (s, 1H), 8.80-8.79 (m, 2H), 8.15 (d,  $J = 8.1\text{Hz}$ , 1H), 7.56-7.44 (m, 3H), 7.12 (q,  $J = 7.2\text{Hz}$ , 4H), 2.74 (t,  $J = 7.5\text{Hz}$ , 2H), 2.58 (t,  $J = 7.4\text{Hz}$ , 2H), 2.33 (s, 3H), 2.19-2.11 (m, 2H).

$^{13}\text{C}$  NMR (100 MHz,  $\text{CDCl}_3$ ):  $\delta$  171.5, 148.1, 138.4, 138.3, 136.3, 135.4, 134.5, 129.1, 128.4, 127.9, 127.4, 121.5, 121.3, 116.4, 37.3, 34.7, 27.1, 21.0.

HRMS (ESI): Calcd for  $\text{C}_{20}\text{H}_{20}\text{N}_2\text{O}$   $[\text{M}+\text{H}]^+$ : 305.1654, Found: 305.1653.

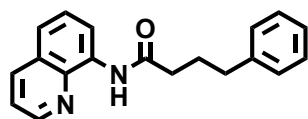

**4-Phenyl-N-(quinolin-8-yl)butanamide (P2).** The reaction mixture was stirred at

130°C for 18h. The product was purified by flash chromatography (1:20 EA/PE) as yellow solid (79 mg, 90%). Mp: 61.2-63.0 °C.

<sup>1</sup>H NMR (400 MHz, CDCl<sub>3</sub>) δ 9.79 (s, 1H), 8.80-8.78 (m, 2H), 8.15 (dd, *J* = 8.3Hz, 1.7Hz, 1H), 7.55-7.43 (m, 3H), 7.32-7.18 (m, 5H), 2.77 (t, *J* = 7.6Hz, 2H), 2.58 (t, *J* = 7.5Hz, 2H), 2.20-2.12 (m, 2H).

<sup>13</sup>C NMR (100 MHz, CDCl<sub>3</sub>) δ 171.5, 148.1, 141.5, 138.3, 136.4, 134.5, 128.6, 128.5, 128.0, 127.5, 126.0, 121.6, 121.4, 116.5, 37.3, 35.2, 27.1.

HRMS (ESI): Calcd for C<sub>19</sub>H<sub>18</sub>N<sub>2</sub>O [M+H]<sup>+</sup>: 291.1497, Found: 291.1499.

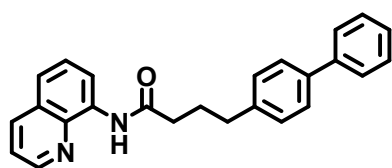

**4-([1,1'-Biphenyl]-4-yl)-N-(quinolin-8-yl)butanamide (P3).** The reaction mixture was stirred at 130°C for 18h. The product was purified by flash chromatography (1:20 EA/PE) as white solid (93 mg, 85%). Mp: 60.2-61.0 °C.

<sup>1</sup>H NMR (400 MHz, CDCl<sub>3</sub>) δ 9.87 (s, 1H), 8.88-8.81 (m, 2H), 8.15 (dd, *J* = 8.3Hz, 1.7Hz, 1H), 7.67-7.55 (m, 5H), 7.51-7.40 (m, 4H), 7.36 (t, *J* = 8.2Hz, 3H), 2.84 (t, *J* = 7.6Hz, 2H), 2.64 (t, *J* = 7.4Hz, 2H), 2.28-2.20 (m, 2H).

<sup>13</sup>C NMR (100 MHz, CDCl<sub>3</sub>) δ 171.5, 148.1, 141.1, 140.7, 139.0, 138.3, 136.5, 134.5, 129.1, 128.8, 128.0, 127.5, 127.2, 127.1, 127.0, 121.7, 121.5, 116.6, 37.4, 34.9, 27.1.

HRMS (ESI): Calcd for C<sub>25</sub>H<sub>22</sub>N<sub>2</sub>O [M+H]<sup>+</sup>: 367.1810, Found: 367.1810.

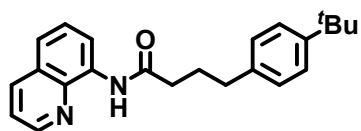

**4-(4-(*tert*-Butyl)phenyl)-N-(quinolin-8-yl)butanamide (P4).** The reaction mixture was stirred at 130°C for 18h. The product was purified by flash chromatography (1:20 EA/PE) as yellow oil (96 mg, 92%).



$^1\text{H}$  NMR (400 MHz,  $\text{CDCl}_3$ ):  $\delta$  9.79 (s, 1H), 8.81-8.78 (m, 2H), 8.16 (dd,  $J = 8.3\text{Hz}$ , 1.5Hz, 1H), 7.56-7.44 (m, 3H), 7.32 (d,  $J = 8.2\text{Hz}$ , 2H), 7.18 (d,  $J = 8.2\text{Hz}$ , 2H), 2.75 (t,  $J = 7.5\text{Hz}$ , 2H), 2.59 (t,  $J = 7.5\text{Hz}$ , 2H), 2.20-2.12(m, 2H), 1.31 (s, 9H).

$^{13}\text{C}$  NMR (100 MHz,  $\text{CDCl}_3$ )  $\delta$  171.7, 148.9, 148.2, 138.5, 138.5, 136.5, 134.7, 128.4, 128.1, 127.6, 125.4, 121.7, 121.5, 116.6, 37.6, 34.8, 34.5, 31.6, 27.1.

HRMS (ESI): Calcd for  $\text{C}_{23}\text{H}_{26}\text{N}_2\text{O}$   $[\text{M}+\text{H}]^+$ : 347.2123 , found: 347.2121.

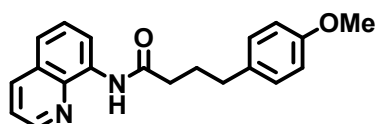

**4-(4-Methoxyphenyl)-N-(quinolin-8-yl)butanamide (P5).** The reaction mixture was stirred at  $130^\circ\text{C}$  for 18h. The product was purified by flash chromatography (1:20 EA/PE) as yellow oil (85 mg, 88%).

$^1\text{H}$  NMR (400 MHz,  $\text{CDCl}_3$ ):  $\delta$  9.79 (s, 1H), 8.81-8.79 (m, 2H), 8.15 (dd,  $J = 8.3\text{Hz}$ , 1.6Hz, 1H), 7.56-7.43 (m, 3H), 7.16 (d,  $J = 8.6\text{Hz}$ , 2H), 6.85 (d,  $J = 8.8\text{Hz}$ , 2H), 3.79 (s, 3H), 2.72 (t,  $J = 7.5\text{Hz}$ , 2H), 2.57 (t,  $J = 7.5\text{Hz}$ , 2H), 2.17-2.09 (m, 2H).

$^{13}\text{C}$  NMR (100 MHz,  $\text{CDCl}_3$ )  $\delta$  171.6, 158.0, 148.2, 138.4, 136.5, 134.6, 133.7, 129.6, 128.0, 127.5, 121.7, 121.5, 116.5, 113.9, 55.4, 37.4, 34.4, 27.4.

HRMS (ESI): Calcd for  $\text{C}_{20}\text{H}_{20}\text{N}_2\text{O}_2$   $[\text{M}+\text{H}]^+$ : 321.1603 , Found: 321.1601

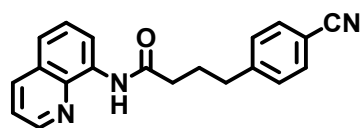

**4-(4-Cyanophenyl)-N-(quinolin-8-yl)butanamide (P6)** . The reaction mixture was stirred at  $130^\circ\text{C}$  for 18h. The product was purified by flash chromatography (1:10 EA/PE) as brown solid (79 mg, 83%). Mp:  $96.0\text{-}97.3^\circ\text{C}$ .

$^1\text{H}$  NMR (400 MHz,  $\text{CDCl}_3$ ):  $\delta$  9.78 (s, 1H), 8.80-8.75 (m, 2H), 8.16 (dd,  $J = 8.2\text{Hz}$ , 1.6Hz, 1H), 7.57-7.44 (m, 5H), 7.33 (d,  $J = 8.2\text{Hz}$ , 2H), 2.82 (t,  $J = 7.7\text{Hz}$ , 2H), 2.58 (t,  $J = 7.3\text{Hz}$ , 2H), 2.19-2.11 (m, 2H).

$^{13}\text{C}$  NMR (100 MHz,  $\text{CDCl}_3$ )  $\delta$  170.9, 148.2, 147.3, 138.3, 136.5, 134.3, 132.3, 129.4, 128.0, 127.4, 121.7, 121.6, 119.1, 116.5, 109.9, 37.0, 35.3, 26.5.

HRMS (ESI): Calcd for C<sub>20</sub>H<sub>17</sub>N<sub>3</sub>O [M+H]<sup>+</sup>: 316.1450, Found: 316.1448.

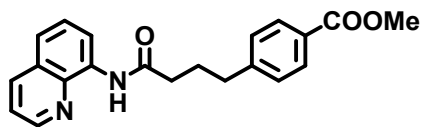

**Methyl 4-(4-oxo-4-(quinolin-8-ylamino)butyl)benzoate (P7).** The reaction mixture was stirred at 130°C for 18h. The product was purified by flash chromatography (1:20 EA/PE) as yellow oil (32 mg, 30%). While NCCH<sub>2</sub>COOH (3 equiv, 0.9 mmol, 77mg) was added, the product was afforded in 68% yield (72 mg).

<sup>1</sup>H NMR (400 MHz, CDCl<sub>3</sub>) δ 9.79 (s, 1H), 8.80-8.77 (m, 2H), 8.15 (dd, *J* = 8.2Hz, 1.7Hz, 1H), 7.98-7.95 (m, 2H), 7.50-7.43 (m, 3H), 7.31 (d, *J* = 8.1Hz, 2H), 3.90 (s, 3H), 2.82 (t, *J* = 7.6Hz, 2H), 2.58 (t, *J* = 7.3Hz, 2H), 2.21-2.13 (m, 2H).

<sup>13</sup>C NMR (100 MHz, CDCl<sub>3</sub>) δ 171.2, 167.2, 148.2, 147.1, 138.4, 136.5, 134.5, 129.9, 128.7, 128.1, 128.0, 127.5, 121.7, 121.6, 116.5, 52.1, 37.2, 35.3, 26.7.

HRMS (ESI): Calcd for C<sub>21</sub>H<sub>20</sub>N<sub>2</sub>O<sub>3</sub> [M+H]<sup>+</sup>: 349.1552, Found: 349.1547.

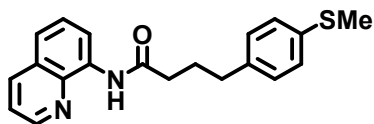

**4-(4-(Methylthio)phenyl)-N-(quinolin-8-yl)butanamide (P8).** The reaction mixture was stirred at 130°C for 18h. The product was purified by flash chromatography (1:20 EA/PE) as yellow oil (81 mg, 80%).

<sup>1</sup>H NMR (400 MHz, CDCl<sub>3</sub>) δ 9.79 (s, 1H), 8.80-8.79 (m, 2H), 8.15 (dd, *J* = 8.3Hz, 1.7Hz, 1H), 7.54-7.43 (m, 3H), 7.19 (q, *J* = 8.4Hz, 4H), 2.73 (t, *J* = 7.5Hz, 2H), 2.57 (t, *J* = 7.4Hz, 2H), 2.47 (s, 3H), 2.17-2.10 (m, 2H).

<sup>13</sup>C NMR (100 MHz, CDCl<sub>3</sub>) δ 171.5, 148.2, 138.7, 138.4, 136.5, 135.6, 134.6, 129.2, 128.0, 127.5, 127.2, 121.7, 121.5, 116.5, 37.3, 34.7, 27.1, 16.4.

HRMS (ESI): Calcd for C<sub>20</sub>H<sub>20</sub>N<sub>2</sub>OS [M+H]<sup>+</sup>: 337.1375, Found: 337.1373.

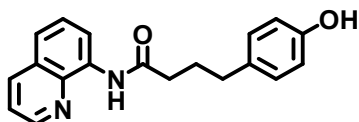

**4-(4-Hydroxyphenyl)-*N*-(quinolin-8-yl)butanamide (P9).** The title compound was prepared from PhBr (3 equiv). The reaction mixture was stirred at 130°C for 18h. The product was purified by flash chromatography (1:20 EA/PE) as white solid (45 mg, 48%). While NCCH<sub>2</sub>COOH (3 equiv, 0.9 mmol, 77mg) was added, the product was afforded in 77% yield (71 mg). Mp: 113.3-115.0 °C.

<sup>1</sup>H NMR (400 MHz, CDCl<sub>3</sub>) δ 9.80 (s, 1H), 8.80-8.76 (m, 2H), 8.15 (dd, *J* = 8.3Hz, 1.7Hz, 1H), 7.55-7.43 (m, 3H), 7.06 (d, *J* = 8.4Hz, 2H), 6.77(d, *J* = 8.5Hz, 2H), 5.71(s, 1H), 2.67 (t, *J* = 7.4Hz, 2H), 2.56 (t, *J* = 7.3Hz, 2H), 2.14-2.06 (m, 2H).

<sup>13</sup>C NMR (100 MHz, CDCl<sub>3</sub>) δ 172.2, 154.4, 148.3, 138.4, 136.6, 134.4, 133.2, 129.7, 128.1, 127.6, 121.8, 121.7, 116.9, 115.4, 37.4, 34.4, 27.4.

HRMS (ESI): Calcd for C<sub>19</sub>H<sub>18</sub>N<sub>2</sub>O<sub>2</sub> [M+H]<sup>+</sup>: 307.1447, Found: 307.1446.

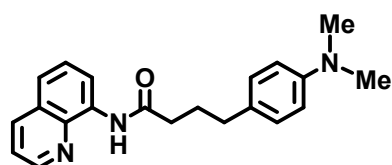

**4-(4-(Dimethylamino)phenyl)-*N*-(quinolin-8-yl)butanamide (P10).** The reaction mixture was stirred at 130°C for 18h. The product was purified by flash chromatography (1:20 EA/PE) as yellow oil (55 mg, 55%).

<sup>1</sup>H NMR (400 MHz, CDCl<sub>3</sub>) δ 9.79 (s, 1H), 8.81-8.79 (m, 2H), 8.16 (dd, *J* = 8.3Hz, 1.7Hz, 1H), 7.56-7.44 (m, 3H), 7.14-7.12 (m, 2H), 6.72-6.70 (m, 2H), 2.91 (s, 6H), 2.69 (t, *J* = 7.5Hz, 2H), 2.57 (t, *J* = 7.5Hz, 2H), 2.16-2.09 (m, 2H).

<sup>13</sup>C NMR (100 MHz, CDCl<sub>3</sub>) δ 171.9, 149.3, 148.2, 138.5, 136.5, 134.7, 129.8, 129.3, 128.1, 127.6, 121.7, 121.4, 116.5, 113.2, 41.0, 37.6, 34.3, 27.5.

HRMS (ESI): Calcd for C<sub>21</sub>H<sub>23</sub>N<sub>3</sub>O [M+H]<sup>+</sup>: 334.1919, Found: 334.1915.

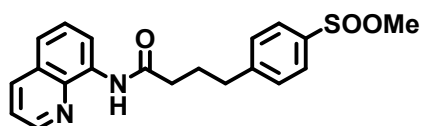

**4-(4-(Methylsulfonyl)phenyl)-*N*-(quinolin-8-yl)butanamide (P11).** The reaction mixture was stirred at 130°C for 18h. The product was purified by flash

chromatography (1:20 EA/PE) as yellow solid (37 mg, 33%). While NCCH<sub>2</sub>COOH (3 equiv, 0.9 mmol, 77mg) was added, the product was afforded in 75% yield (83 mg). Mp: 106.9-108.5 °C.

<sup>1</sup>H NMR (400 MHz, CDCl<sub>3</sub>) δ 9.78 (s, 1H), 8.78-8.73 (m, 2H), 8.14 (dd, *J* = 8.2Hz, 1.7Hz, 1H), 7.83 (d, *J* = 8.2Hz, 2H), 7.53-7.40 (m, 5H), 3.01 (s, 3H), 2.83 (t, *J* = 7.7Hz, 2H), 2.57 (t, *J* = 7.3Hz, 2H), 2.18-2.11 (m, 2H).

<sup>13</sup>C NMR (100 MHz, CDCl<sub>3</sub>) δ 170.9, 148.2, 138.2, 136.5, 134.3, 129.6, 128.0, 127.6, 127.4, 121.7, 121.6, 116.5, 44.6, 37.0, 35.1, 26.6.

HRMS (ESI): Calcd for C<sub>20</sub>H<sub>20</sub>N<sub>2</sub>O<sub>3</sub>S [M+H]<sup>+</sup>: 369.1273, Found: 369.1279.

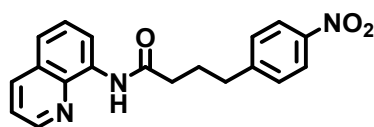

**(4-Nitrophenyl)-N-(quinolin-8-yl)butanamide (P12).** The title compound was prepared from PhBr (3 equiv). The reaction mixture was stirred at 130°C for 18h. The product was purified by flash chromatography (1:20 EA/PE) as yellow solid (41 mg, 41%). While NCCH<sub>2</sub>COOH (3 equiv, 0.9 mmol, 77mg) was added, the product was afforded in 63% yield (64 mg). Mp: 89.4-91.0 °C.

<sup>1</sup>H NMR (401 MHz, CDCl<sub>3</sub>) δ 9.77 (s, 1H), 8.79-8.73 (m, 2H), 8.15-8.09 (m, 3H), 7.53-7.42 (m, 3H), 7.36 (d, *J* = 8Hz, 2H), 2.85 (t, *J* = 8Hz, 2H), 2.58 (t, *J* = 8Hz, 2H), 2.20-2.12 (m, 2H).

<sup>13</sup>C NMR (100 MHz, CDCl<sub>3</sub>) δ 170.8, 148.3, 148.3, 146.6, 138.4, 136.5, 134.4, 129.4, 128.0, 127.5, 123.8, 121.8, 121.7, 116.6, 37.0, 35.1, 26.6.

HRMS (ESI): Calcd for C<sub>19</sub>H<sub>17</sub>N<sub>3</sub>O<sub>3</sub> [M+H]<sup>+</sup>: 336.1348, Found: 336.1348.

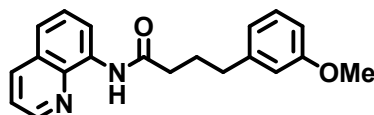

**4-(3-Methoxyphenyl)-N-(quinolin-8-yl)butanamide (P13).** The reaction mixture was stirred at 130°C for 18h. The product was purified by flash chromatography (1:20 EA/PE) as yellow oil (78 mg, 82%).

$^1\text{H}$  NMR (400 MHz,  $\text{CDCl}_3$ )  $\delta$  9.79 (s, 1H), 8.80-8.78 (m, 2H), 8.14 (dd,  $J = 8.3\text{Hz}$ , 1.7Hz, 1H), 7.55-7.42 (m, 3H), 7.22 (dd,  $J = 15.6\text{Hz}$ , 7.8Hz, 1H), 6.85-6.74 (m, 3H), 3.78 (s, 3H), 2.75 (t,  $J = 7.5\text{Hz}$ , 2H), 2.57 (t,  $J = 7.5\text{Hz}$ , 2H), 2.20-2.12 (m, 2H).

$^{13}\text{C}$  NMR (100 MHz,  $\text{CDCl}_3$ )  $\delta$  171.5, 159.8, 148.2, 143.2, 138.4, 136.5, 134.6, 129.5, 128.0, 127.5, 121.7, 121.5, 121.1, 116.5, 114.3, 111.5, 55.2, 37.4, 35.3, 27.0.

HRMS (ESI): Calcd for  $\text{C}_{20}\text{H}_{20}\text{N}_2\text{O}_2$   $[\text{M}+\text{H}]^+$ : 321.1603, Found: 321.1597.

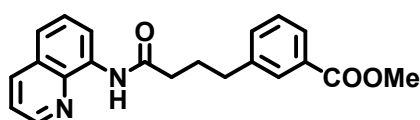

**Methyl 3-(4-oxo-4-(quinolin-8-ylamino)butyl)benzoate (P14).** The reaction mixture was stirred at  $130^\circ\text{C}$  for 18h. The product was purified by flash chromatography (1:30 EA/PE) as yellow oil (34 mg, 32%). While  $\text{NCCH}_2\text{COOH}$  (3 equiv, 0.9 mmol, 77mg) was added, the product was afforded in 72% yield (75 mg).

$^1\text{H}$  NMR (401 MHz,  $\text{CDCl}_3$ )  $\delta$  9.79 (s, 1H), 8.79 (d,  $J = 5.2\text{Hz}$ , 2H), 8.13 (d,  $J = 8.4\text{Hz}$ , 1H), 7.92 (s, 1H), 7.88 (d,  $J = 7.8\text{Hz}$ , 2H), 7.54-7.33 (m, 4H), 7.27 (s, 1H), 3.88 (s, 3H), 2.81 (d,  $J = 7.6\text{Hz}$ , 2H), 2.57 (d,  $J = 7.5\text{Hz}$ , 2H), 2.21-2.13 (m, 2H).

$^{13}\text{C}$  NMR (100 MHz,  $\text{CDCl}_3$ )  $\delta$  171.3, 167.3, 148.2, 141.9, 138.3, 136.5, 134.5, 133.3, 130.4, 129.7, 128.6, 128.0, 127.5, 127.5, 121.7, 121.6, 116.6, 52.2, 37.3, 35.1, 27.0.

HRMS (ESI): Calcd for  $[\text{M}+\text{H}]^+$ :  $\text{C}_{21}\text{H}_{20}\text{N}_2\text{O}_3$   $[\text{M}+\text{H}]^+$ : 349.1552, Found: 349.1555.

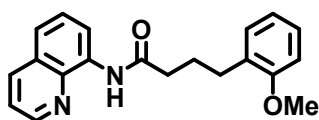

**4-(2-Methoxyphenyl)-N-(quinolin-8-yl)butanamide (P15).** The reaction mixture was stirred at  $130^\circ\text{C}$  for 18h. The product was purified by flash chromatography (1:30 EA/PE) as yellow oil (86 mg, 90%).

$^1\text{H}$  NMR (400 MHz,  $\text{CDCl}_3$ ):  $\delta$  9.84 (s, 1H), 8.82-8.80 (m, 2H), 8.16 (dd,  $J = 8.3\text{Hz}$ , 1.6Hz, 1H), 7.56-7.43 (m, 3H), 7.21-7.18 (m, 2H), 6.92-6.84 (m, 2H), 3.80 (s, 3H), 2.78 (t,  $J = 7.7\text{Hz}$ , 2H), 2.58 (t,  $J = 7.6\text{Hz}$ , 2H), 2.18-2.10 (m, 2H).

$^{13}\text{C}$  NMR (100 MHz,  $\text{CDCl}_3$ )  $\delta$  171.9, 157.7, 148.2, 138.5, 136.5, 134.7, 130.3, 130.0, 128.1, 127.6, 127.4, 121.7, 121.4, 120.5, 116.5, 110.3, 55.3, 37.8, 29.8, 25.7.

HRMS (ESI): Calcd for  $C_{20}H_{20}N_2O_2$   $[M+H]^+$ : 321.1603, Found: 321.1599.

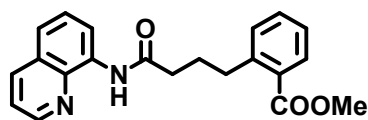

**Methyl 2-(4-oxo-4-(quinolin-8-ylamino)butyl)benzoate (P16).** The reaction mixture was stirred at 130°C for 18h. The product was purified by flash chromatography (1:30 EA/PE) as yellow oil (71 mg, 68%). While  $NCCH_2COOH$  (3 equiv, 0.9 mmol, 77mg) was added, the product was afforded in 81% yield (85 mg).

$^1H$  NMR (400 MHz,  $CDCl_3$ )  $\delta$  9.62 (s, 1H), 8.60-8.58 (m, 2H), 7.95 (dd,  $J$  = 8.3Hz, 1.7Hz, 1H), 7.70 (dd,  $J$  = 7.8, 1.4Hz, 1H), 7.36-7.22 (m, 4H), 7.13 (dd,  $J$  = 7.7Hz, 1.3Hz, 1H), 7.08-7.04 (m, 1H), 3.69 (s, 3H), 2.92 (t,  $J$  = 7.5Hz, 2H), 2.44 (t,  $J$  = 7.5Hz, 2H), 1.99-1.91 (m, 2H).

$^{13}C$  NMR (100 MHz,  $CDCl_3$ )  $\delta$  171.6, 168.1, 148.2, 143.7, 138.4, 136.5, 134.7, 132.2, 131.3, 130.9, 129.5, 128.0, 127.5, 126.2, 121.7, 121.5, 116.5, 52.1, 37.9, 33.9, 27.4.

HRMS (ESI): Calcd for  $C_{21}H_{20}N_2O_3$   $[M+H]^+$ : 349.1552, Found: 349.1549.

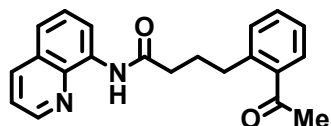

**4-(2-Acetylphenyl)-N-(quinolin-8-yl)butanamide (P17).** The reaction mixture was stirred at 130°C for 18 h. The product was purified by flash chromatography (1:20 EA/PE) as yellow oil (72 mg, 72%). While  $NCCH_2COOH$  (3 equiv, 0.9 mmol, 77mg) was added, the product was afforded in 85% yield (85 mg).

$^1H$  NMR (400 MHz,  $CDCl_3$ )  $\delta$  9.81 (s, 1H), 8.81-8.77(m, 2H), 8.15 (dd,  $J$  = 8.3Hz, 1.7Hz, 1H), 7.68 (dd,  $J$  = 7.7Hz, 1.3Hz, 1H), 7.55-7.26 (m, 6H), 3.03-2.99 (m, 2H), 2.66-2.60 (m, 5H), 2.16-2.08 (m, 2H).

$^{13}C$  NMR (100 MHz,  $CDCl_3$ )  $\delta$  202.1, 171.7, 148.2, 142.0, 138.4, 137.8, 136.5, 134.7, 131.7, 131.6, 129.5, 128.0, 127.5, 126.1, 121.7, 121.45, 116.5, 37.9, 33.5, 30.0, 27.5.

HRMS (ESI): Calcd for  $C_{21}H_{20}N_2O_2$   $[M+H]^+$ : 333.1603 , Found: 333.1659.

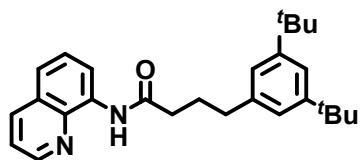

**4-(3,5-di-tert-Butylphenyl)-N-(quinolin-8-yl)butanamide (P18).** The reaction mixture was stirred at 130°C for 18h. The product was purified by flash chromatography (1:20 EA/PE) as yellow oil (99 mg, 82%).

<sup>1</sup>H NMR (400 MHz, CDCl<sub>3</sub>) δ 9.86 (s, 1H), 8.85 (dd, *J* = 7.5Hz, 1.5Hz, 2H), 8.16 (dd, *J* = 8.3Hz, 1.7Hz, 1H), 7.58-7.44 (m, 3H), 7.32 (s, 1H), 7.13 (d, *J* = 1.8Hz, 2H), 2.80 (t, *J* = 7.7Hz, 2H), 2.65 (t, *J* = 7.5Hz, 2H), 2.21 (p, *J* = 7.6Hz, 2H), 1.36 (s, 18H).

<sup>13</sup>C NMR (100 MHz, CDCl<sub>3</sub>) δ 171.7, 150.8, 148.2, 140.7, 138.4, 136.4, 134.6, 128.0, 127.5, 122.8, 121.6, 121.5, 120.0, 116.5, 37.7, 35.9, 34.8, 31.6, 27.5.

HRMS (ESI): Calcd for C<sub>27</sub>H<sub>34</sub>N<sub>2</sub>O [M+H]<sup>+</sup>: 403.2749, Found: 403.2741.

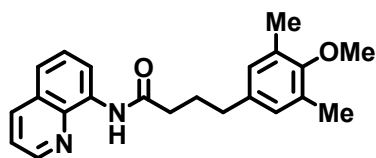

**4-(4-Methoxy-3,5-dimethylphenyl)-N-(quinolin-8-yl)butanamide (P19).** The reaction mixture was stirred at 130°C for 18h. The product was purified by flash chromatography (1:20 EA/PE) as yellow solid (93 mg, 89%). Mp: 119.6-121.0 °C.

<sup>1</sup>H NMR (400 MHz, CDCl<sub>3</sub>) δ 9.79 (s, 1H), 8.81-8.79 (m, 2H), 8.16 (dd, *J* = 8.3Hz, 1.7Hz, 1H), 7.56-7.44 (m, 3H), 6.88 (s, 2H), 3.69 (s, 3H), 2.65 (t, *J* = 7.5Hz, 2H), 2.57 (t, *J* = 7.4Hz, 2H), 2.26 (s, 6H), 2.19-2.07 (m, 2H).

<sup>13</sup>C NMR (100 MHz, CDCl<sub>3</sub>) δ 171.7, 155.3, 148.2, 138.5, 136.8, 136.5, 134.7, 130.7, 129.0, 128.1, 127.6, 121.7, 121.5, 116.6, 59.8, 37.5, 34.6, 27.3, 16.2.

HRMS (ESI): Calcd for C<sub>22</sub>H<sub>24</sub>N<sub>2</sub>O<sub>2</sub> [M+H]<sup>+</sup>: 349.1916, Found: 349.1913.

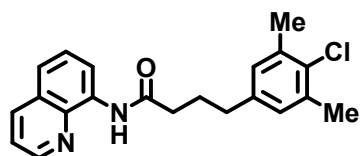

**4-(4-Chloro-3,5-dimethylphenyl)-N-(quinolin-8-yl)butanamide (P20).** The reaction mixture was stirred at 130°C for 18h. The product was purified by flash

chromatography (1:20 EA/PE) as yellow oil (87 mg, 82%).

$^1\text{H}$  NMR (400 MHz,  $\text{CDCl}_3$ )  $\delta$  9.78 (s, 1H), 8.80-8.78 (m, 2H), 8.16 (dd,  $J = 8.3\text{Hz}$ , 1.7Hz, 1H), 7.56-7.44 (m, 3H), 6.95 (s, 2H), 2.67 (t,  $J = 7.5\text{Hz}$ , 2H), 2.56 (t,  $J = 7.4\text{Hz}$ , 2H), 2.34 (s, 6H), 2.16-2.09 (m, 2H).

$^{13}\text{C}$  NMR (100 MHz,  $\text{CDCl}_3$ )  $\delta$  171.5, 148.2, 139.3, 138.4, 136.5, 136.2, 134.6, 132.3, 128.8, 128.1, 127.6, 121.7, 121.6, 116.5, 37.3, 34.5, 27.1, 20.8.

HRMS (ESI): Calcd for  $\text{C}_{21}\text{H}_{21}\text{ClN}_2\text{O}$   $[\text{M}+\text{H}]^+$ : 353.1421, Found: 353.1416.

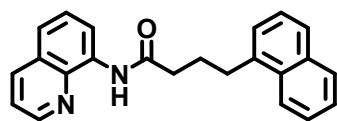

**4-(Naphthalen-1-yl)-N-(quinolin-8-yl)butanamide (P21).** The reaction mixture was stirred at  $130^\circ\text{C}$  for 18h. The product was purified by flash chromatography (1:20 EA/PE) as yellow oil (92 mg, 90%).

$^1\text{H}$  NMR (400 MHz,  $\text{CDCl}_3$ )  $\delta$  9.83 (s, 1H), 8.85-8.79 (m, 2H), 8.16-8.13 (m, 2H), 7.87 (dd,  $J = 7.6\text{Hz}$ , 1.8Hz, 1H), 7.74 (dd,  $J = 7.2\text{Hz}$ , 2.3Hz, 1H), 7.58-7.39 (m, 7H), 3.25 (t,  $J = 7.7\text{Hz}$ , 2H), 2.67 (t,  $J = 7.3\text{Hz}$ , 2H), 2.35-2.28 (m, 2H).

$^{13}\text{C}$  NMR (100 MHz,  $\text{CDCl}_3$ )  $\delta$  171.4, 148.1, 138.4, 137.7, 136.4, 134.5, 134.0, 131.9, 128.8, 128.0, 127.5, 126.9, 126.3, 125.9, 125.6, 125.5, 123.9, 121.6, 121.5, 116.5, 37.6, 32.4, 26.4.

HRMS (ESI): Calcd for  $\text{C}_{23}\text{H}_{20}\text{N}_2\text{O}$   $[\text{M}+\text{H}]^+$ : 341.1654, Found: 341.1651.

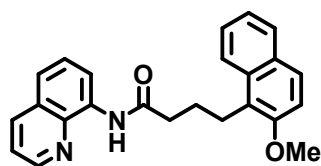

**4-(2-Methoxynaphthalen-1-yl)-N-(quinolin-8-yl)butanamide (P22).** The reaction mixture was stirred at  $130^\circ\text{C}$  for 18h. The product was purified by flash chromatography (1:20 EA/PE) as yellow solid (69 mg, 62%). Mp:  $61.2\text{--}63.0^\circ\text{C}$ .

$^1\text{H}$  NMR (400 MHz,  $\text{CDCl}_3$ )  $\delta$  9.80 (s, 1H), 8.83-8.77 (m, 2H), 8.14 (dd,  $J = 8.3\text{Hz}$ , 1.7Hz, 1H), 8.04 (d,  $J = 8.6\text{Hz}$ , 1H), 7.79-7.72 (m, 2H), 7.56-7.41 (m, 4H), 7.34-7.25 (m, 2H), 3.90 (s, 3H), 3.32-3.12 (m, 2H), 2.65 (t,  $J = 7.4\text{Hz}$ , 2H), 2.22-2.15 (m, 2H).



$^{13}\text{C}$  NMR (100 MHz,  $\text{CDCl}_3$ )  $\delta$  171.9, 154.5, 148.1, 138.4, 136.4, 134.7, 133.1, 129.2, 128.5, 128.0, 127.8, 127.5, 126.4, 123.3, 123.2, 122.8, 121.6, 121.3, 116.5, 113.2, 56.4, 37.7, 25.6, 24.2.

HRMS (ESI): Calcd for  $\text{C}_{24}\text{H}_{22}\text{N}_2\text{O}_2$   $[\text{M}+\text{H}]^+$ : 371.1760, Found: 371.1756.

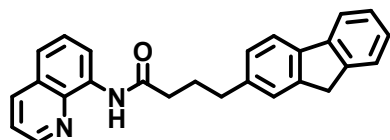

**4-(9H-Fluoren-2-yl)-N-(quinolin-8-yl)butanamide (P23).** The reaction mixture was stirred at 130°C for 18h. The product was purified by flash chromatography (1:20 EA/PE) as yellow solid (100 mg, 88%). Mp: 144.0-145.0 °C.

$^1\text{H}$  NMR (400 MHz,  $\text{CDCl}_3$ )  $\delta$  9.78 (s, 1H), 8.80-8.76 (m, 2H), 8.13 (dd,  $J = 8.3\text{Hz}$ , 1.7Hz, 1H), 7.74-7.68 (m, 2H), 7.54-7.41 (m, 5H), 7.36-7.33 (m, 1H), 7.28-7.23 (m, 2H), 3.84 (s, 2H), 2.84 (t,  $J = 7.5\text{Hz}$ , 2H), 2.59 (t,  $J = 7.4\text{Hz}$ , 2H), 2.24-2.19 (m, 2H).

$^{13}\text{C}$  NMR (100 MHz,  $\text{CDCl}_3$ )  $\delta$  171.5, 148.1, 143.6, 143.2, 141.7, 140.3, 139.7, 138.4, 136.4, 134.5, 128.0, 127.5, 127.2, 126.7, 126.3, 125.3, 125.0, 121.6, 121.4, 119.8, 119.6, 116.5, 37.3, 36.8, 35.4, 27.3.

HRMS (ESI): Calcd for  $\text{C}_{26}\text{H}_{22}\text{N}_2\text{O}$   $[\text{M}+\text{H}]^+$ : 379.1810, Found: 379.1806.

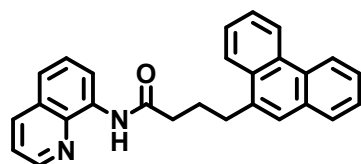

**4-(Phenanthren-9-yl)-N-(quinolin-8-yl)butanamide (P24).** The reaction mixture was stirred at 130°C for 18h. The product was purified by flash chromatography (1:20 EA/PE) as yellow solid (103 mg, 88%). Mp: 115.3-117.0 °C.

$^1\text{H}$  NMR (400 MHz,  $\text{CDCl}_3$ )  $\delta$  9.84 (s, 1H), 8.87-8.65 (m, 4H), 8.21-8.12 (m, 2H), 7.82 (d,  $J = 7.6\text{Hz}$ , 1H), 7.65-7.41 (m, 8H), 3.28 (t,  $J = 7.6\text{Hz}$ , 2H), 2.70 (t,  $J = 7.3\text{Hz}$ , 2H), 2.41-2.36 (m, 2H).

$^{13}\text{C}$  NMR (100 MHz,  $\text{CDCl}_3$ )  $\delta$  171.5, 148.2, 138.4, 136.4, 135.8, 134.6, 131.9, 131.2, 130.8, 129.9, 128.2, 128.0, 127.5, 126.8, 126.7, 126.6, 126.3, 126.1, 124.6, 123.3, 122.5, 121.6, 121.5, 116.6, 37.6, 32.8, 25.8.

HRMS (ESI): Calcd for  $\text{C}_{27}\text{H}_{22}\text{N}_2\text{O}$   $[\text{M}+\text{H}]^+$ : 391.1810, Found: 391.1807.

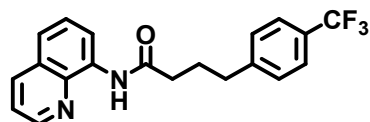

**N-(Quinolin-8-yl)-4-(4-(trifluoromethyl)phenyl)butanamide (P25).** The reaction mixture was stirred at  $130^\circ\text{C}$  for 18h. The product was purified by flash chromatography (1:20 EA/PE) as yellow solid (37 mg, 34%). While  $\text{NCCH}_2\text{COOH}$  (3 equiv, 0.9 mmol, 77mg) was added, the product was afforded in 90% yield (97 mg). Mp:  $80.0\text{--}81.5^\circ\text{C}$ .

$^1\text{H}$  NMR (400 MHz,  $\text{CDCl}_3$ )  $\delta$  9.79 (s, 1H), 8.80–8.77 (m, 2H), 8.17 (dd,  $J = 8.3\text{Hz}$ , 1.7Hz, 1H), 7.55–7.52 (m, 4H), 7.46 (dd,  $J = 8.3\text{Hz}$ , 4.2Hz, 1H), 7.35 (d,  $J = 7.9\text{Hz}$ , 2H), 2.83 (t,  $J = 7.6\text{Hz}$ , 2H), 2.59 (t,  $J = 7.3\text{Hz}$ , 2H), 2.21–2.14 (m, 2H).

$^{13}\text{C}$  NMR (100 MHz,  $\text{CDCl}_3$ )  $\delta$  171.2, 148.3, 145.8, 138.4, 136.6, 134.5, 129.0, 128.1, 127.6, 125.5, 125.4 (q,  $J = 3.6\text{Hz}$ ), 121.7 (d,  $J = 11.4\text{Hz}$ ), 116.6, 37.2, 35.1, 26.8.

$^{19}\text{F}$  NMR (376 MHz,  $\text{CDCl}_3$ )  $\delta$  -62.19.

HRMS (ESI): Calcd for  $\text{C}_{20}\text{H}_{17}\text{F}_3\text{N}_2\text{O}$   $[\text{M}+\text{H}]^+$ : 359.1371, Found: 359.1364.

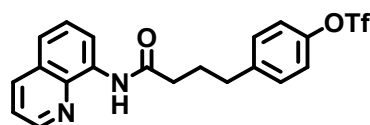

**4-(4-Oxo-4-(quinolin-8-ylamino)butyl)phenyl trifluoromethanesulfonate (P26).**

The reaction mixture was stirred at  $130^\circ\text{C}$  for 18h. The product was purified by flash chromatography (1:20 EA/PE) as yellow oil (74 mg, 56%). While  $\text{NCCH}_2\text{COOH}$  (3 equiv, 0.9 mmol, 77mg) was added, the product was afforded in 70% yield (92 mg).

$^1\text{H}$  NMR (400 MHz,  $\text{CDCl}_3$ )  $\delta$  9.80 (s, 1H), 8.80–8.77 (m, 2H), 8.16 (dd,  $J = 8.3\text{Hz}$ , 1.7Hz, 1H), 7.56–7.43 (m, 3H), 7.31–7.29 (m, 2H), 7.20–7.18 (m, 2H), 2.79 (dd,  $J = 8.5\text{Hz}$ , 6.8Hz, 2H), 2.59 (t,  $J = 7.3\text{Hz}$ , 2H), 2.18–2.11 (m, 2H).

$^{13}\text{C}$  NMR (100 MHz,  $\text{CDCl}_3$ )  $\delta$  171.1, 148.3, 148.0, 142.3, 138.4, 136.5, 134.5, 130.3, 128.1, 127.5, 121.7 (d,  $J = 10.4\text{Hz}$ ), 121.3, 120.4, 117.3, 116.6, 37.1, 34.6, 26.9.

$^{19}\text{F}$  NMR (376 MHz,  $\text{CDCl}_3$ )  $\delta$  -72.77.

HRMS (ESI): Calcd for  $\text{C}_{20}\text{H}_{17}\text{F}_3\text{N}_2\text{O}_4\text{S}$   $[\text{M}+\text{H}]^+$ : 439.0939, Found: 439.0938.

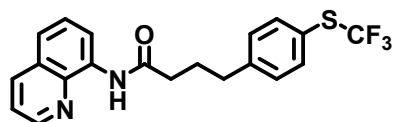

***N*-(Quinolin-8-yl)-4-(4-((trifluoromethyl)thio)phenyl)butanamide (P27).** The reaction mixture was stirred at  $130^\circ\text{C}$  for 18h. The product was purified by flash chromatography (1:20 EA/PE) as yellow solid (66 mg, 55%). While  $\text{NCCH}_2\text{COOH}$  (3 equiv, 0.9 mmol, 77mg) was added, the product was afforded in 85% yield (100 mg). Mp:  $91.2\text{--}93.0^\circ\text{C}$ .

$^1\text{H}$  NMR (400 MHz,  $\text{CDCl}_3$ )  $\delta$  9.80 (s, 1H), 8.81-8.77 (m, 2H), 8.17 (dd,  $J = 8.2\text{Hz}$ ,  $1.7\text{Hz}$ , 1H), 7.58-7.45 (m, 5H), 7.29 (d,  $J = 8.2\text{Hz}$ , 2H), 2.80 (t,  $J = 7.4\text{Hz}$ , 2H), 2.59 (t,  $J = 7.3\text{Hz}$ , 2H), 2.21-2.13 (m, 2H).

$^{13}\text{C}$  NMR (100 MHz,  $\text{CDCl}_3$ )  $\delta$  171.2, 148.3, 145.0, 138.4, 136.6 (d,  $J = 11.8\text{Hz}$ ), 134.5, 131.3, 129.9, 128.2, 128.1, 127.6, 121.7 (d,  $J = 12.5\text{Hz}$ ), 116.6, 37.2, 35.0, 26.8.

$^{19}\text{F}$  NMR (376 MHz,  $\text{CDCl}_3$ )  $\delta$  -42.99.

HRMS (ESI): Calcd for  $\text{C}_{20}\text{H}_{17}\text{F}_3\text{N}_2\text{OS}$   $[\text{M}+\text{H}]^+$ : 391.1092, Found: 391.1090.

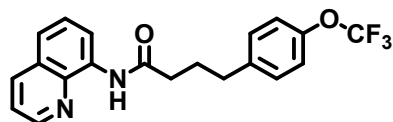

***N*-(Quinolin-8-yl)-4-(4-(trifluoromethoxy)phenyl)butanamide (P28).** The reaction mixture was stirred at  $130^\circ\text{C}$  for 18h. The product was purified by flash chromatography (1:20 EA/PE) as yellow oil (62 mg, 55%). While  $\text{NCCH}_2\text{COOH}$  (3 equiv, 0.9 mmol, 77mg) was added, the product was afforded in 82% yield (92 mg).

$^1\text{H}$  NMR (400 MHz,  $\text{CDCl}_3$ )  $\delta$  9.80 (s, 1H), 8.81-8.77 (m, 2H), 8.17 (dd,  $J = 8.2\text{Hz}$ , 1.7Hz, 1H), 7.57-7.45 (m, 3H), 7.26 (d,  $J = 6.1\text{Hz}$ , 2H), 7.14 (d,  $J = 8\text{Hz}$ , 2H), 2.78 (t,  $J = 7.6\text{Hz}$ , 2H), 2.59 (t,  $J = 7.4\text{Hz}$ , 2H), 2.19-2.11 (m, 2H).

$^{13}\text{C}$  NMR (100 MHz,  $\text{CDCl}_3$ )  $\delta$  171.3, 148.3, 147.6, 140.4, 138.4, 136.6, 134.6, 129.9, 128.1, 127.6, 121.7 (d,  $J = 14.2\text{Hz}$ ), 121.1, 119.4, 116.6, 37.3, 34.6, 27.1.

$^{19}\text{F}$  NMR (376 MHz,  $\text{CDCl}_3$ )  $\delta$  -57.79.

HRMS (ESI): Calcd for  $\text{C}_{20}\text{H}_{17}\text{F}_3\text{N}_2\text{O}_2$   $[\text{M}+\text{H}]^+$ : 375.1320, Found: 375.1317.

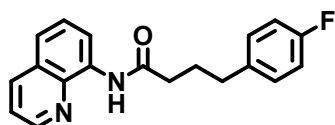

**4-(4-Fluorophenyl)-N-(quinolin-8-yl)butanamide (P29)** . The reaction mixture was stirred at  $130^\circ\text{C}$  for 18 h. The product was purified by flash chromatography (1:20 EA/PE) as yellow oil (76 mg, 82%).

$^1\text{H}$  NMR (400 MHz,  $\text{CDCl}_3$ )  $\delta$  9.79 (s, 1H), 8.80-8.78 (m, 2H), 8.14 (dd,  $J = 8.3\text{Hz}$ , 1.7 Hz, 1H), 7.56-7.42 (m, 3H), 7.20-7.16 (m, 2H), 7.00-6.95 (m, 2H), 2.73 (t,  $J = 7.6\text{Hz}$ , 2H), 2.56 (t,  $J = 7.4\text{Hz}$ , 2H), 2.16-2.09 (m, 2H).

$^{13}\text{C}$  NMR (100 MHz,  $\text{CDCl}_3$ )  $\delta$  171.3, 161.4 (d,  $J = 243.3\text{Hz}$ ), 148.2, 138.3, 137.1 (d,  $J = 3.2\text{Hz}$ ), 136.4, 134.5, 130.0 (d,  $J = 7.8\text{Hz}$ ), 128.0, 127.4, 121.6 (d,  $J = 13.8\text{Hz}$ ), 116.5, 115.3, 115.1, 37.2, 34.4, 27.2.

$^{19}\text{F}$  NMR (376 MHz,  $\text{CDCl}_3$ ):  $\delta$  -(117.45-117.53) (m).

HRMS (ESI): Calcd for  $\text{C}_{19}\text{H}_{17}\text{FN}_2\text{O}$   $[\text{M}+\text{H}]^+$ : 309.1403, Found: 309.1405.

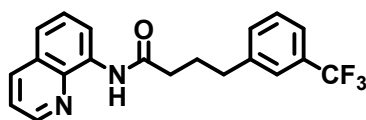

**N-(Quinolin-8-yl)-4-(3-(trifluoromethyl)phenyl)butanamide (P30)**. The reaction mixture was stirred at  $130^\circ\text{C}$  for 18h. The product was purified by flash chromatography (1:20 EA/PE) as yellow oil (90 mg, 84%). While  $\text{NCCH}_2\text{COOH}$  (3 equiv, 0.9 mmol, 77mg) was added, the product was afforded in 88% yield (95 mg).

$^1\text{H}$  NMR (400 MHz,  $\text{CDCl}_3$ )  $\delta$  9.82 (s, 1H), 8.81-8.78 (m, 2H), 8.14 (dd,  $J = 8.2\text{Hz}$ ,  $1.7\text{Hz}$ , 1H), 7.55-7.50 (m, 3H), 7.48-7.37 (m, 4H), 2.81 (t,  $J = 7.4\text{Hz}$ , 2H), 2.59 (t,  $J = 7.4\text{Hz}$ , 2H), 2.20-2.13 (m, 2H).

$^{13}\text{C}$  NMR (100 MHz,  $\text{CDCl}_3$ )  $\delta$  171.1, 148.1, 142.5, 138.2, 136.5, 134.4, 132.0, 131.2, 130.7 (q,  $J = 31.8\text{Hz}$ ), 128.9, 128.0, 127.4, 125.2 (q,  $J = 3.6\text{Hz}$ ), 122.9 (q,  $J = 3.8\text{Hz}$ ), 121.6 (d,  $J = 8.3\text{Hz}$ ), 116.5, 37.1, 35.0, 26.9.

$^{19}\text{F}$  NMR (376 MHz,  $\text{CDCl}_3$ )  $\delta$  -62.42.

HRMS (ESI): Calcd for  $\text{C}_{20}\text{H}_{17}\text{F}_3\text{N}_2\text{O}$   $[\text{M}+\text{H}]^+$ : 359.1371, Found: 359.1370.

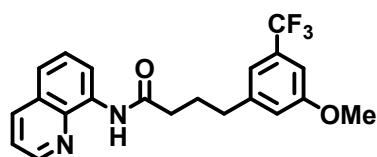

**4-(3-Methoxy-5-(trifluoromethyl)phenyl)-N-(quinolin-8-yl)butanamide (P31).**

The reaction mixture was stirred at  $130^\circ\text{C}$  for 18h. The product was purified by flash chromatography (1:20 EA/PE) as yellow oil (44 mg, 38%). While  $\text{NCCH}_2\text{COOH}$  (3 equiv, 0.9 mmol, 77mg) was added, the product was afforded in 86% yield (100 mg).

$^1\text{H}$  NMR (400 MHz,  $\text{CDCl}_3$ )  $\delta$  9.81 (s, 1H), 8.79-8.78 (m, 2H), 8.16 (d,  $J = 8.2\text{Hz}$ , 1H), 7.56-7.44 (m, 3H), 7.10 (s, 1H), 6.96 (s, 2H), 3.82 (s, 3H), 2.79 (t,  $J = 7.6\text{Hz}$ , 2H), 2.59 (t,  $J = 7.3\text{Hz}$ , 2H), 2.21-2.13 (m, 2H).

$^{13}\text{C}$  NMR (100 MHz,  $\text{CDCl}_3$ )  $\delta$  171.2, 160.0, 148.3, 144.2, 138.4, 136.5, 134.5, 131.9 (d,  $J = 31.8\text{Hz}$ ), 128.1, 127.5, 125.5, 122.8, 121.7 (d,  $J = 12.6\text{ Hz}$ ), 117.9, 117.7 (q,  $J = 3.6\text{Hz}$ ), 108.5 (q,  $J = 3.9\text{Hz}$ ), 55.6, 37.2, 35.2, 26.9.

$^{19}\text{F}$  NMR (376 MHz,  $\text{CDCl}_3$ )  $\delta$  -62.44

HRMS (ESI): Calcd for  $\text{C}_{21}\text{H}_{19}\text{F}_3\text{N}_2\text{O}_2$   $[\text{M}+\text{H}]^+$ : 389.1477, Found: 389.1473.

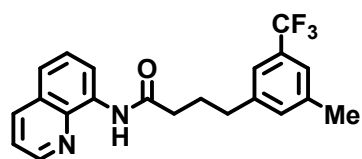

**4-(3-Methyl-5-(trifluoromethyl)phenyl)-N-(quinolin-8-yl)butanamide (P32).** The reaction mixture was stirred at  $130^\circ\text{C}$  for 18h. The product was purified by flash

chromatography (1:20 EA/PE) as yellow solid (34 mg, 30%). While NCCH<sub>2</sub>COOH (3 equiv, 0.9 mmol, 77mg) was added, the product was afforded in 82% yield (92 mg). Mp: 64.4-65.5 °C.

<sup>1</sup>H NMR (400 MHz, CDCl<sub>3</sub>) δ 9.81 (s, 1H), 8.80-8.78 (m, 2H), 8.16 (d, *J* = 8.2Hz, 1H), 7.56-7.44 (m, 3H), 7.30-7.23 (m, 3H), 2.78 (t, *J* = 7.2Hz, 2H), 2.59 (t, *J* = 7.3Hz, 2H), 2.37 (s, 3H), 2.20-2.12 (m, 2H).

<sup>13</sup>C NMR (100 MHz, CDCl<sub>3</sub>) δ 171.2, 148.3, 142.4, 139.0, 138.4, 136.5, 134.5, 132.9, 130.7 (q, *J* = 31.5Hz), 128.1, 127.6, 123.6 (q, *J* = 3.8Hz), 122.5 (q, *J* = 3.8Hz), 121.7 (d, *J* = 13.1Hz), 116.6, 37.3, 35.0, 27.0, 21.4.

<sup>19</sup>F NMR (376 MHz, CDCl<sub>3</sub>) δ -62.40.

HRMS (ESI): Calcd for C<sub>21</sub>H<sub>19</sub>F<sub>3</sub>N<sub>2</sub>O [M+H]<sup>+</sup>: 373.1528, Found: 373.1527.

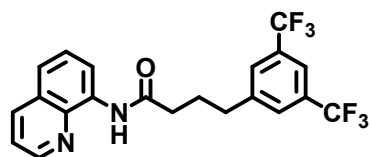

**4-(3,5-Bis(trifluoromethyl)phenyl)-N-(quinolin-8-yl)butanamide (P33).** The reaction mixture was stirred at 130°C for 18h. The product was purified by flash chromatography (1:20 EA/PE) as yellow oil (36 mg, 28%). While NCCH<sub>2</sub>COOH (3 equiv, 0.9 mmol, 77mg) was added, the product was afforded in 85% yield (109 mg).

<sup>1</sup>H NMR (400 MHz, CDCl<sub>3</sub>) δ 9.83 (s, 1H), 8.80-8.77 (m, 2H), 8.16 (d, *J* = 8.2Hz, 1H), 7.71 (d, *J* = 8.7Hz, 3H), 7.56-7.44 (m, 3H), 2.90 (t, *J* = 7.9Hz, 2H), 2.63 (t, *J* = 7.2Hz, 2H), 2.23-2.16 (m, 2H).

<sup>13</sup>C NMR (100 MHz, CDCl<sub>3</sub>) δ 170.7, 148.3, 144.2, 138.4, 136.5, 134.4, 132.2, 131.7 (q, *J* = 33.1Hz), 128.8, 128.1, 127.5, 124.9, 121.8 (d, *J* = 3.5Hz), 120.3 (q, *J* = 3.9Hz), 116.6, 37.0, 35.0, 26.8.

<sup>19</sup>F NMR (376 MHz, CDCl<sub>3</sub>) δ -62.79.

HRMS (ESI): Calcd for C<sub>21</sub>H<sub>16</sub>F<sub>6</sub>N<sub>2</sub>O [M+H]<sup>+</sup>: 427.1245, Found: 427.1239.

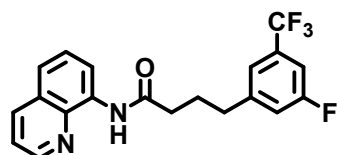

**4-(3-Fluoro-5-(trifluoromethyl)phenyl)-N-(quinolin-8-yl)butanamide (P34).** The reaction mixture was stirred at 130°C for 18h. The product was purified by flash chromatography (1:20 EA/PE) as yellow solid (72 mg, 63%). While NCCH<sub>2</sub>COOH (3 equiv, 0.9 mmol, 77mg) was added, the product was afforded in 81% yield (92 mg). Mp: 69.0-71.0 °C.

<sup>1</sup>H NMR (400 MHz, CDCl<sub>3</sub>) δ 9.81 (s, 1H), 8.81-8.77 (m, 2H), 8.16 (dd, *J* = 8.2Hz, 1.6Hz, 1H), 7.56-7.44 (m, 3H), 7.30 (s, 1H), 7.16 (d, *J* = 9.0Hz, 2H), 2.82 (t, *J* = 7.3Hz, 2H), 2.60 (t, *J* = 7.2Hz, 2H), 2.20-2.13(m, 2H).

<sup>13</sup>C NMR (100 MHz, CDCl<sub>3</sub>) δ 170.9, 162.7 (d, *J* = 248.3Hz), 148.3, 145.5 (d, *J* = 7.5Hz), 138.4, 136.5, 134.4, 132.5 (dd, *J* = 32.8Hz, 8.2Hz), 128.1, 127.5, 121.7 (d, *J* = 7.7 Hz), 121.2 (t, 3.5Hz), 119.1 (d, *J* = 21.0Hz), 116.6, 110.6 (dd, *J* = 24.5Hz, 3.8Hz), 37.0, 34.9, 26.7.

<sup>19</sup>F NMR (376 MHz, CDCl<sub>3</sub>) δ -62.66, - (111.33-111.38) (m).

HRMS (ESI): Calcd for C<sub>20</sub>H<sub>16</sub>F<sub>4</sub>N<sub>2</sub>O [M+H]<sup>+</sup>: 377.1277, Found: 377.1272.

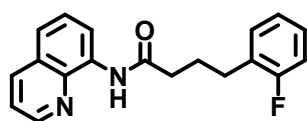

**4-(2-Fluorophenyl)-N-(quinolin-8-yl)butanamide (P35).** The reaction mixture was stirred at 130°C for 18h. The product was purified by flash chromatography (1:20 EA/PE) as yellow oil (75 mg, 81%).

<sup>1</sup>H NMR (400 MHz, CDCl<sub>3</sub>) δ 9.79 (s, 1H), 8.79-8.78 (m, 2H), 8.13 (dd, *J* = 8.3Hz, 1.7Hz, 1H), 7.60-7.38 (m, 3H), 7.26-7.14 (m, 2H), 7.08-6.99 (m, 2H), 2.80 (t, *J* = 7.5Hz, 2H), 2.59 (t, *J* = 7.6Hz, 2H), 2.15 (p, *J* = 7.6Hz, 2H).

<sup>13</sup>C NMR (100 MHz, CDCl<sub>3</sub>) δ 171.3, 161.3 (d, *J* = 244.8Hz), 148.1, 138.3, 136.4, 134.5, 130.9 (d, *J* = 5.1Hz), 128.4, 128.2, 128.0, 127.8, 127.7, 127.4, 124.0 (d, *J* = 3.5Hz), 121.5 (d, *J* = 17.7Hz), 116.5, 115.4, 115.2, 37.3, 28.4 (d, *J* = 2.3Hz), 25.8.

<sup>19</sup>F NMR (376 MHz, CDCl<sub>3</sub>) δ - (118.55-118.61) (m).

HRMS (ESI): Calcd for C<sub>19</sub>H<sub>17</sub>FN<sub>2</sub>O [M+H]<sup>+</sup>: 309.1403, Found: 309.1402.

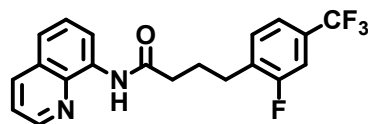

**4-(2-Fluoro-4-(trifluoromethyl)phenyl)-N-(quinolin-8-yl)butanamide (P36).** The reaction mixture was stirred at 130 °C for 18h. The product was purified by flash chromatography (1:20 EA/PE) as yellow solid (98 mg, 86%). Mp: 78.5-79.6 °C.

$^1\text{H}$  NMR (400 MHz,  $\text{CDCl}_3$ )  $\delta$  9.80 (s, 1H), 8.79-8.76 (m, 2H), 8.15 (dd,  $J$  = 8.3Hz, 1.7Hz, 1H), 7.55-7.26 (m, 6H), 2.85 (t,  $J$  = 7.6Hz, 2H), 2.60 (t,  $J$  = 7.4Hz, 2H), 2.20-2.12 (m, 2H).

$^{13}\text{C}$  NMR (100 MHz,  $\text{CDCl}_3$ )  $\delta$  170.9, 160.8 (d,  $J$  = 247.3Hz), 148.3, 138.4, 136.5, 134.5, 132.7 (d,  $J$  = 16.3Hz), 131.5 (d,  $J$  = 5.3Hz), 128.1, 127.5, 121.6 (d,  $J$  = 10.5Hz), 121.1 (t,  $J$  = 3.8Hz), 116.6, 112.8 (dd,  $J$  = 25.6Hz, 3.8Hz), 37.2, 28.5, 28.4 (d,  $J$  = 1.8Hz), 25.5.

$^{19}\text{F}$  NMR (376 MHz,  $\text{CDCl}_3$ )  $\delta$  -62.49, -(116.12 -116.17) (m).

HRMS (ESI): Calcd for  $\text{C}_{20}\text{H}_{16}\text{F}_4\text{N}_2\text{O}$   $[\text{M}+\text{H}]^+$ : 377.1277, Found: 377.1275.

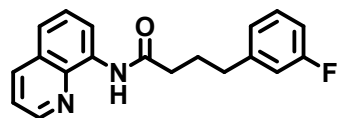

**4-(3-Fluorophenyl)-N-(quinolin-8-yl)butanamide (P37).** The reaction mixture was stirred at 130°C for 18h. The product was purified by flash chromatography (1:20 EA/PE) as yellow oil (73 mg, 79%).

$^1\text{H}$  NMR (400 MHz,  $\text{CDCl}_3$ )  $\delta$  9.71 (s, 1H), 8.71-8.69 (m, 2H), 8.06 (dd,  $J$  = 8.3Hz, 1.7Hz, 1H), 7.46-7.33 (m, 3H), 7.18-7.12 (m, 1H), 6.93-6.78 (m, 3H), 2.67 (t,  $J$  = 7.6Hz, 2H), 2.48 (t,  $J$  = 7.4Hz, 2H), 2.09-2.02 (m, 2H).

$^{13}\text{C}$  NMR (100 MHz,  $\text{CDCl}_3$ )  $\delta$  171.2, 163.0 (d,  $J$  = 245.3Hz), 148.2, 144.1 (d,  $J$  = 7.1Hz), 138.3, 136.4, 134.4, 129.8 (d,  $J$  = 8.3Hz), 128.0, 127.4, 124.2 (d,  $J$  = 2.7Hz), 121.6 (d,  $J$  = 14.6Hz), 116.5, 115.4 (d,  $J$  = 20.7Hz), 112.9 (d,  $J$  = 21.0Hz), 37.1, 34.9 (d,  $J$  = 1.8Hz), 26.8.

$^{19}\text{F}$  NMR (376 MHz,  $\text{CDCl}_3$ )  $\delta$  - (113.62-113.69) (m).

HRMS (ESI): Calcd for  $\text{C}_{19}\text{H}_{17}\text{FN}_2\text{O}$   $[\text{M}+\text{H}]^+$ : 309.1403, Found: 309.1403.



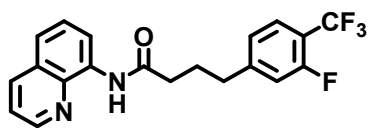

**4-(3-Fluoro-4-(trifluoromethyl)phenyl)-N-(quinolin-8-yl)butanamide (P38).** The reaction mixture was stirred at 130°C for 18h. The product was purified by flash chromatography (1:20 EA/PE) as yellow solid (41 mg, 36%). While NCCH<sub>2</sub>COOH (3 equiv, 0.9 mmol, 77mg) was added, the product was afforded in 94% yield (106 mg). Mp: 88.2-89.9 °C.

<sup>1</sup>H NMR (400 MHz, CDCl<sub>3</sub>) δ 9.80 (s, 1H), 8.81-8.76 (m, 2H), 8.17 (dd, *J* = 8.2Hz, 1.7Hz, 1H), 7.57-7.45 (m, 4H), 7.10 (t, *J* = 8.5Hz, 2H), 2.82 (t, *J* = 7.6Hz, 2H), 2.59 (t, *J* = 7.2Hz, 2H), 2.20-2.13 (m, 2H).

<sup>13</sup>C NMR (100 MHz, CDCl<sub>3</sub>) δ 170.9, 159.9 (d, *J* = 252Hz), 148.9 (d, *J* = 7.8Hz), 148.3, 138.4, 136.6, 134.4, 128.1, 127.5, 127.2 (dd, *J* = 4.5Hz, 1.8Hz), 124.3 (d, *J* = 3.5Hz), 121.8 (d, *J* = 7.9Hz), 117.0, 116.8, 116.6, 37.0, 34.9, 26.5.

<sup>19</sup>F NMR (376 MHz, CDCl<sub>3</sub>) δ -61.04, -61.08, -(114.93-115.03) (m).

HRMS (ESI): Calcd for C<sub>20</sub>H<sub>16</sub>F<sub>4</sub>N<sub>2</sub>O [M+H]<sup>+</sup>: 377.1277, Found: 377.1273.

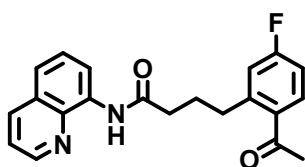

**4-(2-Acetyl-5-fluorophenyl)-N-(quinolin-8-yl)butanamide (P39).** The reaction mixture was stirred at 130°C for 18h. The product was purified by flash chromatography (1:20 EA/PE) as yellow solid (67 mg, 64%). While NCCH<sub>2</sub>COOH (3 equiv, 0.9 mmol, 77mg) was added, the product was afforded in 72% yield (76 mg). Mp: 94.2-95.7 °C.

<sup>1</sup>H NMR (400 MHz, CDCl<sub>3</sub>) δ 9.81 (s, 1H), 8.79-8.76 (m, 2H), 8.13 (dd, *J* = 8.3Hz, 1.7Hz, 1H), 7.72-7.68 (m, 1H), 7.53-7.41 (m, 3H), 7.05 (dd, *J* = 9.9Hz, 2.7Hz, 1H), 6.96-6.91 (m, 1H), 3.04-3.00 (m, 2H), 2.63 (t, *J* = 7.4Hz, 2H), 2.56 (s, 3H), 2.14-2.06 (m, 2H).

<sup>13</sup>C NMR (100 MHz, CDCl<sub>3</sub>) δ 200.2, 171.4, 165.5, 163.0, 148.2, 146.1 (d, *J* = 8.1Hz),

138.4, 136.4, 134.6, 133.7 (d,  $J = 2.9\text{Hz}$ ), 132.3 (d,  $J = 9.3\text{Hz}$ ), 128.0, 127.5, 121.6 (d,  $J = 19.2\text{Hz}$ ), 118.3 (d,  $J = 21.1\text{Hz}$ ), 116.5, 113.0 (d,  $J = 21.3\text{Hz}$ ), 37.7, 33.6, 29.8, 27.1.

$^{19}\text{F}$  NMR (376 MHz,  $\text{CDCl}_3$ )  $\delta$  - (107.28-107.34) (m).

HRMS (ESI): Calcd for  $\text{C}_{21}\text{H}_{19}\text{FN}_2\text{O}_2$   $[\text{M}+\text{H}]^+$ : 351.1509, Found: 351.1502.

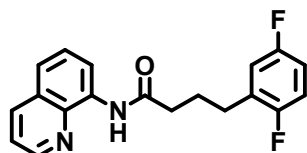

**4-(2,5-Difluorophenyl)-N-(quinolin-8-yl)butanamide (P40).** The title compound was prepared from 1,4-dibromo-2,5-difluorobenzene (1.5 equiv). The reaction mixture was stirred at  $130^\circ\text{C}$  for 18h. The product was purified by flash chromatography (1:20 EA/PE) as yellow solid (56 mg, 57%). Mp:  $90.4\text{-}92.0^\circ\text{C}$ .

$^1\text{H}$  NMR (400 MHz,  $\text{CDCl}_3$ )  $\delta$  9.80 (s, 1H), 8.80-8.77 (m, 2H), 8.16 (dd,  $J = 8.2\text{Hz}$ ,  $1.7\text{Hz}$ , 1H), 7.56-7.44 (m, 3H), 6.99-6.94 (m, 2H), 6.88-6.82 (m, 1H), 2.77 (t,  $J = 7.6\text{Hz}$ , 2H), 2.60 (t,  $J = 7.5\text{Hz}$ , 2H), 2.18-2.10 (m, 2H).

$^{13}\text{C}$  NMR (100 MHz,  $\text{CDCl}_3$ )  $\delta$  171.0, 159.2 (dd,  $J = 151\text{Hz}$ ,  $2.2\text{Hz}$ ), 156.8 (dd,  $J = 150\text{Hz}$ ,  $2.3\text{Hz}$ ), 148.2, 138.3, 136.4, 134.4, 130.0 (q,  $J = 7.0\text{Hz}$ ), 128.0, 127.4, 121.6 (d,  $J = 13.7\text{Hz}$ ), 117.0 (dd,  $J = 23.5\text{Hz}$ ,  $5.3\text{Hz}$ ), 116.5, 116.2 (dd,  $J = 25.1\text{Hz}$ ,  $8.8\text{Hz}$ ), 114.0 (dd,  $J = 23.9\text{Hz}$ ,  $8.5\text{Hz}$ ), 37.1, 28.4, 25.5.

$^{19}\text{F}$  NMR (376 MHz,  $\text{CDCl}_3$ )  $\delta$  - (119.45-119.55) (m), - (124.62-124.72) (m).

HRMS (ESI): Calcd for  $\text{C}_{19}\text{H}_{16}\text{F}_2\text{N}_2\text{O}$   $[\text{M}+\text{H}]^+$ : 327.1298, Found: 327.1295

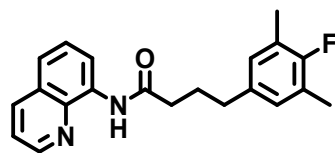

**4-(4-Fluoro-3,5-dimethylphenyl)-N-(quinolin-8-yl)butanamide (P41).** The reaction mixture was stirred at  $130^\circ\text{C}$  for 18h. The product was purified by flash chromatography (1:20 EA/PE) as yellow solid (81 mg, 80%). Mp:  $58.1\text{-}60.0^\circ\text{C}$ .

$^1\text{H}$  NMR (400 MHz,  $\text{CDCl}_3$ )  $\delta$  9.79 (s, 1H), 8.81-8.79 (m, 2H), 8.18-8.15 (m, 1H), 7.57-7.44 (m, 3H), 6.86 (d,  $J = 6.9\text{Hz}$ , 2H), 2.65 (t,  $J = 7.5\text{Hz}$ , 2H), 2.56 (t,  $J = 7.4\text{Hz}$ , 2H), 2.22 (d,  $J = 2.1\text{Hz}$ , 6H), 2.15-2.08 (m, 2H).

$^{13}\text{C}$  NMR (100 MHz,  $\text{CDCl}_3$ )  $\delta$  171.6, 158.5 (d,  $J = 240\text{Hz}$ ), 148.2, 138.4, 136.5, 136.3 (d,  $J = 4.3\text{Hz}$ ), 134.6, 128.9 (d,  $J = 4.6\text{Hz}$ ), 128.1, 127.6, 124.2 (d,  $J = 17.8\text{Hz}$ ), 121.6 (d,  $J = 18.3\text{Hz}$ ), 116.6, 37.3, 34.4, 27.3, 14.8 (d,  $J = 4.2\text{Hz}$ ).

$^{19}\text{F}$  NMR (376 MHz,  $\text{CDCl}_3$ )  $\delta$  -126.21.

HRMS (ESI): Calcd for  $\text{C}_{21}\text{H}_{21}\text{FN}_2\text{O}$   $[\text{M}+\text{H}]^+$ : 337.1716, Found: 337.1711.

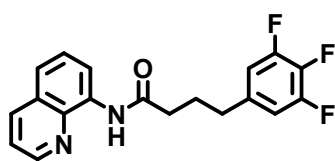

***N*-(Quinolin-8-yl)-4-(3,4,5-trifluorophenyl)butanamide (P42).** The reaction mixture was stirred at  $130^\circ\text{C}$  for 18h. The product was purified by flash chromatography (1:20 EA/PE) as yellow solid (86 mg, 83%). Mp:  $92.5\text{-}93.5^\circ\text{C}$ .

$^1\text{H}$  NMR (400 MHz,  $\text{CDCl}_3$ )  $\delta$  9.80 (s, 1H), 8.81-8.76 (m, 2H), 8.17 (dd,  $J = 8.3\text{Hz}$ ,  $1.7\text{Hz}$ , 1H), 7.54-7.45 (m, 3H), 6.87-6.83 (m, 2H), 2.70 (t,  $J = 7.6\text{Hz}$ , 2H), 2.57 (t,  $J = 7.2\text{Hz}$ , 2H), 2.15-2.07 (m, 2H).

$^{13}\text{C}$  NMR (100 MHz,  $\text{CDCl}_3$ )  $\delta$  170.9, 151.2 (dq,  $J = 250.2\text{Hz}$ ,  $4.1\text{Hz}$ ), 148.3, 139.6 (q,  $J = 11\text{Hz}$ ), 138.4, 137.9-137.8 (m), 136.6, 134.4, 128.1, 127.5, 121.8 (d,  $J = 8.0\text{Hz}$ ), 116.6, 112.5 (dd,  $J = 15.3\text{Hz}$ ,  $5.4\text{Hz}$ ), 36.9, 34.5, 26.7.

$^{19}\text{F}$  NMR (376 MHz,  $\text{CDCl}_3$ )  $\delta$  - (134.87-134.98) (m), - (164.20-164.35) (m).

HRMS (ESI): Calcd for  $\text{C}_{19}\text{H}_{15}\text{F}_3\text{N}_2\text{O}$   $[\text{M}+\text{H}]^+$ : 345.1215, Found: 345.1212.

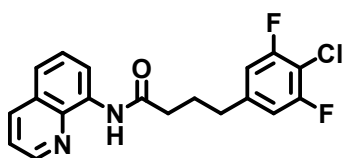

**4-(4-Chloro-3,5-difluorophenyl)-*N*-(quinolin-8-yl)butanamide (P43).** The reaction mixture was stirred at  $130^\circ\text{C}$  for 18h. The product was purified by flash chromatography (1:20 EA/PE) as yellow oil (84 mg, 78%).

$^1\text{H}$  NMR (400 MHz,  $\text{CDCl}_3$ )  $\delta$  9.79 (s, 1H), 8.81-8.76 (m, 2H), 8.17 (d,  $J = 8.3\text{Hz}$ ,

1H), 7.56-7.45 (m, 3H), 6.88 (d,  $J = 8.5\text{Hz}$ , 2H), 2.74 (t,  $J = 7.6\text{Hz}$ , 2H), 2.58 (t,  $J = 7.2\text{Hz}$ , 2H), 2.16-2.09 (m, 2H).

$^{13}\text{C}$  NMR (100 MHz,  $\text{CDCl}_3$ )  $\delta$  170.9, 158.9 (dd,  $J = 251.0\text{Hz}$ , 3.9Hz), 148.4, 142.6 (t,  $J = 9.0\text{Hz}$ ), 138.4, 136.6, 134.4, 128.1, 127.6, 121.8 (d,  $J = 7.0\text{Hz}$ ), 116.6, 112.1 (dd,  $J = 21.8\text{Hz}$ , 2.1Hz), 36.9, 34.7, 26.5.

$^{19}\text{F}$  NMR (376 MHz,  $\text{CDCl}_3$ )  $\delta$  -113.7136 (d,  $J = 7.75\text{Hz}$ ).

HRMS (ESI): Calcd for  $\text{C}_{19}\text{H}_{15}\text{ClF}_2\text{N}_2\text{O}$   $[\text{M}+\text{H}]^+$ : 361.0919, Found: 361.0920

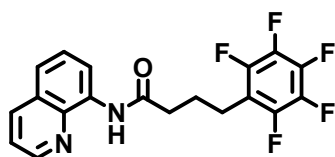

**4-(Perfluorophenyl)-N-(quinolin-8-yl)butanamide (P44).** The reaction mixture was stirred at  $130^\circ\text{C}$  for 18h. The product was purified by flash chromatography (1:20 EA/PE) as yellow solid (58 mg, 51%). Mp:  $108.2\text{-}110.0^\circ\text{C}$ .

$^1\text{H}$  NMR (400 MHz,  $\text{CDCl}_3$ )  $\delta$  9.80 (s, 1H), 8.81-8.74 (m, 2H), 8.17 (dd,  $J = 8.2\text{Hz}$ , 1.7Hz, 1H), 7.56-7.45 (m, 3H), 2.88-2.84 (m, 2H), 2.61 (t,  $J = 7.5\text{Hz}$ , 2H), 2.16-2.09 (m, 2H).

$^{13}\text{C}$  NMR (100 MHz,  $\text{CDCl}_3$ )  $\delta$  170.4, 148.1, 138.2, 136.5, 134.3, 128.0, 127.4, 121.6 (d,  $J = 3.6\text{Hz}$ ), 116.6, 36.9, 24.8, 21.8.

$^{19}\text{F}$  NMR (376 MHz,  $\text{CDCl}_3$ )  $\delta$  -(143.74-143.82) (m), -(157.42-157.53) (m), -(162.58-162.71) (m).

HRMS (ESI): Calcd for  $\text{C}_{19}\text{H}_{13}\text{F}_5\text{N}_2\text{O}$   $[\text{M}+\text{H}]^+$ : 381.1026, Found: 381.1021.

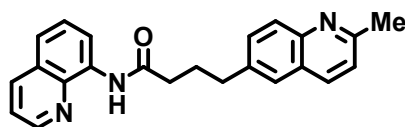

**4-(2-Methylquinolin-6-yl)-N-(quinolin-8-yl)butanamide (P45).** The reaction mixture was stirred at  $130^\circ\text{C}$  for 18h. The product was purified by flash chromatography (1:20 EA/PE) as yellow oil (51 mg, 48%). While  $\text{NCCH}_2\text{COOH}$  (3 equiv, 0.9 mmol, 77mg) was added, the product was afforded in 90% yield (96 mg).

$^1\text{H}$  NMR (400 MHz,  $\text{CDCl}_3$ )  $\delta$  9.77 (s, 1H), 8.78-8.75 (m, 2H), 8.13 (dd,  $J = 8.3\text{Hz}$ , 1.7Hz, 1H), 7.97 (dd,  $J = 13.1\text{Hz}$ , 9.2Hz, 2H), 7.59-7.41 (m, 5H), 7.24-7.22 (m, 1H), 2.92 (t,  $J = 7.5\text{Hz}$ , 2H), 2.73 (s, 3H), 2.59 (t,  $J = 7.3\text{Hz}$ , 2H), 2.27-2.20 (m, 2H).

$^{13}\text{C}$  NMR (100 MHz,  $\text{CDCl}_3$ )  $\delta$  171.3, 158.1, 148.1, 146.2, 139.2, 138.3, 136.4, 136.2, 134.4, 131.1, 128.2, 127.9, 127.4, 126.5, 126.3, 122.1, 121.6, 121.5, 116.5, 37.2, 35.0, 26.8, 25.0.

HRMS (ESI): Calcd for  $\text{C}_{23}\text{H}_{21}\text{N}_3\text{O}$   $[\text{M}+\text{H}]^+$ : 356.1763, Found: 356.1758.

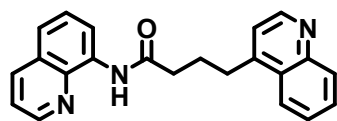

**4-(Quinolin-4-yl)-N-(quinolin-8-yl)butanamide (P46).** The reaction mixture was stirred at  $130^\circ\text{C}$  for 18h. The product was purified by flash chromatography (1:20 EA/PE) as yellow oil (64 mg, 62%). While  $\text{NCCH}_2\text{COOH}$  (3 equiv, 0.9 mmol, 77mg) was added, the product was afforded in 78% yield (80 mg).

$^1\text{H}$  NMR (400 MHz,  $\text{CDCl}_3$ )  $\delta$  9.82 (s, 1H), 8.83-8.79 (m, 3H), 8.17-8.11 (m, 3H), 7.70 (t,  $J = 7.7\text{Hz}$ , 1H), 7.57-7.44 (m, 4H), 7.31 (d,  $J = 4.4\text{Hz}$ , 1H), 3.24 (t,  $J = 7.8\text{Hz}$ , 2H), 2.69 (t,  $J = 7.1\text{Hz}$ , 2H), 2.30 (p,  $J = 7.3\text{Hz}$ , 2H).

$^{13}\text{C}$  NMR (100 MHz,  $\text{CDCl}_3$ )  $\delta$  170.8, 150.1, 148.4, 148.2, 147.6, 138.3, 136.4, 134.4, 130.2, 129.1, 128.0, 127.6, 127.4, 126.5, 123.7, 121.7, 121.6, 121.0, 116.5, 37.2, 31.5, 25.6.

HRMS (ESI): Calcd for  $\text{C}_{22}\text{H}_{19}\text{N}_3\text{O}$   $[\text{M}+\text{H}]^+$ : 342.1606, Found: 342.1604.

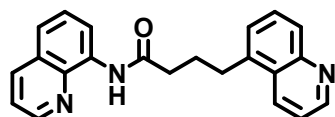

**4-(Quinolin-5-yl)-N-(quinolin-8-yl)butanamide (P47).** The reaction mixture was stirred at  $130^\circ\text{C}$  for 18h. The product was purified by flash chromatography (1:20 EA/PE) as yellow oil (51 mg, 50%). While  $\text{NCCH}_2\text{COOH}$  (3 equiv, 0.9 mmol, 77mg) was added, the product was afforded in 83% yield (85 mg).

$^1\text{H}$  NMR (400 MHz,  $\text{CDCl}_3$ )  $\delta$  9.80 (s, 1H), 8.89 (dd,  $J = 4.2\text{Hz}$ , 1.6Hz, 1H), 8.81-8.77 (m, 2H), 8.49 (d,  $J = 10.8\text{Hz}$ , 1H), 8.16 (d,  $J = 8.3\text{Hz}$ , 1H), 7.98 (d,  $J =$

8.4Hz, 1H), 7.63 (t,  $J = 8.5\text{Hz}$ ,  $7.0\text{Hz}$ , 1H), 7.57-7.49 (m, 2H), 7.46-7.39 (m, 3H), 3.23-3.19 (m, 2H), 2.67 (t,  $J = 7.1\text{Hz}$ , 2H), 2.28-2.23 (m, 2H).

$^{13}\text{C}$  NMR (100 MHz,  $\text{CDCl}_3$ )  $\delta$  171.2, 150.0, 148.8, 148.2, 138.3, 138.2, 136.4, 134.4, 132.4, 129.1, 128.2, 128.0, 127.4, 127.0, 126.7, 121.7, 126.6, 120.9, 116.5, 37.3, 31.8, 26.5.

HRMS (ESI): Calcd for  $\text{C}_{22}\text{H}_{19}\text{N}_3\text{O}$   $[\text{M}+\text{H}]^+$ : 342.1606, Found: 342.1605.

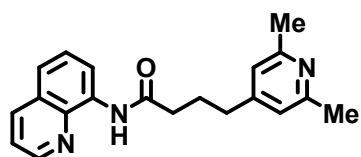

**4-(2,6-Dimethylpyridin-4-yl)-N-(quinolin-8-yl)butanamide (P48).** The reaction mixture was stirred at  $130^\circ\text{C}$  for 18h. The product was purified by flash chromatography (1:20 EA/PE) as yellow solid (72 mg, 75 %). Mp:  $82.2\text{--}84.0^\circ\text{C}$ .

$^1\text{H}$  NMR (400 MHz,  $\text{CDCl}_3$ )  $\delta$  9.77 (s, 1H), 8.79-8.75 (m, 2H), 8.14 (dd,  $J = 8.3\text{Hz}$ ,  $1.7\text{Hz}$ , 1H), 7.54-7.42 (m, 3H), 6.85 (s, 2H), 2.67 (t,  $J = 7.6\text{Hz}$ , 2H), 2.58-2.53 (m, 2H), 2.49 (s, 6H), 2.16-2.09 (m, 2H).

$^{13}\text{C}$  NMR (100 MHz,  $\text{CDCl}_3$ )  $\delta$  171.0, 157.4, 151.5, 148.2, 138.3, 136.4, 134.3, 127.9, 127.4, 121.7, 121.6, 120.8, 116.5, 37.0, 34.3, 25.9, 24.1.

HRMS (ESI): Calcd for  $\text{C}_{20}\text{H}_{21}\text{N}_3\text{O}$   $[\text{M}+\text{H}]^+$ : 320.1763, Found: 320.1765.

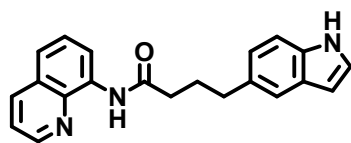

**4-(1H-Indol-5-yl)-N-(quinolin-8-yl)butanamide (P49).** The reaction mixture was stirred at  $130^\circ\text{C}$  for 18h. The product was purified by flash chromatography (1:20 EA/PE) as yellow oil (64 mg, 65 %).

$^1\text{H}$  NMR (400 MHz,  $\text{CDCl}_3$ )  $\delta$  9.81 (s, 1H), 8.83-8.79 (m, 2H), 8.23-8.14 (m, 2H), 7.56-7.43 (m, 4H), 7.33 (d,  $J = 8.3\text{Hz}$ , 1H), 7.18 (t,  $J = 2.8\text{Hz}$ , 1H), 7.10-7.08 (m, 1H), 6.50 (s, 1H), 2.87 (t,  $J = 7.4\text{Hz}$ , 2H), 2.60 (t,  $J = 7.5\text{Hz}$ , 2H), 2.26-2.18 (m, 2H).

$^{13}\text{C}$  NMR (100 MHz,  $\text{CDCl}_3$ )  $\delta$  172.0, 148.2, 138.5, 136.5, 134.7, 134.6, 132.9, 128.2, 128.1, 127.6, 124.5, 123.2, 121.7, 121.5, 120.3, 116.5, 111.1, 102.4, 37.5, 35.4, 27.9.

HRMS (ESI): Calcd for C<sub>21</sub>H<sub>19</sub>N<sub>3</sub>O [M+H]<sup>+</sup>: 330.1606, Found: 330.1608.

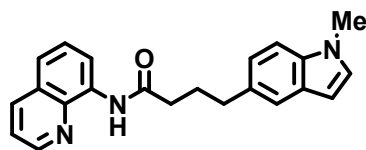

**4-(1-Methyl-1H-indol-5-yl)-N-(quinolin-8-yl)butanamide (P50).** The reaction mixture was stirred at 130°C for 18 h. The product was purified by flash chromatography (1:20 EA/PE) as yellow solid (76 mg, 74%). Mp: 62.2-64.0 °C.

<sup>1</sup>H NMR (400 MHz, CDCl<sub>3</sub>) δ 9.79 (s, 1H), 8.81-8.76 (m, 2H), 8.12 (dd, *J* = 8.2Hz, 1.7Hz, 1H), 7.59-7.31 (m, 4H), 7.29-7.20 (m, 1H), 7.12 (dd, *J* = 8.3Hz, 1.6Hz, 1H), 7.01 (d, *J* = 3.1 Hz, 1H), 6.41 (dd, *J* = 3.1Hz, 0.8 Hz, 1H), 3.75 (s, 3H), 2.86 (t, *J* = 7.4 Hz, 2H), 2.57 (t, *J* = 7.5Hz, 2H), 2.32-2.08 (m, 2H).

<sup>13</sup>C NMR (100 MHz, CDCl<sub>3</sub>) δ 171.8, 148.1, 138.4, 136.4, 135.5, 134.6, 132.3, 129.0, 128.7, 128.0, 127.5, 122.6, 121.6, 121.3, 120.3, 116.4, 109.1, 100.5, 37.4, 35.3, 32.9, 27.8.

HRMS (ESI): Calcd for C<sub>22</sub>H<sub>21</sub>N<sub>3</sub>O [M+H]<sup>+</sup>: 344.1763, Found: 344.1766.

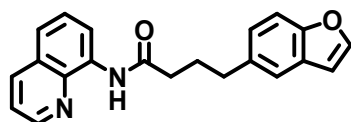

**4-(Benzofuran-5-yl)-N-(quinolin-8-yl)butanamide (P51).** The reaction mixture was stirred at 130°C for 18h. The product was purified by flash chromatography (1:20 EA/PE) as yellow solid (79 mg, 80%). Mp: 97.2-99.0 °C.

<sup>1</sup>H NMR (400 MHz, CDCl<sub>3</sub>) δ 9.79 (s, 1H), 8.80 (t, *J* = 6.6Hz, 2H), 8.15 (d, *J* = 8.2Hz, 1H), 7.80-7.34 (m, 6H), 7.18 (d, *J* = 8.5Hz, 1H), 6.71 (d, *J* = 2.2Hz, 1H), 2.87 (t, *J* = 7.5Hz, 2H), 2.59 (t, *J* = 7.4Hz, 2H), 2.24-2.17 (m, 2H).

<sup>13</sup>C NMR (100 MHz, CDCl<sub>3</sub>) δ 171.5, 153.7, 148.1, 145.1, 138.4, 136.4, 136.0, 134.5, 128.0, 127.6, 127.5, 125.1, 121.6, 121.4, 120.7, 116.5, 111.2, 106.4, 37.3, 35.1, 27.6.

HRMS (ESI): Calcd for C<sub>21</sub>H<sub>18</sub>N<sub>2</sub>O<sub>2</sub> [M+H]<sup>+</sup>: 331.1447, Found: 331.1446.

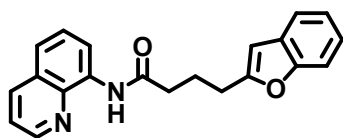

**4-(Benzofuran-2-yl)-N-(quinolin-8-yl)butanamide (P52).** The reaction mixture was stirred at 130°C for 18h. The product was purified by flash chromatography (1:20 EA/PE) as yellow solid (69 mg, 70%). Mp: 72.2-74.0 °C.

<sup>1</sup>H NMR (400 MHz, CDCl<sub>3</sub>) δ 9.82 (s, 1H), 9.01-8.63 (m, 2H), 8.12 (dd, *J* = 8.3Hz, 1.7Hz, 1H), 7.58-7.34 (m, 5H), 7.29-7.11 (m, 2H), 6.46 (s, 1H), 2.93 (t, *J* = 7.3Hz, 2H), 2.64 (t, *J* = 7.4Hz, 2H), 2.31-2.23 (m, 2H).

<sup>13</sup>C NMR (100 MHz, CDCl<sub>3</sub>) δ 171.1, 158.3, 154.8, 148.2, 138.3, 136.4, 134.5, 128.9, 128.0, 127.4, 123.3, 122.5, 121.6, 121.5, 120.3, 116.5, 110.9, 102.7, 37.0 27.8, 23.6.

HRMS (ESI): Calcd for C<sub>21</sub>H<sub>18</sub>N<sub>2</sub>O<sub>2</sub> [M+H]<sup>+</sup>: 331.1447, Found: 331.1448.

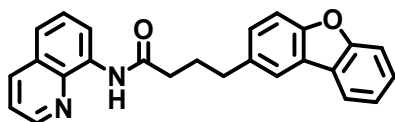

**4-(Dibenzo[*b,d*]furan-3-yl)-N-(quinolin-8-yl)butanamide (P53).** The reaction mixture was stirred at 130°C for 18h. The product was purified by flash chromatography (1:20 EA/PE) as yellow oil (94 mg, 82%).

<sup>1</sup>H NMR (400 MHz, CDCl<sub>3</sub>) δ 9.80 (s, 1H), 8.82-8.74 (m, 2H), 8.14-8.12 (m, 1H), 7.89-7.81 (m, 2H), 7.56-7.40 (m, 6H), 7.34-7.29 (m, 2H), 2.93 (t, *J* = 7.5 Hz, 2H), 2.62 (t, *J* = 7.4 Hz, 2H), 2.29-2.22 (m, 2H).

<sup>13</sup>C NMR (100 MHz, CDCl<sub>3</sub>) δ 171.4, 156.5, 154.9, 148.1, 138.3, 136.4, 136.0, 134.5, 127.9, 127.8, 127.4, 127.0, 124.3, 124.2, 122.6, 121.6, 121.5, 120.6, 120.3, 116.4, 111.6, 111.4, 37.2, 35.1, 27.6.

HRMS (ESI): Calcd for C<sub>25</sub>H<sub>20</sub>N<sub>2</sub>O<sub>2</sub> [M+H]<sup>+</sup>: 381.1603, Found: 381.1603.

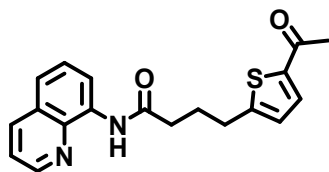

**4-(5-Acetylthiophen-2-yl)-N-(quinolin-8-yl)butanamide (P54).** The reaction



mixture was stirred at 130°C for 18h. The product was purified by flash chromatography (1:20 EA/PE) as yellow oil (40 mg, 39%). While NCCH<sub>2</sub>COOH (3 equiv, 0.9 mmol, 77mg) was added, the product was afforded in 60% yield (61 mg).

<sup>1</sup>H NMR (400 MHz, CDCl<sub>3</sub>) δ 9.81 (s, 1H), 8.81-8.75 (m, 2H), 8.17 (d, *J* = 8.3Hz, 1H), 7.56-7.45 (m, 4H), 6.89 (d, *J* = 3.8Hz, 1H), 3.01 (t, *J* = 7.5Hz, 2H), 2.63 (t, *J* = 7.3Hz, 2H), 2.51 (s, 3H), 2.26-2.18 (m, 2H).

<sup>13</sup>C NMR (100 MHz, CDCl<sub>3</sub>) δ 190.5, 170.8, 154.3, 148.1, 142.4, 138.2, 136.5, 134.3, 133.0, 128.0, 127.4, 126.2, 121.7, 121.6, 116.6, 36.7, 29.9, 26.9, 26.5.

HRMS (ESI): Calcd for C<sub>19</sub>H<sub>18</sub>N<sub>2</sub>O<sub>2</sub>S [M+H]<sup>+</sup>: 339.1167, Found: 339.1168.

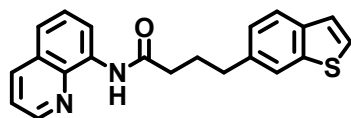

**4-(Benzo[b]thiophen-6-yl)-N-(quinolin-8-yl)butanamide (P55).** The reaction mixture was stirred at 130°C for 18h. The product was purified by flash chromatography (1:20 EA/PE) as yellow oil (91 mg, 88%).

<sup>1</sup>H NMR (400 MHz, CDCl<sub>3</sub>) δ 9.79 (s, 1H), 9.02-8.65 (m, 2H), 8.15 (dd, *J* = 8.3Hz, 1.7Hz, 1H), 7.84-7.68 (m, 2H), 7.58-7.20 (m, 6H), 2.89 (t, *J* = 7.5Hz, 2H), 2.59 (t, *J* = 7.4Hz, 2H), 2.26-2.18 (m, 2H).

<sup>13</sup>C NMR (100 MHz, CDCl<sub>3</sub>) δ 171.5, 148.3, 140.2, 138.5, 138.0, 137.9, 136.5, 134.6, 128.1, 127.6, 125.7, 125.5, 123.7, 123.6, 122.1, 121.7, 121.5, 116.6, 37.3, 35.3, 27.4.

HRMS (ESI): Calcd for C<sub>21</sub>H<sub>18</sub>N<sub>2</sub>OS [M+H]<sup>+</sup>: 347.1218, Found: 347.1224.

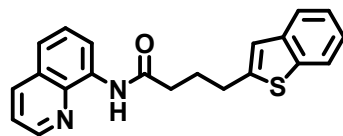

**4-(Benzo[b]thiophen-2-yl)-N-(quinolin-8-yl)butanamide (P56).** The reaction mixture was stirred at 130°C for 18h. The product was purified by flash chromatography (1:20 EA/PE) as yellow oil (61 mg, 59%).

<sup>1</sup>H NMR (400 MHz, CDCl<sub>3</sub>) δ 9.98 (s, 1H), 8.98-8.95 (m, 2H), 8.33 (dd, *J* = 8.3Hz, 1.7Hz, 1H), 7.95 (d, *J* = 7.9Hz, 1H), 7.90-7.80 (m, 1H), 7.79-7.59 (m, 3H), 7.56-7.38 (m, 3H), 3.25 (t, *J* = 7.3Hz, 2H), 2.83 (t, *J* = 7.4Hz, 2H), 2.50-2.42 (m, 2H).

$^{13}\text{C}$  NMR (100 MHz,  $\text{CDCl}_3$ )  $\delta$  171.1, 148.2, 145.3, 140.2, 139.5, 138.3, 136.4, 134.4, 128.0, 127.4, 124.1, 123.6, 122.8, 122.2, 121.6, 121.5, 121.3, 116.5, 36.8, 30.1, 26.7.

HRMS (ESI): Calcd for  $\text{C}_{21}\text{H}_{18}\text{N}_2\text{OS}$   $[\text{M}+\text{H}]^+$ : 347.1218, Found: 347.1218.

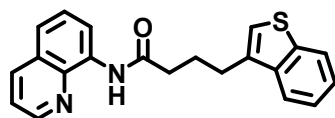

**4-(Benzo[*b*]thiophen-3-yl)-*N*-(quinolin-8-yl)butanamide (P57).** The reaction mixture was stirred at 130°C for 18h. The product was purified by flash chromatography (1:20 EA/PE) as yellow oil (69 mg, 66%).

$^1\text{H}$  NMR (400 MHz,  $\text{CDCl}_3$ )  $\delta$  9.91 (s, 1H), 8.83-8.81 (m, 2H), 8.22 (d,  $J$  = 8.1Hz, 1H), 7.87-7.81 (m, 2H), 7.60-7.47 (m, 3H), 7.39-7.31 (m, 2H), 7.19 (s, 1H), 3.02 (t,  $J$  = 7.5Hz, 2H), 2.70 (t,  $J$  = 7.2Hz, 2H), 2.33-2.26 (m, 2H).

$^{13}\text{C}$  NMR (100 MHz,  $\text{CDCl}_3$ )  $\delta$  171.5, 148.0, 140.6, 139.1, 137.1, 136.1, 134.4, 128.2, 127.8, 124.3, 124.0, 123.0, 121.9, 121.8, 121.7, 117.1, 37.5, 29.1, 25.0.

HRMS (ESI): Calcd for  $\text{C}_{21}\text{H}_{18}\text{N}_2\text{OS}$   $[\text{M}+\text{H}]^+$ : 347.1218, Found: 347.1218.

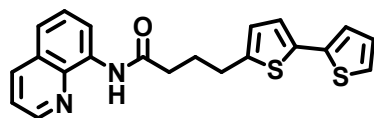

**4-([2,2'-Bithiophen]-5-yl)-*N*-(quinolin-8-yl)butanamide (P58).** While  $\text{NCCH}_2\text{COOH}$  (3 equiv, 0.9 mmol, 77mg) was added and the reaction mixture was stirred at 130°C for 18h. The product was purified by flash chromatography (1:20 EA/PE) as yellow solid (36 mg, 32%). Without the addition of  $\text{NCCH}_2\text{COOH}$ , no title compound was obtained. Mp: 112.2-114.0 °C.

$^1\text{H}$  NMR (400 MHz,  $\text{CDCl}_3$ )  $\delta$  9.81 (s, 1H), 8.79-8.77 (m, 2H), 8.15 (d,  $J$  = 6.6Hz, 1H), 7.56-7.43 (m, 3H), 7.18-7.16 (m, 1H), 7.11-7.10 (m, 1H), 7.00-6.98(m, 2H), 6.75(d,  $J$  = 3.6Hz, 1H), 2.96 (t,  $J$  = 7.4Hz, 2H), 2.64 (t,  $J$  = 7.3Hz, 2H), 2.24-2.16 (m, 2H).

$^{13}\text{C}$  NMR (100 MHz,  $\text{CDCl}_3$ )  $\delta$  171.2, 148.3, 143.7, 138.4, 137.9, 136.5, 135.4, 134.5, 128.0, 127.8, 127.5, 125.6, 124.0, 123.6, 123.3, 121.7, 121.6, 116.5, 36.9, 29.5, 27.3.

HRMS (ESI): Calcd for  $\text{C}_{21}\text{H}_{18}\text{N}_2\text{OS}_2$   $[\text{M}+\text{H}]^+$ : 379.0939, Found: 379.0940.

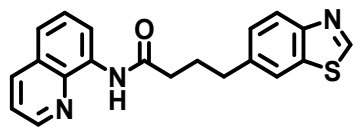

**4-(Benzo[*d*]thiazol-6-yl)-*N*-(quinolin-8-yl)butanamide (P59).** The reaction mixture was stirred at 130°C for 18h. The product was purified by flash chromatography (1:20 EA/PE) as yellow oil (49 mg, 47%). While NCCH<sub>2</sub>COOH (3 equiv, 0.9 mmol, 77mg) was added, the product was afforded in 94% yield (98 mg).

<sup>1</sup>H NMR (400 MHz, CDCl<sub>3</sub>) δ 9.79 (s, 1H), 8.92 (s, 1H), 8.83-8.71 (m, 2H), 8.14 (dd, *J* = 8.3Hz, 1.7Hz, 1H), 8.05 (d, *J* = 8.4Hz, 1H), 7.81 (d, *J* = 1.6Hz, 1H), 7.59-7.34 (m, 4H), 2.91 (t, *J* = 7.5Hz, 2H), 2.59 (t, *J* = 7.3Hz, 2H), 2.26-2.18 (m, 2H).

<sup>13</sup>C NMR (100 MHz, CDCl<sub>3</sub>) δ 171.2, 153.3, 151.8, 148.2, 139.4, 138.3, 136.4, 134.4, 134.0, 127.9, 127.4, 127.3, 123.4, 121.6, 121.5, 121.3, 116.5, 37.1, 35.1, 27.2.

HRMS (ESI): Calcd for C<sub>20</sub>H<sub>17</sub>N<sub>3</sub>OS [M+H]<sup>+</sup>: 348.1171, Found: 348.1168.

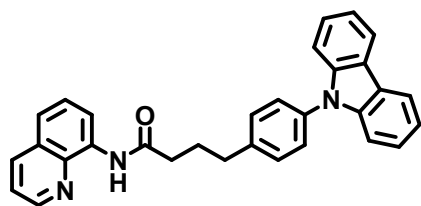

**4-(4-(9*H*-Carbazol-9-yl)phenyl)-*N*-(quinolin-8-yl)butanamide (P60).** The reaction mixture was stirred at 130°C for 18h. The product was purified by flash chromatography (1:20 EA/PE) as yellow oil (105 mg, 77%).

<sup>1</sup>H NMR (400 MHz, CDCl<sub>3</sub>) δ 9.90 (s, 1H), 8.99-8.77 (m, 2H), 8.26-8.06 (m, 3H), 7.59-7.39 (m, 11H), 7.38-7.28 (m, 2H), 2.91 (t, *J* = 7.6 Hz, 2H), 2.70 (t, *J* = 7.3 Hz, 2H), 2.33-2.26 (m, 2H).

<sup>13</sup>C NMR (100 MHz, CDCl<sub>3</sub>) δ 171.4, 148.2, 141.0, 141.0, 138.4, 136.5, 135.6, 134.5, 130.0, 128.0, 127.5, 127.1, 126.0, 123.3, 121.7, 121.6, 120.3, 119.9, 116.6, 109.9, 37.4, 35.0, 27.1.

HRMS (ESI): Calcd for C<sub>31</sub>H<sub>25</sub>N<sub>3</sub>O [M+H]<sup>+</sup>: 456.2076, Found: 456.2079.

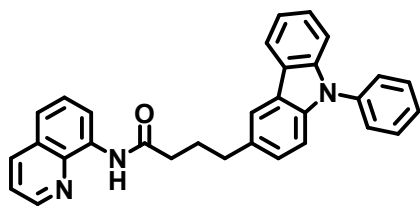

**4-(9-Phenyl-9H-carbazol-3-yl)-N-(quinolin-8-yl)butanamide (P61).** The reaction mixture was stirred at 130°C for 18h. The product was purified by flash chromatography (1:20 EA/PE) as yellow oil (109 mg, 80%).

$^1\text{H}$  NMR (400 MHz,  $\text{CDCl}_3$ )  $\delta$  9.86 (s, 1H), 8.88 (d,  $J = 7.6$  Hz, 1H), 8.75 (dd,  $J = 4.3$  Hz, 1.7 Hz, 1H), 8.15-8.06 (m, 3H), 7.63-7.54 (m, 5H), 7.49-7.43 (m, 4H), 7.41-7.38 (m, 2H), 7.35-7.29 (m, 2H), 3.01 (t,  $J = 7.4$  Hz, 2H), 2.67 (t,  $J = 7.3$  Hz, 2H), 2.37-2.29 (m, 2H).

$^{13}\text{C}$  NMR (100 MHz,  $\text{CDCl}_3$ )  $\delta$  171.7, 148.2, 141.1, 139.6, 138.3, 137.9, 136.4, 134.6, 133.2, 129.9, 128.0, 127.5, 127.3, 127.0, 126.8, 125.9, 123.6, 123.3, 121.6, 121.5, 120.4, 120.0, 119.9, 116.5, 109.8, 37.4, 35.3, 27.8.

HRMS (ESI): Calcd for  $\text{C}_{31}\text{H}_{25}\text{N}_3\text{O}$   $[\text{M}+\text{H}]^+$ : 456.2076, Found: 456.2075.

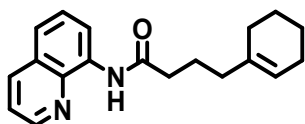

**4-(Cyclohex-1-en-1-yl)-N-(quinolin-8-yl)butanamide (P62).** The reaction mixture was stirred at 130°C for 18h. The product was purified by flash chromatography (1:20 EA/PE) as yellow oil (43 mg, 70%).

$^1\text{H}$  NMR (400 MHz,  $\text{CDCl}_3$ )  $\delta$  9.80 (s, 1H), 8.81-8.78 (m, 2H), 8.16 (dd,  $J = 8.4$  Hz, 1.6 Hz, 1H), 7.56-7.44 (m, 3H), 5.47-5.46 (m, 1H), 2.53 (m,  $J = 7.6$  Hz, 2H), 2.10-2.06 (m, 2H), 2.00-1.89 (m, 6H), 1.62-1.60 (m, 2H), 1.58-1.52 (m, 2H).

$^{13}\text{C}$  NMR (100 MHz,  $\text{CDCl}_3$ )  $\delta$  172.1, 148.2, 138.5, 136.9, 136.5, 134.7, 128.1, 127.6, 122.1, 121.7, 121.5, 116.5, 37.7, 37.6, 28.2, 25.4, 23.6, 23.1, 22.7.

HRMS (ESI): Calcd for  $\text{C}_{19}\text{H}_{22}\text{N}_2\text{O}$   $[\text{M}+\text{H}]^+$ : 295.1399, Found: 295.1398.

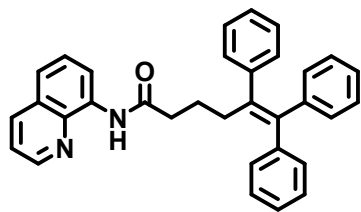

**5,6,6-Triphenyl-N-(quinolin-8-yl)hex-5-enamide (P63).** The reaction mixture was stirred at 130°C for 18h. The product was purified by flash chromatography (1:20 EA/PE) as yellow oil (112 mg, 80%).

$^1\text{H}$  NMR (400 MHz,  $\text{CDCl}_3$ )  $\delta$  9.66 (s, 1H), 8.80-8.63 (m, 2H), 8.10 (dd,  $J$  = 8.2Hz, 1.7Hz, 1H), 7.58-7.35 (m, 3H), 7.26-7.05 (m, 10H), 7.03-6.94 (m, 3H), 6.94-6.83 (m, 2H), 2.76-2.56 (m, 2H), 2.43 (t,  $J$  = 7.7Hz, 2H), 1.89-1.85 (m, 2H).

$^{13}\text{C}$  NMR (100 MHz,  $\text{CDCl}_3$ )  $\delta$  171.34, 148.1, 143.2, 142.8, 142.0, 140.0, 139.9, 138.30, 136.4, 134.5, 130.7, 129.6, 129.4, 128.3, 128.0, 127.9, 127.5, 126.7, 126.4, 125.9, 121.6, 121.4, 116.4, 38.1, 35.3, 25.1.

HRMS (ESI): Calcd for  $\text{C}_{33}\text{H}_{28}\text{N}_2\text{O}$   $[\text{M}+\text{H}]^+$ : 469.2280, Found: 469.2286.

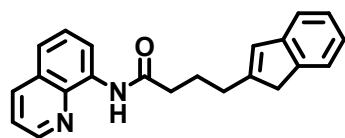

**4-(1H-Inden-2-yl)-N-(quinolin-8-yl)butanamide (P64).** The reaction mixture was stirred at 130°C for 18h. The product was purified by flash chromatography (1:20 EA/PE) as yellow oil (65 mg, 66%).

$^1\text{H}$  NMR (400 MHz,  $\text{CDCl}_3$ )  $\delta$  9.82 (s, 1H), 8.82-8.75 (m, 2H), 8.16 (dd,  $J$  = 8.3 Hz, 1.7 Hz, 1H), 7.58-7.42 (m, 3H), 7.39 (d,  $J$  = 7.4 Hz, 1H), 7.32-7.18 (m, 2H), 7.13-7.09 (m, 1H), 6.60 (s, 1H), 3.36 (s, 2H), 2.71-2.53 (m, 4H), 2.19-2.12 (m, 2H).

$^{13}\text{C}$  NMR (100 MHz,  $\text{CDCl}_3$ )  $\delta$  171.4, 149.4, 148.1, 145.5, 143.1, 138.3, 136.4, 134.5, 128.0, 127.4, 127.1, 126.3, 123.8, 123.5, 121.6, 121.4, 120.0, 116.4, 41.0, 37.5, 30.6, 24.8.

HRMS (ESI): Calcd for  $\text{C}_{22}\text{H}_{20}\text{N}_2\text{O}$   $[\text{M}+\text{H}]^+$ : 329.1654, Found: 329.1655.

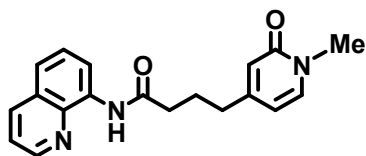

**4-(1-Methyl-2-oxo-1,2-dihydropyridin-4-yl)-N-(quinolin-8-yl)butanamide (P65).**

The reaction mixture was stirred at 130°C for 18h. The product was purified by flash chromatography (1:20 EA/PE) as yellow oil (77 mg, 80%).

$^1\text{H}$  NMR (400 MHz,  $\text{CDCl}_3$ )  $\delta$  9.78 (s, 1H), 8.90-8.54 (m, 2H), 8.12 (dd,  $J = 8.3\text{Hz}$ , 1.7Hz, 1H), 7.61-7.35 (m, 3H), 7.17 (d,  $J = 6.9\text{Hz}$ , 1H), 6.42 (d,  $J = 1.8\text{Hz}$ , 1H), 6.05 (dd,  $J = 6.9\text{Hz}$ , 1.9Hz, 1H), 3.47 (s, 3H), 2.65-2.39 (m, 4H), 2.11-2.03 (m, 2H).

$^{13}\text{C}$  NMR (100 MHz,  $\text{CDCl}_3$ )  $\delta$  170.9, 163.2, 154.4, 148.2, 138.2, 137.7, 136.4, 134.3, 127.9, 127.3, 121.7, 121.6, 118.7, 116.4, 107.5, 37.3, 36.9, 34.4, 24.8.

HRMS (ESI): Calcd for  $\text{C}_{19}\text{H}_{19}\text{N}_3\text{O}_2$   $[\text{M}+\text{H}]^+$ : 322.1556, Found: 322.1555.

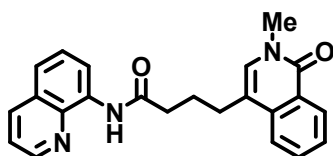

**4-(2-Methyl-1-oxo-1,2-dihydroisoquinolin-4-yl)-N-(quinolin-8-yl)butanamide (P66).**

The reaction mixture was stirred at 130°C for 18h. The product was purified by flash chromatography (1:20 EA/PE) as yellow oil (45 mg, 40%).

$^1\text{H}$  NMR (400 MHz,  $\text{CDCl}_3$ )  $\delta$  9.82 (s, 1H), 8.89-8.69 (m, 2H), 8.47 (dd,  $J = 8.0\text{ Hz}$ , 1.3 Hz, 1H), 8.18 (dd,  $J = 8.3$ , 1.7 Hz, 1H), 7.74 (d,  $J = 8.1\text{ Hz}$ , 1H), 7.69-7.65 (m, 1H), 7.61-7.40 (m, 4H), 6.97 (s, 1H), 3.55 (s, 3H), 2.84 (t,  $J = 7.6\text{ Hz}$ , 2H), 2.67 (t,  $J = 7.1\text{ Hz}$ , 2H), 2.23-2.16 (m, 2H).

$^{13}\text{C}$  NMR (100 MHz,  $\text{CDCl}_3$ )  $\delta$  171.1, 162.3, 148.2, 138.3, 136.5, 136.5, 134.3, 132.0, 130.6, 128.3, 128.0, 127.5, 126.6, 126.2, 122.9, 121.7, 121.6, 116.5, 115.4, 37.2, 36.9, 28.8, 25.2.

HRMS (ESI): Calcd for  $\text{C}_{23}\text{H}_{21}\text{N}_3\text{O}_2$   $[\text{M}+\text{H}]^+$ : 356.1763, Found: 356.1758.

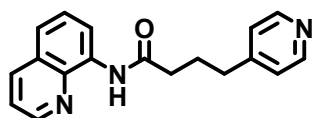

**4-(Pyridin-4-yl)-N-(quinolin-8-yl)butanamide (P67).** The title compound was

prepared from 1-benzyl-4-bromo-1,2,3,6-tetrahydropyridine (1.5 equiv). The reaction mixture was stirred at 130°C for 18h. The product was purified by flash chromatography (1:20 EA/PE) as yellow oil (53 mg, 60%).

$^1\text{H}$  NMR (400 MHz,  $\text{CDCl}_3$ )  $\delta$  9.74 (s, 1H), 8.84-8.65 (m, 2H), 8.49 (s, 2H), 8.11 (d,  $J$  = 8.3Hz, 1H), 7.55-7.34 (m, 3H), 7.29 (d,  $J$  = 4.7Hz, 2H), 2.79 (t,  $J$  = 6.8Hz, 2H), 2.55 (t,  $J$  = 7.2Hz, 2H), 2.22-2.15 (m, 2H).

$^{13}\text{C}$  NMR (100 MHz,  $\text{CDCl}_3$ )  $\delta$  170.6, 154.0, 148.2, 147.1, 138.2, 136.5, 134.2, 128.0, 127.4, 124.9, 121.7, 116.5, 36.8, 34.7, 25.7.

HRMS (ESI): Calcd for  $\text{C}_{18}\text{H}_{17}\text{N}_3\text{O}$   $[\text{M}+\text{H}]^+$ : 292.1450, Found: 292.1453.

*Typical procedure for reductive Heck reaction of various aryl chlorides:* In an argon atmosphere, a dry 25-mL Schlenk tube containing a magnetic stirbar was charged with  $[\text{PdCl}(\text{C}_3\text{H}_5)]_2$  (5 mol%, 5.7 mg, 0.015 mmol), cataCXium<sup>®</sup>PCy (10 mol%, 10.2 mg, 0.03 mmol), alkenes **S2** (1 equiv, 0.3 mmol, 63.6 mg), LiOAc (3 equiv, 0.9 mmol, 20 mg), aryl chlorides (1.5 equiv, 0.45 mmol), dry 2,3-butanediol (3 mL) and  $\text{H}_2\text{O}$  (20 equiv, 6 mmol, 108  $\mu\text{L}$ ). The tube was capped tightly and the mixture was vigorously stirred in a *pre*-warmed 130°C oil bath. After alkenes was almost fully consumed (monitored by GCMS), the reaction mixture was concentrated on a rotary evaporator and then distilled under vacuum, the resulting residue was directly subjected to flash silica gel chromatography. The structure of the desired product was confirmed by  $^1\text{H}$  and  $^{13}\text{C}$  NMR spectroscopy of the purified sample. The typical procedure using 0.3 mmol of alkenes was applied for all the isolation, unless stated otherwise.

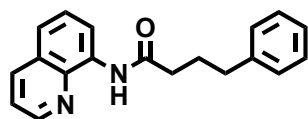

**5-Phenyl-N-(quinolin-8-yl)butanamide (P68).** The reaction mixture was stirred at 130°C for 18h. The product was purified by flash chromatography (1:20 EA/PE) as yellow oil (52 mg, 59%).

HRMS (ESI): Calcd for  $\text{C}_{19}\text{H}_{18}\text{N}_2\text{O}$   $[\text{M}+\text{H}]^+$ : 291.1497, Found: 291.1499.

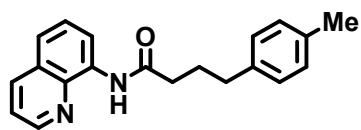

**N-(Quinolin-8-yl)-4-(p-tolyl)butanamide (P69).** The reaction mixture was stirred at 130°C for 18h. The product was purified by flash chromatography (1:20 EA/PE) as yellow oil (44 mg, 48%).

HRMS (ESI): Calcd for  $C_{20}H_{20}N_2O$   $[M+H]^+$ : 305.1654, Found: 305.1653.

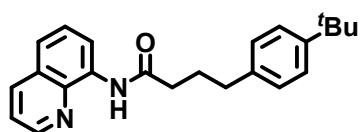

**4-(4-(tert-Butyl)phenyl)-N-(quinolin-8-yl)butanamide (P70).** The reaction mixture was stirred at 130°C for 18h. The product was purified by flash chromatography (1:20 EA/PE) as yellow oil (75 mg, 72%).

HRMS (ESI): Calcd for  $C_{23}H_{26}N_2O$   $[M+H]^+$ : 347.2123, found: 347.2121.

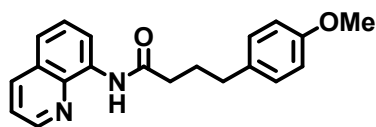

**4-(4-Methoxyphenyl)-N-(quinolin-8-yl)butanamide (P71).** The reaction mixture was stirred at 130°C for 18h. The product was purified by flash chromatography (1:20 EA/PE) as yellow oil (52 mg, 54%).

HRMS (ESI): Calcd for  $C_{20}H_{20}N_2O_2$   $[M+H]^+$ : 321.1603, Found: 321.1601.

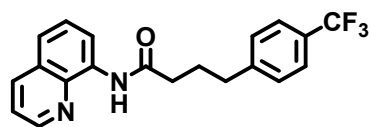

**N-(Quinolin-8-yl)-4-(4-(trifluoromethyl)phenyl)butanamide (P72).** The reaction mixture was stirred at 130°C for 18h. The product was purified by flash chromatography (1:20 EA/PE) as yellow solid (87 mg, 81%).

HRMS (ESI): Calcd for  $C_{20}H_{17}F_3N_2O$   $[M+H]^+$ : 359.1371, Found: 359.1364.



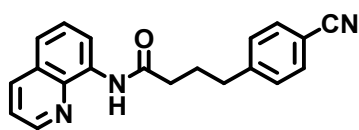

**4-(4-Cyanophenyl)-N-(quinolin-8-yl)butanamide (P73)** . The reaction mixture was stirred at 130°C for 18h. The product was purified by flash chromatography (1:10 EA/PE) as brown solid (36 mg, 38%). While NCCH<sub>2</sub>COOH (3 equiv, 0.9 mmol, 77mg) was added, the product was afforded in 74% yield (70 mg).

HRMS (ESI): Calcd for C<sub>20</sub>H<sub>17</sub>N<sub>3</sub>O [M+H]<sup>+</sup>: 316.1450, Found: 316.1448.

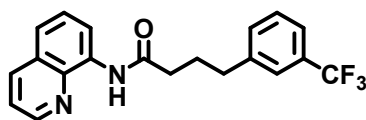

**N-(Quinolin-8-yl)-4-(3-(trifluoromethyl)phenyl)butanamide (P74)**. The reaction mixture was stirred at 130°C for 18h. The product was purified by flash chromatography (1:20 EA/PE) as yellow oil (62 mg, 57%).

HRMS (ESI): Calcd for C<sub>20</sub>H<sub>17</sub>F<sub>3</sub>N<sub>2</sub>O [M+H]<sup>+</sup>: 359.1371, Found: 359.1370.

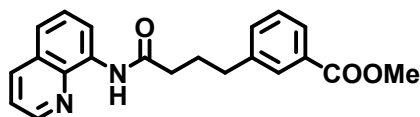

**Methyl 3-(4-oxo-4-(quinolin-8-ylamino)butyl)benzoate (P75)**. The reaction mixture was stirred at 130°C for 18h. The product was purified by flash chromatography (1:30 EA/PE) as yellow oil (52 mg, 50%).

HRMS (ESI): Calcd for [M+H]<sup>+</sup>: C<sub>21</sub>H<sub>20</sub>N<sub>2</sub>O<sub>3</sub> [M+H]<sup>+</sup>: 349.1552 , Found: 349.1555.

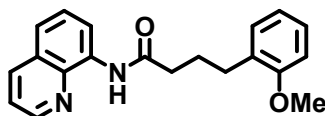

**4-(2-Methoxyphenyl)-N-(quinolin-8-yl)butanamide (P76)**. The reaction mixture was stirred at 130°C for 18h. The product was purified by flash chromatography (1:30 EA/PE) as yellow oil (58 mg, 61%).

HRMS (ESI): Calcd for C<sub>20</sub>H<sub>20</sub>N<sub>2</sub>O<sub>2</sub> [M+H]<sup>+</sup>: 321.1603, Found: 321.1599.

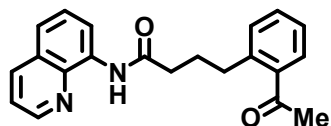

**5-(2-Acetylphenyl)-N-(quinolin-8-yl)butanamide (P77).** The reaction mixture was stirred at 130°C for 18h. The product was purified by flash chromatography (1:20 EA/PE) as yellow oil (72 mg, 72%). While  $\text{NCCH}_2\text{COOH}$  (3 equiv, 0.9 mmol, 77mg) was added, the product was afforded in 81% yield (81 mg).

HRMS (ESI): Calcd for  $\text{C}_{21}\text{H}_{20}\text{N}_2\text{O}_2$   $[\text{M}+\text{H}]^+$ : 333.1603 , Found: 333.1609.

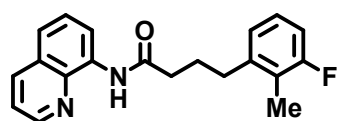

**4-(3-Fluoro-2-methylphenyl)-N-(quinolin-8-yl)butanamide (P78).** The reaction mixture was stirred at 130°C for 18h. The product was purified by flash chromatography (1:20 EA/PE) as yellow oil (77 mg, 68%).

$^1\text{H}$  NMR (400 MHz,  $\text{CDCl}_3$ )  $\delta$  9.79 (s, 1H), 8.79-8.74 (m, 2H), 8.17-8.08 (m, 1H), 7.54-7.44 (m, 3H), 7.13-7.03 (m, 1H), 6.97 (d,  $J$  = 8.8Hz, 1H), 6.89-6.84 (m, 1H), 2.77 (t,  $J$  = 6.5Hz, 2H), 2.62 (t,  $J$  = 4.7Hz, 2H), 2.33 (d,  $J$  = 1.2Hz, 3H), 2.16-2.04 (m, 2H).

$^{13}\text{C}$  NMR (100 MHz,  $\text{CDCl}_3$ )  $\delta$  171.3, 161.6 (d,  $J$  = 242Hz), 148.2, 142.4 (d,  $J$  = 4.5Hz), 138.4, 136.5, 134.5, 128.0, 127.5, 126.6 (d,  $J$  = 9.0Hz), 124.6 (d,  $J$  = 2.6Hz), 123.3 (d,  $J$  = 16.2Hz), 121.7, 121.6, 116.6, 112.8 (d,  $J$  = 23Hz) 37.5, 32.6 (d,  $J$  = 2.8 Hz), 25.9, 10.5 (d,  $J$  = 5.9 Hz).

$^{19}\text{F}$  NMR (376 MHz,  $\text{CDCl}_3$ )  $\delta$  -116.38.

HRMS (ESI): Calcd for  $\text{C}_{20}\text{H}_{19}\text{FN}_2\text{O}$   $[\text{M}+\text{H}]^+$ : 323.1560 , Found: 323.1565.

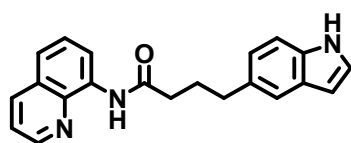

**4-(1H-Indol-5-yl)-N-(quinolin-8-yl)butanamide (P79).** The reaction mixture was stirred at 130°C for 18h. The product was purified by flash chromatography (1:20 EA/PE) as yellow oil (59 mg, 60 %).

HRMS (ESI): Calcd for  $\text{C}_{21}\text{H}_{19}\text{N}_3\text{O}$   $[\text{M}+\text{H}]^+$ : 330.1606, Found: 330.1608.

## V. Pd-catalyzed intermolecular reductive Heck reaction of various alkenes

*General Procedure A* : In an argon atmosphere, a dry 25-mL Schlenk tube containing a magnetic stirbar was charged with  $[\text{PdCl}(\text{C}_3\text{H}_5)]_2$  (5 mol%, 5.7 mg, 0.015 mmol), cataCXium®PCy (10 mol%, 10.2 mg, 0.01 mmol), alkenes (1 equiv, 0.3 mmol), LiOAc (3 equiv, 0.9 mmol, 60 mg), PhBr (1.5 equiv, 0.45 mmol), dry 2,3-butanediol (3 mL) and  $\text{H}_2\text{O}$  (20 equiv, 6 mmol, 108  $\mu\text{L}$ ). The tube was capped tightly and the mixture was vigorously stirred in a *pre*-warmed 130°C oil bath. After alkenes was almost fully consumed (monitored by GCMS), the reaction mixture was concentrated on a rotary evaporator and then distilled under reduced pressure and the resulting residue was directly subjected to silica gel flash chromatography. The structure of the desired product was confirmed by  $^1\text{H}$  NMR spectroscopy of the purified sample.

*General Procedure B* : In an argon atmosphere, a dry 25-mL Schlenk tube containing a magnetic stirbar was charged with  $[\text{PdCl}(\text{C}_3\text{H}_5)]_2$  (5 mol%, 5.7 mg, 0.015 mmol), cataCXium®PCy (10 mol%, 10.2 mg, 0.03 mmol), alkenes (1 equiv, 0.3 mmol),  $\text{Cs}_2\text{CO}_3$  (5 equiv, 1.5 mmol), PhBr (1.5 equiv, 0.45 mmol), dry 2,3-butanediol (3 mL), cyanoacetic acid (3 equiv, 0.9 mmol, 76.8 mg) and  $\text{H}_2\text{O}$  (20 equiv, 6 mmol, 108  $\mu\text{L}$ ). The tube was capped tightly and the mixture was vigorously stirred in a *pre*-warmed 130°C oil bath. After alkenes was almost fully consumed (monitored by GCMS), the reaction mixture was concentrated on a rotary evaporator and then distilled under reduced pressure and the resulting residue was directly subjected to silica gel flash chromatography. The structure of the desired product was confirmed by  $^1\text{H}$  NMR spectroscopy of the purified sample.

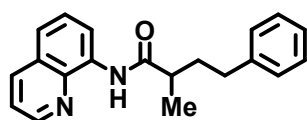

**2-Methyl-4-phenyl-N-(quinolin-8-yl)butanamide (P80).** According to the general procedure A. The reaction mixture was stirred at 130°C for 18h. The product was purified by flash chromatography (1:50 EA/PE) as yellow oil (78 mg, 85%).

$^1\text{H}$  NMR (400 MHz,  $\text{CDCl}_3$ ):  $\delta$  9.88 (s, 1H), 8.84-8.81 (m, 2H), 8.18 (dd,  $J = 8.3\text{Hz}$ , 1.6Hz, 1H), 7.58-7.50 (m, 2H), 7.47 (dd,  $J = 8.2\text{Hz}$ , 4.2Hz, 1H), 7.30-7.17 (m, 5H), 2.81-2.59 (m, 3H), 2.26-2.17 (m, 1H), 1.90-1.81 (m, 1H), 1.36 (d,  $J = 6.9\text{Hz}$ , 3H).

$^{13}\text{C}$  NMR (100 MHz,  $\text{CDCl}_3$ ):  $\delta$  175.1, 148.2, 141.8, 138.5, 136.4, 134.6, 128.5, 128.4, 128.0, 127.5, 125.9, 121.6, 121.5, 116.5, 42.3, 36.1, 33.6, 18.3.

HRMS (ESI): Calcd for  $\text{C}_{20}\text{H}_{20}\text{N}_2\text{O}$   $[\text{M}+\text{H}]^+$ : 305.1654, Found: 305.1654.

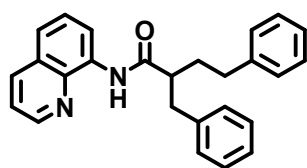

**2-Benzyl-4-phenyl-*N*-(quinolin-8-yl)butanamide (P81).** According to the general procedure A. The reaction mixture was stirred at  $130^\circ\text{C}$  for 18h. The product was purified by flash chromatography (1:50 EA/PE) as yellow oil (96 mg, 84%).

$^1\text{H}$  NMR (400 MHz,  $\text{CDCl}_3$ ):  $\delta$  9.70 (s, 1H), 8.82 -8.74 (m, 2H), 8.13 (dd,  $J = 8.3\text{Hz}$ , 1.5Hz, 1H), 7.55-7.41 (m, 3H), 7.27-7.10 (m, 10H), 3.17 (q,  $J = 7.2\text{Hz}$ , 1H), 2.92-2.74 (m, 3H), 2.69-2.61 (m, 1H), 2.26-2.16 (m, 1H), 2.00-1.88 (m, 1H).

$^{13}\text{C}$  NMR (100 MHz,  $\text{CDCl}_3$ ):  $\delta$  173.6, 148.1, 141.6, 139.4, 138.4, 136.3, 134.3, 129.0, 128.5, 128.4(4), 128.4(2), 127.9, 127.4, 126.3, 125.9, 121.6, 121.5, 116.6, 50.4, 39.3, 34.2, 33.6.

HRMS (ESI): Calcd for  $\text{C}_{26}\text{H}_{24}\text{N}_2\text{O}$   $[\text{M}+\text{H}]^+$ : 381.1967, Found: 381.1960.

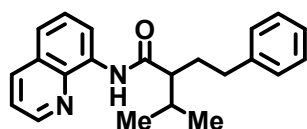

**2-Isopropyl-4-phenyl-*N*-(quinolin-8-yl)butanamide (P82).** According to the general procedure A. The reaction mixture was stirred at  $130^\circ\text{C}$  for 18h. The product was purified by flash chromatography (1:50 EA/PE) as yellow oil (90 mg, 90 %).

$^1\text{H}$  NMR (400 MHz,  $\text{CDCl}_3$ ):  $\delta$  9.84 (s, 1H), 8.89-8.81 (m, 2H), 8.17 (dd,  $J = 8.2\text{Hz}$ , 1H), 7.58-7.45 (m, 3H), 7.28-7.24 (m, 2H), 7.22-7.16 (m, 3H), 2.83-2.76 (m, 1H), 2.62-2.55 (m, 1H), 2.24-1.91 (m, 4H), 1.03 (d,  $J = 3.3\text{Hz}$ , 6H).

$^{13}\text{C}$  NMR (100 MHz,  $\text{CDCl}_3$ ):  $\delta$  174.1, 148.2, 142.0, 138.5, 136.4, 134.4, 128.6, 128.4, 128.0, 127.5, 125.9, 121.6, 121.5, 116.5, 55.7, 34.0, 32.1, 31.3, 21.0, 20.4.

HRMS (ESI): Calcd for  $\text{C}_{22}\text{H}_{24}\text{N}_2\text{O}$   $[\text{M}+\text{H}]^+$ : 333.1967, Found: 333.1966.

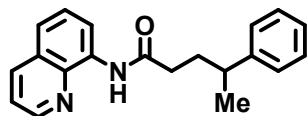

**4-Phenyl-N-(quinolin-8-yl)pentanamide (P83).** According to the general procedure A. The reaction mixture was stirred at  $130^\circ\text{C}$  for 18h. The product was purified by flash chromatography (1:50 EA/PE) as yellow oil (84 mg, 92%).

$^1\text{H}$  NMR (400 MHz,  $\text{CDCl}_3$ ):  $\delta$  9.47 (s, 1H), 8.56-8.54(m, 2H), 7.92 (dd,  $J = 8.3\text{Hz}$ , 1.6Hz, 1H), 7.32-7.25 (m, 2H), 7.21 (dd,  $J = 8.3\text{Hz}$ , 4.2Hz, 1H), 7.12-7.08 (m, 2H), 7.04-6.98 (m, 3H), 2.64-2.59 (m, 1H), 2.21 (t,  $J = 7.7\text{Hz}$ , 2H), 2.00-1.80 (m, 2H), 1.11 (d,  $J = 7.0\text{Hz}$ , 3H).

$^{13}\text{C}$  NMR (100 MHz,  $\text{CDCl}_3$ ):  $\delta$  171.7, 148.1, 146.4, 138.3, 136.4, 134.5, 128.6, 127.9, 127.5, 127.2, 126.3, 121.6, 121.4, 116.4, 39.6, 36.2, 33.7, 22.6.

HRMS (ESI): Calcd for  $\text{C}_{20}\text{H}_{20}\text{N}_2\text{O}$   $[\text{M}+\text{H}]^+$ : 305.1654, Found: 305.1654.

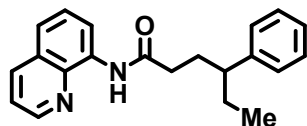

**4-Phenyl-N-(quinolin-8-yl)hexanamide (P84).** According to the general procedure A. The reaction mixture was stirred at  $130^\circ\text{C}$  for 18h. The product was purified by flash chromatography (1:50 EA/PE) as yellow oil (84 mg, 88%).

$^1\text{H}$  NMR (400 MHz,  $\text{CDCl}_3$ ):  $\delta$  9.57 (s, 1H), 8.69-8.68 (m, 2H), 8.06 (d,  $J = 8.3\text{Hz}$ , 1.6Hz, 1H), 7.46-7.33 (m, 3H), 7.25-7.22 (m, 2H), 7.17-7.11 (m, 3H), 2.49-2.14 (m, 4H), 1.97-1.88 (m, 1H), 1.71-1.50 (m, 2H), 0.72 (t,  $J = 7.4\text{Hz}$ , 3H).

$^{13}\text{C}$  NMR (100 MHz,  $\text{CDCl}_3$ ):  $\delta$  171.8, 148.1, 144.6, 138.3, 136.4, 134.6, 128.5, 128.0, 127.9, 127.5, 126.2, 121.6, 121.3, 116.4, 47.4, 36.1, 31.9, 30.0, 12.2.

HRMS (ESI): Calcd for  $\text{C}_{21}\text{H}_{22}\text{N}_2\text{O}$   $[\text{M}+\text{H}]^+$ : 319.1810, Found: 319.1815.

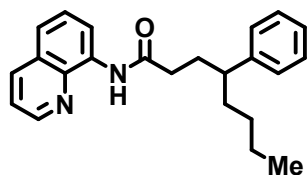

**4-Phenyl-N-(quinolin-8-yl) octanamide (P85).** According to the general procedure A. The reaction mixture was stirred at 130°C for 18h. The product was purified by flash chromatography (1:40 EA/PE) as yellow oil (93 mg, 90%).

$^1\text{H}$  NMR (400 MHz,  $\text{CDCl}_3$ ):  $\delta$  9.65 (s, 1H), 8.77-8.75 (m, 2H), 8.13 (dd,  $J = 8.3\text{Hz}$ , 1.5Hz, 1H), 7.54-7.41 (m, 3H), 7.33-7.19 (m, 5H), 2.65-2.58 (m, 1H), 2.41-2.21 (m, 3H), 2.04-1.95 (m, 1H), 1.75-1.58 (m, 2H), 1.34-1.06 (m, 4H), 0.82 (t,  $J = 7.1\text{Hz}$ , 3H).

$^{13}\text{C}$  NMR (100 MHz,  $\text{CDCl}_3$ ):  $\delta$  171.8, 148.1, 145.0, 138.3, 136.4, 134.6, 128.5, 127.9, 127.8, 127.5, 126.2, 121.6, 121.3, 116.4, 45.6, 36.9, 36.2, 32.3, 29.8, 22.8, 14.0.

HRMS (ESI): Calcd for  $\text{C}_{23}\text{H}_{26}\text{N}_2\text{O}$   $[\text{M}+\text{H}]^+$ : 347.2123, Found: 347.2122.

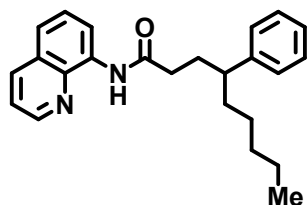

**4-Phenyl-N-(quinolin-8-yl)nonanamide (P86)** . According to the general procedure A. The reaction mixture was stirred at 130°C for 18h. The product was purified by flash chromatography (1:40 EA/PE) as yellow oil (95 mg, 88%).

$^1\text{H}$  NMR (400 MHz,  $\text{CDCl}_3$ ):  $\delta$  9.65 (s, 1H), 8.77-8.76 (m, 2H), 8.14 (dd,  $J = 8.3\text{Hz}$ , 1.6Hz, 1H), 7.54-7.41 (m, 3H), 7.33-7.19 (m, 5H), 2.66-2.56 (m, 1H), 2.39-2.21 (m, 3H), 2.04-1.95 (m, 1H), 1.73-1.57 (m, 2H), 1.34-1.10 (m, 6H), 0.82 (t,  $J = 6.5\text{Hz}$ , 3H).

$^{13}\text{C}$  NMR (100 MHz,  $\text{CDCl}_3$ ):  $\delta$  171.8, 148.1, 145.0, 138.3, 136.4, 134.5, 128.5, 127.9, 127.8, 127.4, 126.2, 121.6, 121.4, 116.4, 45.6, 37.2, 36.2, 32.3, 31.9, 27.3, 22.6, 14.1.

HRMS (ESI): Calcd for  $\text{C}_{24}\text{H}_{28}\text{N}_2\text{O}$   $[\text{M}+\text{H}]^+$ : 361.2280, Found: 361.2287.

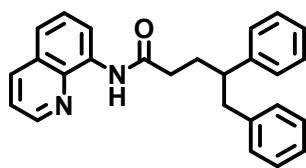

**4,5-Diphenyl-N-(quinolin-8-yl)pentanamide (P87).** According to the general procedure A. The reaction mixture was stirred at 130°C for 18 hours. The product was purified by flash chromatography (1:50 EA/PE) as yellow oil (107 mg, 94%).

$^1\text{H}$  NMR (400 MHz,  $\text{CDCl}_3$ ):  $\delta$  9.61 (s, 1H), 8.74-8.73 (m, 2H), 8.11 (dd,  $J = 8.3\text{Hz}$ , 1.6Hz, 1H), 7.52-7.39 (m, 3H), 7.31-7.02 (m, 10H), 2.98-2.88 (m, 3H), 2.43-2.25 (m, 3H), 2.15-2.05 (m, 1H).

$^{13}\text{C}$  NMR (100 MHz,  $\text{CDCl}_3$ ):  $\delta$  171.5, 148.1, 143.9, 140.2, 138.3, 136.4, 134.5, 129.2, 128.5, 128.1, 127.9, 127.4, 126.5, 125.9, 121.6, 121.4, 116.4, 47.6, 44.1, 36.1, 31.1.

HRMS (ESI): Calcd for  $\text{C}_{26}\text{H}_{24}\text{N}_2\text{O}$   $[\text{M}+\text{H}]^+$ : 381.1967, Found: 381.1960.

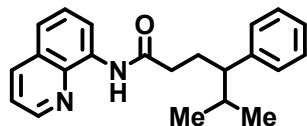

**5-Methyl-4-phenyl-N-(quinolin-8-yl)hexanamide (P88).** According to the general procedure A. The reaction mixture was stirred at 130°C for 18h. The product was purified by flash chromatography (1:40 EA/PE) as yellow oil (75 mg, 75%).

$^1\text{H}$  NMR (400 MHz,  $\text{CDCl}_3$ ):  $\delta$  9.52 (s, 1H), 8.68-8.64 (m, 2H), 8.01 (dd,  $J = 8.2\text{Hz}$ , 1.5Hz, 1H), 7.43-7.29 (m, 3H), 7.22-7.19 (m, 2H), 7.13-7.07 (m, 3H), 2.34-2.13 (m, 4H), 1.98-1.87 (m, 1H), 1.81-1.71 (m, 1H), 0.92 (d,  $J = 6.6\text{Hz}$ , 3H), 0.64 (d,  $J = 6.7\text{Hz}$ , 3H).

$^{13}\text{C}$  NMR (100 MHz,  $\text{CDCl}_3$ ):  $\delta$  171.9, 148.0, 143.6, 138.2, 136.4, 134.5, 128.6, 128.3, 127.9, 127.5, 126.2, 121.6, 121.3, 116.45, 52.6, 36.4, 33.8, 28.7, 21.0, 20.9.

HRMS (ESI): Calcd for  $\text{C}_{22}\text{H}_{24}\text{N}_2\text{O}$   $[\text{M}+\text{H}]^+$ : 333.1967, Found: 333.1965.

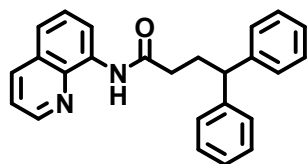

**4,4-Diphenyl-N-(quinolin-8-yl)butanamide (P89).** According to the general procedure A. The reaction mixture was stirred at 130°C for 18h. The product was purified by flash chromatography (1:50 EA/PE) as yellow oil (100 mg, 91%).

$^1\text{H}$  NMR (400 MHz,  $\text{CDCl}_3$ ):  $\delta$  9.69 (s, 1H), 8.78-8.76 (m, 2H), 8.13 (dd,  $J = 8.3\text{Hz}$ , 1.4Hz, 1H), 7.55-7.41 (m, 3H), 7.36-7.16 (m, 10H), 4.06 (t,  $J = 7.5\text{Hz}$ , 1H), 2.61-2.50 (m, 4H).

$^{13}\text{C}$  NMR (100 MHz,  $\text{CDCl}_3$ ):  $\delta$  171.3, 148.1, 144.3, 138.3, 136.4, 134.5, 128.6, 128.0, 127.5, 126.4, 121.6, 121.4, 116.5, 50.6, 36.3, 31.0.

HRMS (ESI): Calcd for  $\text{C}_{25}\text{H}_{22}\text{N}_2\text{O}$   $[\text{M}+\text{H}]^+$ : 367.1810, Found: 367.1808.

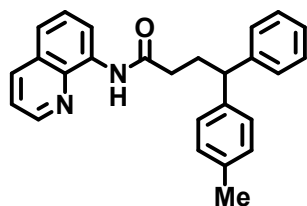

**4-Phenyl-N-(quinolin-8-yl)-4-(p-tolyl)butanamide (P90).** According to the general procedure A. The reaction mixture was stirred at 130°C for 18h. The product was purified by flash chromatography (1:20 EA/PE) as yellow oil (96 mg, 84%).

$^1\text{H}$  NMR (400 MHz,  $\text{CDCl}_3$ )  $\delta$  9.69 (s, 1H), 8.78-8.76 (m, 2H), 8.14 (dd,  $J = 8.2\text{Hz}$ , 1.7Hz, 1H), 7.55-7.42 (m, 3H), 7.29-7.08 (m, 9H), 4.01 (t,  $J = 7.4\text{Hz}$ , 1H), 2.60-2.49 (m, 4H), 2.29 (s, 3H).

$^{13}\text{C}$  NMR (100 MHz,  $\text{CDCl}_3$ )  $\delta$  171.4, 148.1, 144.6, 141.3, 138.3, 136.4, 135.9, 134.5, 129.3, 128.6, 128.0, 127.9, 127.8, 127.5, 126.3, 121.6, 121.4, 116.5, 50.2, 36.4, 31.1, 21.0.

HRMS (ESI): Calcd for  $\text{C}_{26}\text{H}_{24}\text{N}_2\text{O}$   $[\text{M}+\text{H}]^+$ : 381.1967, Found: 381.1967.



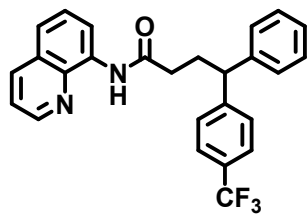

**4-Phenyl-N-(quinolin-8-yl)-4-(4-(trifluoromethyl)phenyl)butanamide (P91).**

According to the general procedure A. The reaction mixture was stirred at 130°C for 18h. The product was purified by flash chromatography (1:20 EA/PE) as yellow oil (119 mg, 91%).

$^1\text{H}$  NMR (400 MHz,  $\text{CDCl}_3$ )  $\delta$  9.69 (s, 1H), 8.78-8.75 (m, 2H), 8.14 (dd,  $J = 8.3\text{Hz}$ , 1H), 7.55-7.48 (m, 4H), 7.45-7.40 (m, 3H), 7.33-7.19 (m, 5H), 4.13 (t,  $J = 7.6\text{Hz}$ , 1H), 2.62-2.50 (m, 4H).

$^{13}\text{C}$  NMR (100 MHz,  $\text{CDCl}_3$ )  $\delta$  171.0, 148.5, 148.1, 143.2, 138.3, 136.4, 134.4, 128.8, 128.3, 128.0 (d,  $J = 1.9\text{Hz}$ ), 127.4, 126.8, 125.6 (q,  $J = 3.4\text{Hz}$ ), 121.6 (d,  $J = 9.8\text{Hz}$ ), 116.5, 50.3, 36.0, 30.8.

$^{19}\text{F}$  NMR (376 MHz,  $\text{CDCl}_3$ )  $\delta$  - 62.31.

HRMS (ESI): Calcd for  $\text{C}_{26}\text{H}_{21}\text{F}_3\text{N}_2\text{O}$   $[\text{M}+\text{H}]^+$ : 435.1684, Found: 435.1682.

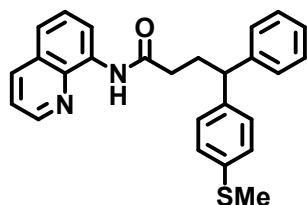

**4-(4-(Methylthio)phenyl)-4-phenyl-N-(quinolin-8-yl)butanamide (P92).** According to the general procedure A. The reaction mixture was stirred at 130 °C for 18h. The product was purified by flash chromatography (1:20 EA/PE) as yellow oil (101 mg, 82%).

$^1\text{H}$  NMR (400 MHz,  $\text{CDCl}_3$ )  $\delta$  9.69 (s, 1H), 8.77-8.76 (m, 2H), 8.14 (d,  $J = 8.3$ , 1H), 7.55-7.42 (m, 3H), 7.31-7.17 (m, 9H), 4.01 (t,  $J = 7.4\text{ Hz}$ , 1H), 2.56-2.46 (m, 4H), 2.44 (s, 3H).

$^{13}\text{C}$  NMR (100 MHz,  $\text{CDCl}_3$ )  $\delta$  171.3, 148.1, 144.2, 141.3, 138.3, 136.4, 136.1, 134.5, 128.6, 128.5, 128.0, 127.9, 127.5, 127.1, 126.4, 121.6, 121.5, 116.5, 50.0, 36.3, 31.0, 16.1.

HRMS (ESI): Calcd for  $\text{C}_{26}\text{H}_{24}\text{N}_2\text{OS}$   $[\text{M}+\text{H}]^+$ : 413.1688, Found: 413.1685.

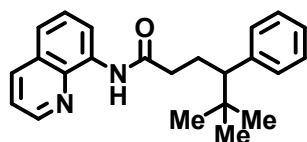

**5,5-Dimethyl-4-phenyl-N-(quinolin-8-yl)hexanamide (P93).** According to the general procedure A. The reaction mixture was stirred at  $130^\circ\text{C}$  for 18h. The product was purified by flash chromatography (1:20 EA/PE) as yellow oil (84 mg, 81%).

$^1\text{H}$  NMR (400 MHz,  $\text{CDCl}_3$ )  $\delta$  9.58 (s, 1H), 8.77-8.74 (m, 2H), 8.15-8.13 (m, 1H), 7.45-7.42 (m, 3H), 7.31-7.20 (m, 5H), 2.46-2.11 (m, 5H), 0.92 (s, 9H).

$^{13}\text{C}$  NMR (100 MHz,  $\text{CDCl}_3$ )  $\delta$  172.0, 148.0, 142.1, 138.3, 136.3, 134.6, 127.9, 127.4, 126.3, 121.6, 121.3, 116.4, 56.2, 36.9, 34.0, 29.5, 29.4, 28.3, 25.2.

HRMS (ESI): Calcd for  $\text{C}_{23}\text{H}_{26}\text{N}_2\text{O}$   $[\text{M}+\text{H}]^+$ : 347.2123, Found: 347.2122.

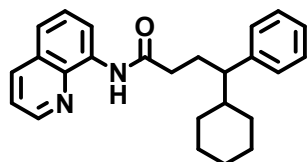

**4-Cyclohexyl-4-phenyl-N-(quinolin-8-yl)butanamide (P94).** According to the general procedure A. The title compound was prepared from alkene S14 (Z/E = 1.6:1). The reaction mixture was stirred at  $130^\circ\text{C}$  for 18h. The product was purified by flash chromatography (1:20 EA/PE) as yellow solid (101 mg, 90%). Mp:  $95.2\text{--}97.0^\circ\text{C}$ .

$^1\text{H}$  NMR (400 MHz,  $\text{CDCl}_3$ )  $\delta$  9.60 (s, 1H), 8.77-8.75 (m, 2H), 8.14 (dd,  $J = 8.2\text{ Hz}$ ,  $1.7\text{ Hz}$ , 1H), 7.54-7.41 (m, 3H), 7.32-7.16 (m, 5H), 2.43-2.25 (m, 4H), 2.01-1.97 (m, 2H), 1.76-1.41 (m, 4H), 1.25-1.22 (m, 2H), 1.13-0.96 (m, 3H), 0.83-0.79 (m, 1H).

$^{13}\text{C}$  NMR (100 MHz,  $\text{CDCl}_3$ )  $\delta$  171.9, 148.0, 143.7, 138.3, 136.3, 134.6, 128.6, 128.3, 127.9, 127.5, 126.1, 121.6, 121.3, 116.4, 51.7, 43.4, 36.4, 31.3, 31.2, 28.3, 26.6, 26.5.

HRMS (ESI): Calcd for  $\text{C}_{25}\text{H}_{28}\text{N}_2\text{O}$   $[\text{M}+\text{H}]^+$ : 373.2280, Found: 373.2286.

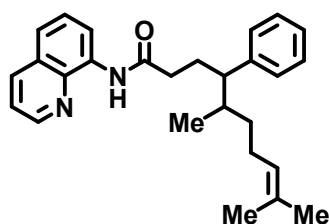

**5,9-Dimethyl-4-phenyl-N-(quinolin-8-yl)dec-8-enamide (P95).** According to the general procedure A. The reaction mixture was stirred at 130°C for 18h. The product was purified by flash chromatography (1:20 EA/PE) as yellow oil (90 mg, 75%).

$^1\text{H}$  NMR (400 MHz,  $\text{CDCl}_3$ )  $\delta$  9.54 (s, 1H), 8.69-8.68 (m, 2H), 8.06 (dd,  $J = 8.3\text{Hz}$ , 1.7Hz, 1H), 7.47-7.34 (m, 3H), 7.25-7.10 (m, 5H), 5.03-4.88 (m, 1H), 2.49-2.41 (m, 1H), 2.32-2.17 (m, 3H), 2.04-1.76 (m, 3H), 1.68-1.64 (m, 1H), 1.60-1.45 (m, 6H), 1.28-1.24 (m, 1H), 1.06-1.03 (m, 1H), 0.91 (d,  $J = 6.7\text{Hz}$ , 2H), 0.69 (d,  $J = 6.8\text{Hz}$ , 1H).

$^{13}\text{C}$  NMR (100 MHz,  $\text{CDCl}_3$ )  $\delta$  171.9, 171.8, 148.0, 143.7, 143.0, 138.3, 136.3, 134.5, 131.3, 131.2, 128.9, 128.6, 128.3, 128.2, 127.9, 127.4, 126.2, 126.1, 124.7, 121.6, 121.3, 116.4, 51.0, 50.7, 38.3, 38.1, 36.5, 36.4, 34.8, 34.4, 28.8, 27.7, 25.8, 25.7, 25.6, 25.5, 17.7, 17.6, 17.0, 16.8.

HRMS (ESI): Calcd for  $\text{C}_{27}\text{H}_{32}\text{N}_2\text{O}$   $[\text{M}+\text{H}]^+$ : 401.2593, Found: 401.2596.

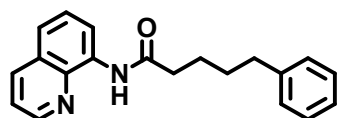

**N-(Naphthalen-1-yl)-5-phenylpentanamide (P96).** According to the general procedure B. The reaction mixture was stirred at 130°C for 18h. The product was purified by flash chromatography (1:50 EA/PE) as yellow solid (78 mg, 85%). Without addition of  $\text{NCCH}_2\text{COOH}$ , the product was only afforded in 12% yield. Mp: 53.6-55.0 °C.

$^1\text{H}$  NMR (400 MHz,  $\text{CDCl}_3$ ):  $\delta$  9.80 (s, 1H), 8.79-8.77 (m, 2H), 8.13 (dd,  $J = 8.3\text{Hz}$ , 1.6Hz, 1H), 7.54-7.41 (m, 3H), 7.28- 7.15 (m, 5H), 2.69 (t,  $J = 7.6\text{Hz}$ , 2H), 2.57 (t,  $J = 7.4\text{Hz}$ , 2H), 1.91-1.83 (m, 2H). 1.81-1.72 (m, 2H).

$^{13}\text{C}$  NMR (100 MHz,  $\text{CDCl}_3$ ):  $\delta$  171.7, 148.1, 142.2, 138.3, 136.4, 134.5, 128.5, 128.4, 128.0, 127.5, 125.8, 121.6, 121.4, 116.4, 38.1, 35.8, 31.1, 25.4.

HRMS (ESI): Calcd for  $\text{C}_{20}\text{H}_{20}\text{N}_2\text{O}$   $[\text{M}+\text{H}]^+$ : 305.1654, Found: 305.1656.

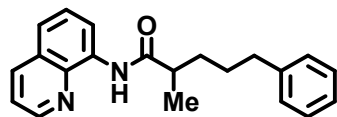

**2-Methyl-N-(naphthalen-1-yl)-5-phenylpentanamide (P97).** According to the general procedure B. The reaction mixture was stirred at  $130^\circ\text{C}$  for 18h. The product was purified by flash chromatography (1:50 EA/PE) as yellow oil (76 mg, 80%). Without addition of  $\text{NCCH}_2\text{COOH}$ , the product was only afforded in 56% yield.

$^1\text{H}$  NMR (400 MHz,  $\text{CDCl}_3$ ):  $\delta$  9.86 (s, 1H), 8.82-8.80 (m, 2H), 8.17-8.14 (m, 1H), 7.56-7.43 (m, 3H), 7.26-7.13 (m, 5H), 2.68-2.59 (m, 3H), 1.95-1.86 (m, 1H), 1.78-1.56 (m, 3H), 1.32 (d,  $J = 6.6\text{Hz}$ , 3H).

$^{13}\text{C}$  NMR (100 MHz,  $\text{CDCl}_3$ ):  $\delta$  175.3, 148.2, 142.2, 138.5, 136.4, 134.5, 128.4, 128.3, 128.0, 127.5, 125.7, 121.6, 121.4, 116.5, 43.0, 36.0, 34.1, 29.4, 18.1.

HRMS (ESI): Calcd for  $\text{C}_{21}\text{H}_{22}\text{N}_2\text{O}$   $[\text{M}+\text{H}]^+$ : 319.1810, Found: 319.1812.

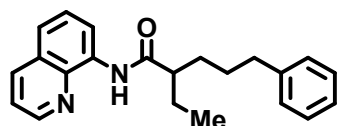

**2-Ethyl-N-(naphthalen-1-yl)-5-phenylpentanamide (P98).** According to the general procedure B. The title compound was prepared by using 5 equiv NaH instead of  $\text{Cs}_2\text{CO}_3$  and without  $\text{H}_2\text{O}$ . The reaction mixture was stirred at  $130^\circ\text{C}$  for 18h. The product was purified by flash chromatography (1:50 EA/PE) as yellow oil (58 mg, 58%).

$^1\text{H}$  NMR (400 MHz,  $\text{CDCl}_3$ )  $\delta$  9.85 (s, 1H), 8.85-8.79 (m, 2H), 8.14 (dd,  $J = 8.3\text{Hz}$ , 1.7Hz, 1H), 7.55-7.42 (m, 3H), 7.25-7.11 (m, 5H), 2.65 (t,  $J = 7.6\text{Hz}$ , 2H), 2.44-2.37 (m, 1H), 1.89-1.60 (m, 6H), 0.99 (t,  $J = 7.4\text{Hz}$ , 3H).

$^{13}\text{C}$  NMR (100 MHz,  $\text{CDCl}_3$ ):  $\delta$  174.7, 148.2, 142.3, 138.4, 136.4, 134.5, 128.4, 128.3, 128.0, 127.5, 125.7, 121.6, 121.4, 116.5, 50.9, 36.0, 32.6, 29.5, 26.3, 12.2.

HRMS (ESI): Calcd for C<sub>22</sub>H<sub>24</sub>N<sub>2</sub>O [M+H]<sup>+</sup>: 333.1967, Found: 333.1969.

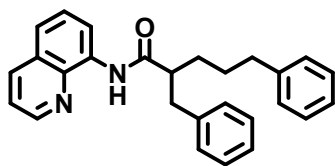

**2-Benzyl-N-(naphthalen-1-yl)-5-phenylpentanamide (P99).** According to the general procedure B. The reaction mixture was stirred at 130°C for 18h. The product was purified by flash chromatography (1:50 EA/PE) as yellow oil (80 mg, 68%).

<sup>1</sup>H NMR (400 MHz, CDCl<sub>3</sub>): δ 9.67 (s, 1H), 8.79-8.71 (m, 2H), 8.10 (dd, *J* = 8.2Hz, 1.6Hz, 1H), 7.53-7.38 (m, 3H), 7.28-7.11 (m, 10H), 3.16-3.11 (m, 1H), 2.88-2.72 (m, 2H), 2.63 (t, *J* = 7.5Hz, 2H), 1.98-1.88 (m, 1H), 1.84-1.63 (m, 3H).

<sup>13</sup>C NMR (100 MHz, CDCl<sub>3</sub>): δ 173.8, 148.1, 142.1, 139.6, 138.4, 136.3, 134.3, 129.0, 128.4, 128.3, 127.9, 127.4, 126.3, 125.8, 121.6, 121.5, 116.5, 51.2, 39.3, 36.0, 32.4, 29.4.

HRMS (ESI): Calcd for C<sub>27</sub>H<sub>26</sub>N<sub>2</sub>O [M+H]<sup>+</sup>: 395.2123, Found: 395.2131.

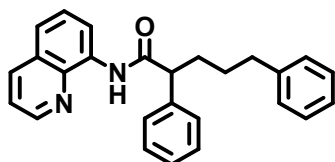

**2,5-Diphenyl-N-(quinolin-8-yl)pentanamide (P100).** According to the general procedure B. The title compound was prepared by using 5 equiv NaH instead of Cs<sub>2</sub>CO<sub>3</sub> and without H<sub>2</sub>O. The reaction mixture was stirred at 130°C for 18h. The product was purified by flash chromatography (1:50 EA/PE) as yellow oil (78 mg, 68%)

<sup>1</sup>H NMR (400 MHz, CDCl<sub>3</sub>): δ 9.89 (s, 1H), 8.77-8.69 (m, 2H), 8.07 (dd, *J* = 8.2Hz, 1.6Hz, 1H), 7.49-7.41 (m, 4H), 7.38-7.33 (m, 3H), 7.29-7.21 (m, 3H), 7.15-7.12 (m, 3H), 3.71 (t, *J* = 7.6Hz, 1H), 2.74-2.60 (m, 2H), 2.40-2.31 (m, 1H), 2.03-1.94 (m, 1H), 1.80-1.58 (m, 2H).

$^{13}\text{C}$  NMR (100 MHz,  $\text{CDCl}_3$ ):  $\delta$  172.1, 148.2, 142.2, 139.8, 138.4, 136.3, 134.5, 128.9, 128.5, 128.3, 128.1, 127.9, 127.4, 127.3, 125.8, 121.6, 121.5, 116.4, 54.9, 35.9, 33.1, 29.7.

HRMS (ESI): Calcd for  $\text{C}_{26}\text{H}_{24}\text{N}_2\text{O}$   $[\text{M}+\text{H}]^+$ : 381.1967, Found: 381.1969.

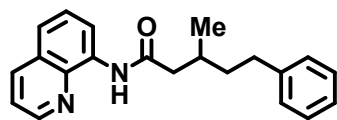

**3-Methyl-N-(naphthalen-1-yl)-5-phenylpentanamide (P101).** According to the general procedure B. The title compound was prepared by using 5 equiv NaH instead of  $\text{Cs}_2\text{CO}_3$  and without  $\text{H}_2\text{O}$ . The reaction mixture was stirred at  $130^\circ\text{C}$  for 18h. The product was purified by flash chromatography (1:50 EA/PE) as yellow oil (84 mg, 88%).

$^1\text{H}$  NMR (400 MHz,  $\text{CDCl}_3$ ):  $\delta$  9.80 (s, 1H), 8.81-8.78 (m, 2H), 8.15 (dd,  $J = 8.3\text{Hz}$ , 1.6Hz, 1H), 7.55-7.43 (m, 3H), 7.28-7.14 (m, 5H), 2.78-2.59 (m, 3H), 2.43-2.37 (m, 1H), 2.29-2.20 (m, 1H), 1.85-1.76 (m, 1H), 1.66-1.56 (m, 1H), 1.12 (d,  $J = 6.6\text{Hz}$ , 3H).

$^{13}\text{C}$  NMR (100 MHz,  $\text{CDCl}_3$ ):  $\delta$  171.2, 148.2, 142.5, 138.3, 136.4, 134.5, 128.4, 128.3, 128.0, 127.5, 125.7, 121.6, 121.4, 116.4, 45.9, 38.8, 33.5, 30.8, 19.8.

HRMS (ESI): Calcd for  $\text{C}_{21}\text{H}_{22}\text{N}_2\text{O}$   $[\text{M}+\text{H}]^+$ : 319.1810, Found: 319.1812.

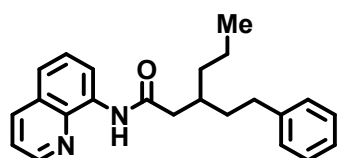

**N-(Naphthalen-1-yl)-3-phenethylhexanamide (P102).** According to the general procedure B. The reaction mixture was stirred at  $130^\circ\text{C}$  for 18h. The product was purified by flash chromatography (1:50 EA/PE) as yellow oil (52 mg, 50 %).

$^1\text{H}$  NMR (400 MHz,  $\text{CDCl}_3$ ):  $\delta$  9.82 (s, 1H), 8.81-8.79 (m, 2H), 8.16 (dd,  $J = 8.0\text{Hz}$ , 1.6Hz, 1H), 7.54-7.44 (m, 3H), 7.26-7.14 (m, 5H), 2.72-2.68 (m, 2H), 2.57-2.56 (m, 2H), 2.21-2.15 (m, 1H), 1.78-1.73 (m, 2H), 1.47-1.42 (m, 4H), 0.92 (t,  $J = 6.9\text{Hz}$ , 3H).

$^{13}\text{C}$  NMR (100 MHz,  $\text{CDCl}_3$ ):  $\delta$  171.3, 148.1, 142.6, 138.3, 136.3, 134.5, 128.4, 128.3, 127.9, 127.4, 125.6, 121.6, 121.3, 116.4, 43.1, 36.1, 35.9, 35.2, 33.1, 19.7, 14.3.

HRMS (ESI): Calcd for  $\text{C}_{23}\text{H}_{26}\text{N}_2\text{O}$   $[\text{M}+\text{H}]^+$ : 347.2123, Found: 347.2128.

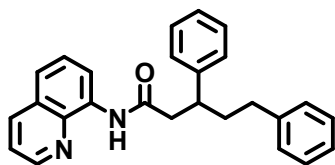

***N*-(Naphthalen-1-yl)-3,5-diphenylpentanamide (P103).** According to the general procedure B. The reaction mixture was stirred at 130°C for 18h. The product was purified by flash chromatography (1:50 EA/PE) as yellow oil (74 mg, 65 %).

$^1\text{H}$  NMR (400 MHz,  $\text{CDCl}_3$ ):  $\delta$  9.65(s, 1H), 8.72-8.70 (m, 2H), 8.08 (dd,  $J$  = 8.2Hz, 1.2Hz, 1H), 7.49-7.37 (m, 3H), 7.32-7.29 (m, 4H), 7.23-7.09 (m, 6H), 3.38-3.35 (m, 1H), 2.86 (d,  $J$  = 7.4Hz, 2H), 2.53-2.48 (m, 2H), 2.17-2.14 (m, 1H), 2.03-2.00 (m, 1H).

$^{13}\text{C}$  NMR (100 MHz,  $\text{CDCl}_3$ ):  $\delta$  170.2, 148.1, 143.8, 142.1, 138.3, 136.3, 134.4, 128.7, 128.6, 128.4, 128.3, 127.9, 127.7, 127.4, 126.7, 125.8, 121.6, 121.5, 116.5, 45.9, 42.4, 38.0, 33.8.

HRMS (ESI): Calcd for  $\text{C}_{26}\text{H}_{24}\text{N}_2\text{O}$   $[\text{M}+\text{H}]^+$ : 381.1967, Found: 381.1962.

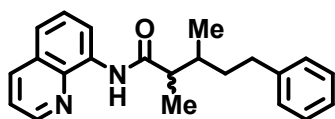

**2,3-Dimethyl-*N*-(naphthalen-1-yl)-5-phenylpentanamide (P104).** According to the general procedure B. The title compound was prepared from alkene S27 ( $dr$  = 1.2:1). The reaction mixture was stirred at 130°C for 18h. The product was purified by flash chromatography (1:50 EA/PE) as yellow oil (78 mg, 78%). The  $dr$  value is 1.4:1 analysis by GCMS. Without addition of  $\text{NCCH}_2\text{COOH}$ , the product was only afforded in 71% yield.

$^1\text{H}$  NMR (400 MHz,  $\text{CDCl}_3$ ):  $\delta$  9.86 (s, 1H), 8.82-8.78 (m, 2H), 8.18-8.15 (m, 1H), 7.53-7.42 (m, 3H), 7.25-7.12 (m, 5H), 2.80-2.71 (m, 1H), 2.65-2.47 (m, 2H), 2.07-1.75 (m, 2H), 1.62-1.52 (m, 1H), 1.33-1.28 (m, 3H), 1.12-1.05 (m, 3H).

$^{13}\text{C}$  NMR (100 MHz,  $\text{CDCl}_3$ ):  $\delta$  174.9, 174.8, 148.2, 142.5, 142.4, 138.5, 136.5, 134.6, 134.5, 128.3, 128.0, 127.5, 125.8, 125.7, 121.6, 121.4, 121.3, 116.5, 116.4, 48.2, 47.8, 36.9, 36.4, 36.0, 35.4, 33.7, 33.3, 17.5, 16.0, 15.0, 13.7.

HRMS (ESI): Calcd for  $\text{C}_{22}\text{H}_{24}\text{N}_2\text{O}$   $[\text{M}+\text{H}]^+$ : 333.1967, Found: 333.1969.

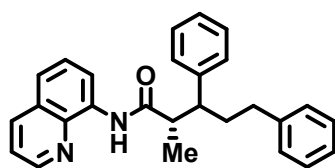

***anti*-2-Methyl-3,5-diphenyl-*N*-(quinolin-8-yl)pentanamide (P105).** According to the general procedure B. The title compound was prepared from *anti*-alkene S28. The reaction mixture was stirred at 130°C for 18h. The product was purified by flash chromatography (1:50 EA/PE) as yellow oil (96 mg, 81%).

$^1\text{H}$  NMR (400 MHz,  $\text{CDCl}_3$ ):  $\delta$  9.52 (s, 1H), 8.72 (dd,  $J = 4.2\text{Hz}$ ,  $1.7\text{Hz}$ , 1H), 8.61 (dd,  $J = 7.1\text{Hz}$ ,  $2.3\text{Hz}$ , 1H), 8.10 (dd,  $J = 8.5\text{Hz}$ ,  $1.7\text{Hz}$ , 1H), 7.44-7.39 (m, 3H), 7.30-7.29 (m, 2H), 7.16-7.03 (m, 8H), 3.06-3.02 (m, 1H), 2.86-2.82 (m, 1H), 2.46-2.39 (m, 2H), 2.29-2.21 (m, 1H), 2.06-1.96 (m, 1H), 1.40 (d,  $J = 6.8\text{Hz}$ , 3H).

$^{13}\text{C}$  NMR (100 MHz,  $\text{CDCl}_3$ ):  $\delta$  174.0, 148.0, 142.8, 142.4, 136.4, 134.4, 128.5, 128.4(6), 128.4, 128.3, 127.9, 127.4, 126.6, 125.8, 121.5, 121.3, 49.6, 48.9, 33.8, 33.7, 15.7.

HRMS (ESI): Calcd for  $\text{C}_{27}\text{H}_{26}\text{N}_2\text{O}$   $[\text{M}+\text{H}]^+$ : 395.2123, Found: 395.2122.

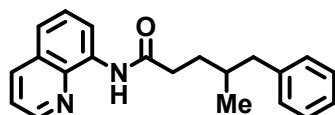

**4-Methyl-5-phenyl-*N*-(quinolin-8-yl)pentanamide (P106).** According to the general procedure B. The title compound was prepared by using NaO<sup>t</sup>Bu (5 equiv) and  $\text{H}_2\text{O}$  (50 equiv). The reaction mixture was stirred at 130°C for 18h. The product was



purified by flash chromatography (1:20 EA/PE) as yellow oil (73 mg, 76%).

$^1\text{H}$  NMR (401 MHz,  $\text{CDCl}_3$ )  $\delta$  9.80 (s, 1H), 8.81-8.77 (m, 2H), 8.17 (d,  $J = 8.6\text{Hz}$ , 1H), 7.56-7.44 (m, 3H), 7.28 (d,  $J = 8.1\text{Hz}$ , 2H), 7.18 (d,  $J = 7.7\text{Hz}$ , 3H), 2.77-2.43 (m, 4H), 1.97-1.82 (m, 2H), 1.75-1.67 (m, 1H), 0.95 (d,  $J = 8.2\text{Hz}$ , 3H).

$^{13}\text{C}$  NMR (100 MHz,  $\text{CDCl}_3$ )  $\delta$  172.0, 148.2, 141.1, 138.4, 136.5, 134.7, 129.3, 128.3, 128.1, 127.6, 125.9, 121.7, 121.5, 116.5, 43.6, 36.2, 34.9, 32.5, 19.3.

HRMS (ESI): Calcd for  $\text{C}_{21}\text{H}_{22}\text{N}_2\text{O}$   $[\text{M}+\text{H}]^+$ : 319.1810, Found: 319.1811.

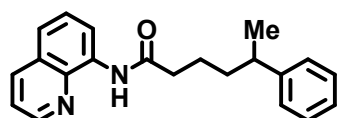

**5-Phenyl-*N*-(quinolin-8-yl)hexanamide (P107).** According to the general procedure B. The title compound was prepared from PhBr (3 equiv). The reaction mixture was stirred at  $130^\circ\text{C}$  for 18h. The product was purified by flash chromatography (1:50 EA/PE) as yellow oil (76 mg, 80%). Without addition of  $\text{NCCH}_2\text{COOH}$ , the product was only afforded in 23% yield.

$^1\text{H}$  NMR (400 MHz,  $\text{CDCl}_3$ )  $\delta$  9.76 (s, 1H), 8.79-8.76 (m, 2H), 8.14 (dd,  $J = 8.2\text{Hz}$ , 1.7Hz, 1H), 7.54-7.42 (m, 3H), 7.30-7.25 (m, 2H), 7.21-7.15 (m, 3H), 2.76 (q,  $J = 6.9\text{Hz}$ , 1H), 2.51 (t,  $J = 7.1\text{Hz}$ , 2H), 1.83-1.65 (m, 4H), 1.27 (d,  $J = 7.0\text{Hz}$ , 3H).

$^{13}\text{C}$  NMR (100 MHz,  $\text{CDCl}_3$ )  $\delta$  171.7, 148.1, 147.3, 138.3, 136.4, 134.5, 128.4, 127.9, 127.5, 127.0, 126.0, 121.6, 121.4, 116.4, 39.9, 38.2, 37.9, 23.9, 22.3.

HRMS (ESI): Calcd for  $\text{C}_{21}\text{H}_{22}\text{N}_2\text{O}$   $[\text{M}+\text{H}]^+$ : 319.1810, Found: 319.1812.

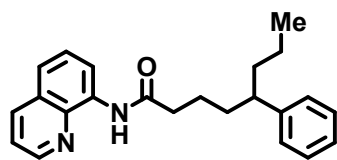

**5-Phenyl-*N*-(quinolin-8-yl)octanamide (P108).** According to the general procedure B. The title compound was prepared from PhBr (3 equiv). The reaction mixture was stirred at  $130^\circ\text{C}$  for 18h. The product was purified by flash chromatography (1:20 EA/PE) as yellow oil (91 mg, 88%).

$^1\text{H}$  NMR (400 MHz,  $\text{CDCl}_3$ )  $\delta$  9.67 (s, 1H), 8.69-8.68 (m, 2H), 8.05 (dd,  $J = 8.3\text{Hz}$ , 1.7Hz, 1H), 7.43-7.37 (m, 2H), 7.36-7.33 (m, 1H), 7.20-7.16 (m, 2H), 7.09-7.06 (m, 3H), 2.42-2.39 (m, 3H), 1.66-1.48 (m, 6H), 1.09-1.07 (m, 2H), 0.74 (t,  $J = 7.3\text{Hz}$ , 3H).

$^{13}\text{C}$  NMR (100 MHz,  $\text{CDCl}_3$ )  $\delta$  171.8, 148.0, 145.7, 138.2, 136.6, 134.5, 128.3, 128.0, 127.7, 127.5, 126.0, 121.6, 121.4, 116.6, 45.7, 39.1, 38.2, 36.5, 23.9, 20.7, 14.2.

HRMS (ESI): Calcd for  $\text{C}_{23}\text{H}_{26}\text{N}_2\text{O}$   $[\text{M}+\text{H}]^+$ : 347.2123, Found: 347.2128.

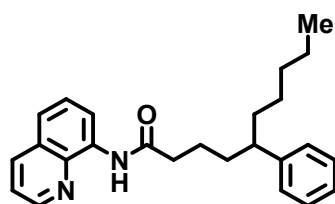

**5-Phenyl-N-(quinolin-8-yl)decanamide (P109).** According to the general procedure B. The title compound was prepared from PhBr (3 equiv). The reaction mixture was stirred at  $130^\circ\text{C}$  for 18h. The product was purified by flash chromatography (1:20 EA/PE) as yellow oil (103 mg, 92%).

$^1\text{H}$  NMR (400 MHz,  $\text{CDCl}_3$ )  $\delta$  9.74 (s, 1H), 8.77-8.75 (m, 2H), 8.11 (d,  $J = 1.7\text{Hz}$ , 1H), 7.53-7.40 (m, 3H), 7.29-7.15 (m, 5H), 2.55-2.46 (m, 3H), 1.78-1.58 (m, 6H), 1.20-1.14 (m, 6H), 0.83-0.79 (m, 3H).

$^{13}\text{C}$  NMR (100 MHz,  $\text{CDCl}_3$ )  $\delta$  171.7, 148.1, 145.7, 138.3, 136.4, 134.5, 128.3, 127.9, 127.7, 127.5, 126.0, 121.6, 121.4, 116.4, 46.0, 38.3, 36.8, 36.5, 32.0, 27.3, 23.9, 22.6, 14.1.

HRMS (ESI): Calcd for  $\text{C}_{25}\text{H}_{30}\text{N}_2\text{O}$   $[\text{M}+\text{H}]^+$ : 375.2436, Found: 375.2429.

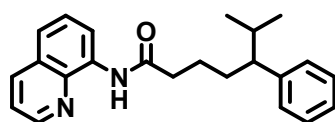

**6-Methyl-5-phenyl-N-(quinolin-8-yl)heptanamide (P110).** According to the general procedure B. The title compound was prepared from PhBr (3 equiv). The reaction mixture was stirred at  $130^\circ\text{C}$  for 18h. The product was purified by flash chromatography (1:20 EA/PE) as yellow oil (60 mg, 58%).

$^1\text{H}$  NMR (400 MHz,  $\text{CDCl}_3$ )  $\delta$  9.72(s, 1H), 8.78-8.73 (m, 2H), 8.15-8.13 (m, 1H), 7.53-7.42 (m, 3H), 7.27-7.23 (m, 2H), 7.18-7.12 (m, 3H), 2.50-2.45 (m, 2H), 2.32-2.31 (m, 1H), 1.89 -1.57 (m, 5H), 0.94 (d,  $J=4.0\text{Hz}$ , 3H), 0.71 (d,  $J=4.0\text{Hz}$ , 3H).

$^{13}\text{C}$  NMR (100 MHz,  $\text{CDCl}_3$ )  $\delta$  171.8, 148.1, 144.2, 138.4, 136.4, 134.6, 128.9, 128.6, 128.1, 128.0, 127.5, 126.0, 121.6, 121.4, 116.5, 53.1, 38.4, 33.5, 32.6, 24.2, 21.1, 20.8.

HRMS (ESI): Calcd for  $\text{C}_{23}\text{H}_{26}\text{N}_2\text{O}$   $[\text{M}+\text{H}]^+$ : 347.2123, Found: 347.2122.

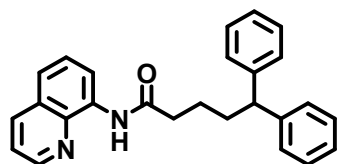

**5,5-Diphenyl-N-(quinolin-8-yl)pentanamide (P111).** According to the general procedure B. The title compound was prepared from PhBr (3 equiv). The reaction mixture was stirred at  $130^\circ\text{C}$  for 18h. The product was purified by flash chromatography (1:20 EA/PE) as yellow oil (78 mg, 68%). Without addition of  $\text{NCCH}_2\text{COOH}$ , the product was only afforded in 28% yield.

$^1\text{H}$  NMR (400 MHz,  $\text{CDCl}_3$ )  $\delta$  9.63 (s, 1H), 8.65-8.61 (m, 2H), 8.01-8.00 (m, 1H), 7.40-7.28 (m, 3H), 7.13-7.11 (m, 8H), 7.04-7.00 (m, 2H), 3.83 (t,  $J=7.8\text{Hz}$ , 1H), 2.44 (t,  $J=7.4\text{Hz}$ , 2H), 2.08-2.02 (m, 2H), 1.70-1.62 (m, 2H).

$^{13}\text{C}$  NMR (100 MHz,  $\text{CDCl}_3$ )  $\delta$  171.5, 148.1, 144.8, 138.3, 136.4, 134.5, 128.5, 128.0, 127.9, 127.5, 126.2, 121.6, 121.4, 116.5, 51.3, 38.1, 35.2, 24.3.

HRMS (ESI): Calcd for  $\text{C}_{26}\text{H}_{24}\text{N}_2\text{O}$   $[\text{M}+\text{H}]^+$ : 381.1967, Found: 381.1963.

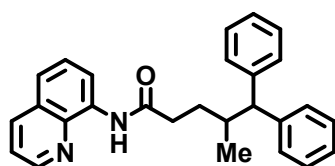

**4-Methyl-5,5-diphenyl-N-(quinolin-8-yl)pentanamide (P112).** According to the

general procedure B. The title compound was prepared from PhBr (3 equiv) and  $\text{Na}_2\text{CO}_3$  (5 equiv). The reaction mixture was stirred at 130°C for 18h. The product was purified by flash chromatography (1:20 EA/PE) as yellow oil (103 mg, 87%).

$^1\text{H}$  NMR (400 MHz,  $\text{CDCl}_3$ )  $\delta$  9.71 (s, 1H), 8.79-8.74 (m, 2H), 8.16-8.14 (m, 1H), 7.54-7.43 (m, 3H), 7.33-7.08 (m, 10H), 3.58 (d,  $J = 10.8$  Hz, 1H), 2.63-2.48 (m, 3H), 2.07-1.99 (m, 1H), 1.55-1.52 (m, 1H), 0.94 (d,  $J = 6.5$  Hz, 3H).

$^{13}\text{C}$  NMR (100 MHz,  $\text{CDCl}_3$ )  $\delta$  171.7, 148.1, 144.5, 144.1, 138.3, 136.4, 134.5, 128.6, 128.5, 128.1, 128.0, 127.9, 127.5, 126.2, 126.1, 121.6, 121.3, 116.4, 59.4, 36.0, 35.8, 30.9, 18.2.

HRMS (ESI): Calcd for  $\text{C}_{27}\text{H}_{26}\text{N}_2\text{O}$   $[\text{M}+\text{H}]^+$ : 395.2123, Found: 395.2122.

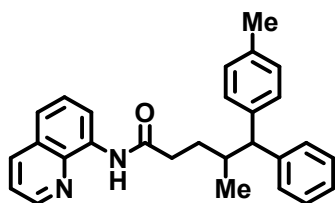

**4-Methyl-5-phenyl-N-(quinolin-8-yl)-5-(*p*-tolyl)pentanamide (P113).** According to the general procedure B. The title compound was prepared from PhBr (3 equiv) and  $\text{Na}_2\text{CO}_3$  (5 equiv). The reaction mixture was stirred at 130°C for 18h. The product was purified by flash chromatography (1:20 EA/PE) as yellow oil (65 mg, 53%). The *dr* value is 2.2:1 analysis by GCMS.

$^1\text{H}$  NMR (400 MHz,  $\text{CDCl}_3$ )  $\delta$  9.71 (s, 1H), 8.78-8.73 (m, 2H), 8.15 (d,  $J = 8.2$  Hz, 1H), 7.52-7.44 (m, 3H), 7.22-7.05 (m, 9H), 3.55 (d,  $J = 10.8$  Hz, 1H), 2.68-2.46 (m, 3H), 2.24 (d,  $J = 19.7$  Hz, 2H), 2.02-1.91 (m, 1H), 1.58-1.44 (m, 1H), 1.03-0.80 (m, 1H), 0.94 (d,  $J = 6.2$  Hz, 3H).

$^{13}\text{C}$  NMR (100 MHz,  $\text{CDCl}_3$ )  $\delta$  171.9, 148.2, 144.5, 141.6, 138.4, 136.5, 135.6, 134.6, 129.7, 129.4, 129.3, 128.7, 128.6, 128.5, 128.4, 128.1, 128.0(2), 128.0, 127.9, 127.8, 127.6, 127.5, 127.4, 126.6, 126.2, 121.7, 121.4, 116.4, 59.0, 36.1, 35.9, 31.0, 21.1, 18.2.

HRMS (ESI): Calcd for  $\text{C}_{28}\text{H}_{28}\text{N}_2\text{O}$   $[\text{M}+\text{H}]^+$ : 409.2280, Found: 409.2282.

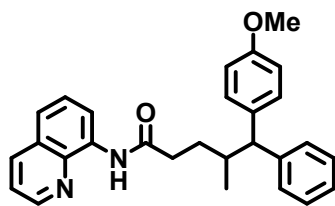

**5-(4-Methoxyphenyl)-4-methyl-5-phenyl-N-(quinolin-8-yl)pentanamide (P114).**

According to the general procedure B. The title compound was prepared from PhBr (3 equiv) and Na<sub>2</sub>CO<sub>3</sub> (5 equiv). The reaction mixture was stirred at 130°C for 18h. The product was purified by flash chromatography (1:20 EA/PE) as yellow oil (87 mg, 68%). The *dr* value is 2.9:1 analysis by GC.

<sup>1</sup>H NMR (400 MHz, CDCl<sub>3</sub>) δ 9.63 (s, 1H), 8.70-8.65 (m, 2H), 8.06-8.04 (m, 1H), 7.45-7.33 (m, 3H), 7.24-7.00 (m, 7H), 6.72-6.66 (m, 2H), 3.65-3.47 (m, 3H), 3.45 (dd, *J* = 10.7Hz, 3.4Hz, 1H), 2.57-2.35 (m, 3H), 1.94-1.84 (m, 1H), 1.48-1.39 (m, 1H), 0.87-0.84 (m, 3H).

<sup>13</sup>C NMR (100 MHz, CDCl<sub>3</sub>) δ 171.8, 157.9, 157.8, 148.1, 144.9, 144.5, 138.3, 136.7, 136.4, 134.6, 129.0, 128.9, 128.6, 128.5, 128.0, 127.9, 127.5, 126.1, 126.0, 121.6, 121.3, 116.4, 114.0, 113.9, 58.5, 58.4, 55.2, 55.1, 36.2, 35.8, 30.9, 18.2, 18.1.

HRMS (ESI): Calcd for C<sub>28</sub>H<sub>28</sub>N<sub>2</sub>O<sub>2</sub> [M+H]<sup>+</sup>: 425.2229, Found: 425.2227.

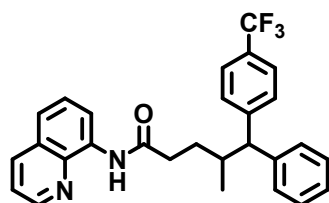

**4-Methyl-5-phenyl-N-(quinolin-8-yl)-5-(4-(trifluoromethyl)phenyl)pentanamide (P115).**

According to the general procedure B. The title compound was prepared from PhBr (3 equiv) and Na<sub>2</sub>CO<sub>3</sub> (5 equiv). The reaction mixture was stirred at 130°C for 18h. The product was purified by flash chromatography (1:20 EA/PE) as yellow oil (83 mg, 60%). The *dr* value is 2.5:1 analysis by GC.

<sup>1</sup>H NMR (400 MHz, CDCl<sub>3</sub>) δ 9.65 (s, 1H), 8.83-8.47 (m, 2H), 8.09 (dd, *J* = 8.3Hz, 1.7Hz, 1H), 7.48-7.32 (m, 7H), 7.24-7.14 (m, 4H), 7.07-7.03 (m, 1H), 3.58 (d, *J* = 10.8Hz, 1H), 2.56-2.43 (m, 3H), 2.01-1.85 (m, 1H), 1.53-1.45 (m, 1H), 0.86 (d, *J* = 6.5Hz, 3H).

$^{13}\text{C}$  NMR (100 MHz,  $\text{CDCl}_3$ )  $\delta$  171.6, 148.7, 148.2, 143.1, 138.4, 136.5, 134.5, 128.5, 128.9, 128.1, 128.0, 127.5, 126.7, 125.7, 125.6(3), 125.6, 125.5, 125.4, 121.7, 121.5, 116.5, 59.3, 35.9, 35.7, 30.7, 18.1.

HRMS (ESI): Calcd for  $\text{C}_{28}\text{H}_{25}\text{F}_3\text{N}_2\text{O}$   $[\text{M}+\text{H}]^+$ : 463.1997, Found: 463.1995.

## VI. Amplification reaction and drug synthesis

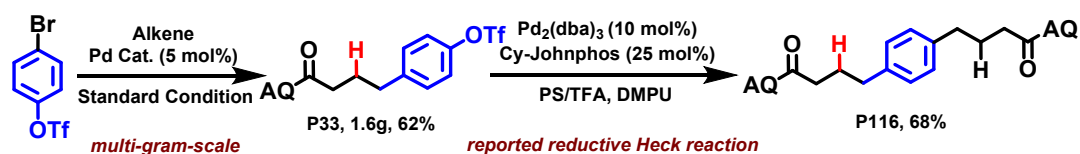

**Scheme S1.**

*General Procedure:* In an argon atmosphere, a dry 500-mL Schlenk tube containing a magnetic stirbar was charged with  $[\text{PdCl}(\text{C}_3\text{H}_5)]_2$  (5 mol%, 0.114 g, 0.3 mmol), cataCXium®PCy (10 mol%, 0.204 g, 0.6 mmol), alkenes S2 (1 equiv, 1.27 g, 6 mmol), LiOAc (3 equiv, 18 mmol, 1.2 g), 4-bromophenyl triflate (1.5 equiv, 9 mmol, 2.74 g), dry 2,3-butanediol (100 mL), cyanoacetic acid (3 equiv, 18 mmol, 1.536 g) and  $\text{H}_2\text{O}$  (20 equiv, 1.2 mmol, 2.2 mL). The tube was capped tightly and the mixture was vigorously stirred in a *pre*-warmed 130°C oil bath. After alkenes was almost fully consumed (monitored by GCMS), the reaction mixture was concentrated on a rotary evaporator and then distilled under vacuum and the resulting residue was directly subjected to silica gel flash chromatography (1:20 EA/PE), **P33** was obtained as yellow oil (1.62 g, 62%).

In an argon atmosphere, a dry 25-mL Schlenk tube containing a magnetic stirbar was charged with  $\text{Pd}_2(\text{dba})_3$  (10 mol%, 27.6 mg, 0.03 mmol), Cy-Johnphos (25 mol%, 29.3 mg, 0.075 mmol), alkenes S2 (1 equiv, 0.3 mmol, 63.6 mg), Proton Sponge (3 equiv, 0.9 mmol, 193 mg), **P33** (1.5 equiv, 0.45 mmol, 197.2 mg), dry DMPU (6 mL) and trifluoroacetic acid (3 equiv, 0.9 mmol, 75  $\mu\text{L}$ ). The tube was capped tightly and the mixture was vigorously stirred in a *pre*-warmed 130°C oil bath. After alkenes was almost fully consumed (monitored by GCMS), the reaction mixture was concentrated on a rotary evaporator and then distilled under vacuum, the resulting residue was directly subjected to preparative TLC (15:1 PE/EtOAc), **P116** was got as yellow oil (103 mg, 68%).

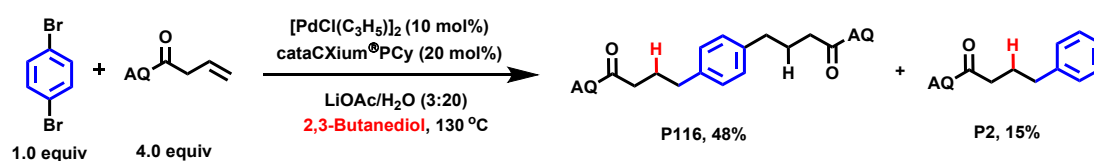

## Scheme S2.

*General Procedure A* : In an argon atmosphere, a dry 25-mL Schlenk tube containing a magnetic stirbar was charged with  $[\text{PdCl}(\text{C}_3\text{H}_5)]_2$  (10 mol%, 11.4 mg, 0.03 mmol), cataCXium®PCy (20 mol%, 20.4 mg, 0.02 mmol), alkenes S2 (4 equiv, 1.2 mmol), LiOAc (3 equiv, 0.9 mmol, 60 mg), 1,4-dibromobenzene (1.0 equiv, 0.3 mmol), dry 2,3-butanediol (3 mL) and  $\text{H}_2\text{O}$  (20 equiv, 6 mmol, 108  $\mu\text{L}$ ). The tube was capped tightly and the mixture was vigorously stirred in a *pre*-warmed 130°C oil bath. After alkenes was almost fully consumed (monitored by GCMS), the reaction mixture was concentrated on a rotary evaporator and then distilled under vacuum, the resulting residue was directly subjected to preparative TLC (15:1 PE/EtOAc), **P116** was got in 48% yield, 15% yield of byproduct **P2** was also observed due to the debromination.

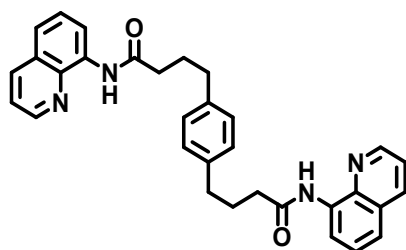

### 4,4'-(1,4-Phenylene)bis(*N*-(quinolin-8-yl)butanamide) (**P116**)

$^1\text{H}$  NMR (400 MHz,  $\text{CDCl}_3$ )  $\delta$  9.79 (s, 2H), 9.03–8.75 (m, 4H), 8.15 (dd,  $J = 8.2\text{Hz}$ , 1.7Hz, 2H), 7.55–7.48 (m, 4H), 7.45–7.42 (m, 2H), 7.18 (s, 4H), 2.74 (t,  $J = 7.5\text{Hz}$ , 4H), 2.58 (t,  $J = 7.4\text{Hz}$ , 4H), 2.19–2.11 (m, 4H).

$^{13}\text{C}$  NMR (100 MHz,  $\text{CDCl}_3$ )  $\delta$  171.5, 148.1, 139.1, 138.3, 136.4, 134.5, 128.7, 127.9, 127.4, 121.6, 121.4, 116.4, 37.4, 34.8, 27.1.

HRMS (ESI): Calcd for  $\text{C}_{32}\text{H}_{30}\text{N}_4\text{O}_2$   $[\text{M}+\text{H}]^+$ : 503.4427, Found: 503.4426.

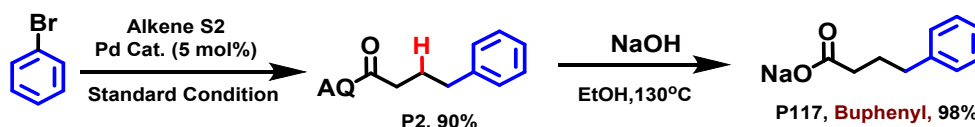

## Scheme S3.

*General Procedure:* In an argon atmosphere, a dry 50-mL Schlenk tube containing a magnetic stirbar was charged with  $[\text{PdCl}(\text{C}_3\text{H}_5)]_2$  (5 mol%, 19 mg, 0.05 mmol),



cataCXium®PCy (10 mol%, 34 mg, 0.1 mmol), alkenes (1 equiv, 1 mmol, 212 mg), LiOAc (3 equiv, 3 mmol, 200 mg), bromobenzene (1.5 equiv, 1.5 mmol, 170  $\mu$ L), dry 2,3-butanediol (10 mL) and H<sub>2</sub>O (20 equiv, 20 mmol, 0.36 mL). The tube was capped tightly and the mixture was vigorously stirred in a *pre*-warmed 130°C oil bath. After alkenes was almost fully consumed (monitored by GCMS), the reaction mixture was concentrated on a rotary evaporator and then distilled under vacuum, the resulting residue was directly subjected to preparative TLC (30:1 PE/EtOAc), **P2** was got in 90% yield (261 mg).

*The 8-aminoquinoline directing group was removed by adapting a literature procedure.<sup>2</sup>* **P2** (261 mg, 0.9 mmol, 1 equiv) and NaOH (0.54 g, 13.5 mmol, 2 equiv) were suspended in EtOH (10 mL) in a capped vial and heated at 130 °C for 14h. The reaction mixture was then transferred to a separation funnel and diluted with 1 M aqueous NaOH (1.5 mL) and CH<sub>2</sub>Cl<sub>2</sub> (3 mL). The aqueous alkaline layer was collected, and the organic layer was extracted with 1 M aqueous NaOH (3  $\times$  2 mL). **P117** was got in 98% yield (164 mg).

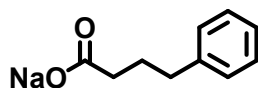

**Sodium 4-phenylbutanoate (P117)**

<sup>1</sup>H NMR (400 MHz, DMSO-*d*<sub>6</sub>)  $\delta$  7.66-6.75 (m, 5H), 2.79-2.36 (m, 2H), 2.06 (t, *J* = 7.4Hz, 2H), 1.75-1.71 (m, 2H).

<sup>13</sup>C NMR (100 MHz, DMSO-*d*<sub>6</sub>)  $\delta$  142.8, 128.7, 128.6, 126.0, 36.34, 35.5, 28.0.

HRMS (ESI): Calcd for C<sub>10</sub>H<sub>11</sub>NaO<sub>2</sub> [M+H]<sup>+</sup>: 187.0735, Found: 187.0759.

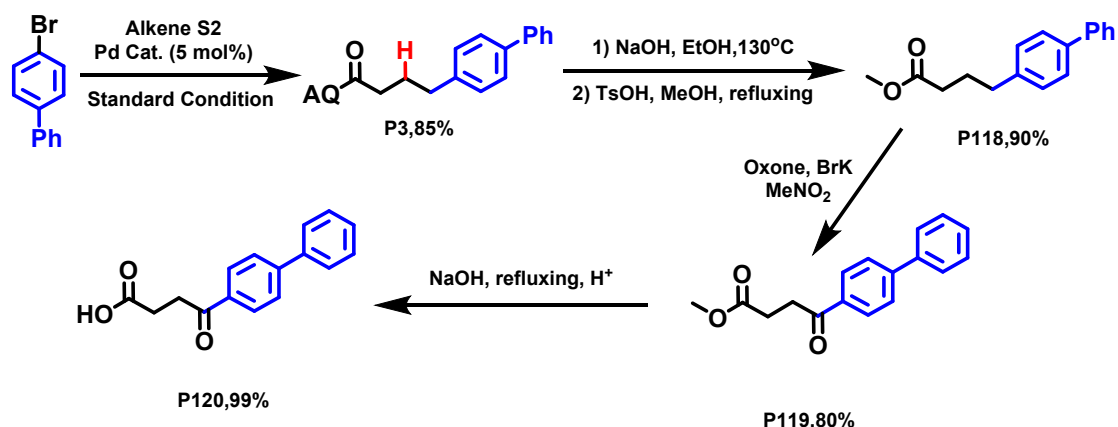

**Scheme S4.**

*General Procedure:* In an argon atmosphere, a dry 50-mL Schlenk tube containing a magnetic stirbar was charged with  $[\text{PdCl}(\text{C}_3\text{H}_5)]_2$  (5 mol%, 19 mg, 0.05 mmol), cat aCXium@PCy (10 mol%, 34 mg, 0.1 mmol), alkenes S2 (1 equiv, 1 mmol, 212 mg), LiOAc (3 equiv, 3 mmol, 200 mg), 4-bromobiphenyl (1.5 equiv, 1.5 mmol, 0.35 g), dry 2,3-butanediol (10 mL) and  $\text{H}_2\text{O}$  (20 equiv, 20 mmol, 0.36 mL). The tube was capped tightly and the mixture was vigorously stirred in a *pre*-warmed  $130^\circ\text{C}$  oil bath. After alkenes was almost fully consumed (monitored by GCMS), the reaction mixture was concentrated on a rotary evaporator and then distilled under vacuum, the resulting residue was directly subjected to preparative TLC (30:1 PE/EtOAc), **P3** was obtained in 85% yield (311mg).

The 8-aminoquinoline directing group was removed by adapting a literature procedure.<sup>2</sup> **P3** (311 mg, 0.85 mmol, 1 equiv) and NaOH (0.51 g, 12.75 mmol, 2 equiv) were suspended in EtOH (9.5 mL) in a capped vial and heated at  $130^\circ\text{C}$  for 14h. The reaction was then transferred to a separation funnel and diluted with 1 M aqueous NaOH (1.3 mL) and  $\text{CH}_2\text{Cl}_2$  (3 mL). The aqueous alkaline layer was collected, and the organic layer was extracted with 1 M aqueous NaOH ( $3 \times 2$  mL). Product was got in 96% yield. A mixture of product and TsOH (42 mg, 0.24 mmol, 3 mol%) was heated to reflux in MeOH (10 mL) for 6h. The reaction mixture was concentrated on a rotary evaporator and then distilled under reduced pressure to afford the product **P118** in 90% yield.

The oxidation of esters is based on the reported literature.<sup>3</sup> To the solution of **P118**

(76.3 mg, 0.3 mmol) and Oxone (553.3 mg, 0.9 mmol) in MeNO<sub>2</sub> (4.5 mL) was added KBr (17.9 mg, 0.15 mmol) at room temperature, then stirred at 50°C for 24h. Saturated Na<sub>2</sub>SO<sub>3</sub> aqueous solution (10 mL) was added to the reaction mixture, then extracted with EtOAc (15 mL × 3). The combined extracts were washed by brine (10 mL) and dried over Na<sub>2</sub>SO<sub>4</sub>. The organic phase was concentrated under reduced pressure and the crude product was purified by silica gel column chromatography (hexane/EtOAc = 20/1), **P119** was obtained as yellow oil (64 mg, 80%).

**P119** (54mg, 0.2mmol, 1equiv) and NaOH (0.16 g, 4 mmol, 20 equiv) were suspended in H<sub>2</sub>O (10 mL) in a capped vial and heated at 100°C for 2h. The reaction mixture was then transferred to a separation funnel and diluted with 1 M aqueous HCl (1.3 mL) and extracted with CH<sub>2</sub>Cl<sub>2</sub> (3 × 2 mL) to afford **P120** (51 mg, 99%).

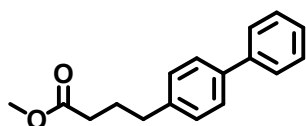

**Methyl 4-([1,1'-biphenyl]-4-yl)butanoate (P118)**

<sup>1</sup>H NMR (400 MHz, CDCl<sub>3</sub>) δ 7.50-7.47 (m, 2H), 7.43-7.41 (m, 2H), 7.35-7.31 (m, 2H), 7.26-7.23 (m, 1H), 7.16-7.14 (m, 2H), 3.57 (s, 3H), 2.59 (t, *J* = 7.6Hz, 2H), 2.27 (t, *J* = 7.5Hz, 2H), 1.90 (p, *J* = 7.6Hz, 2H).

<sup>13</sup>C NMR (100 MHz, CDCl<sub>3</sub>) δ 174.0, 141.1, 140.5, 139.0, 129.0, 128.8, 127.2, 127.1, 127.0, 51.6, 34.8, 33.4, 26.5.

HRMS (ESI): Calcd for C<sub>17</sub>H<sub>18</sub>O<sub>2</sub> [M+H]<sup>+</sup>: 255.1385, Found: 255.1384.

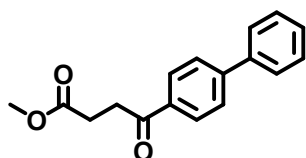

**Methyl 4-([1,1'-biphenyl]-4-yl)-4-oxobutanoate (P119)**

<sup>1</sup>H NMR (400 MHz, CDCl<sub>3</sub>) δ 8.06-8.04 (m, 2H), 7.70-7.61 (m, 4H), 7.49-7.46 (m, 2H), 7.40-7.38 (m, 1H), 3.71 (s, 3H), 3.35-3.32 (m, 2H), 2.81-2.77 (m, 2H).

HRMS (ESI): Calcd for C<sub>17</sub>H<sub>16</sub>O<sub>3</sub> [M+H]<sup>+</sup>: 269.1178, Found: 269.1181.

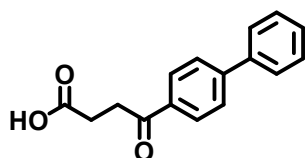

**4-([1,1'-Biphenyl]-4-yl)-4-oxobutanoic acid (P120).**

$^1\text{H}$  NMR (400 MHz,  $\text{DMSO-}d_6$ )  $\delta$  8.07 (d,  $J = 8.2$  Hz, 2H), 7.84 (d,  $J = 8.2$  Hz, 2H), 7.76 (d,  $J = 7.7$  Hz, 2H), 7.52 (t,  $J = 7.5$  Hz, 2H), 7.44 (t,  $J = 7.3$  Hz, 1H), 3.30-3.28 (m, 2H), 2.62-2.51 (m, 2H).

$^{13}\text{C}$  NMR (100 MHz,  $\text{DMSO-}d_6$ )  $\delta$  198.6, 174.3, 145.0, 139.4, 135.7, 129.6, 129.1, 128.9, 127.5, 127.4, 33.6, 28.4.

HRMS (ESI): Calcd for  $\text{C}_{16}\text{H}_{14}\text{O}_3$   $[\text{M}+\text{H}]^+$ : 255.1021, Found: 255.1021.

**VII. Mechanistic Study**

**Figure S3.** Monitoring of Reaction Progress for Reductive Heck Reaction. (a) Comparison of Reaction Rates for the Formation of **P4** in Different Solvents. (b) Comparison of Conversion Rates of 4-*t*-BuPhBr in Different Solvents, Which Based on 1.5 equiv of ArBr.

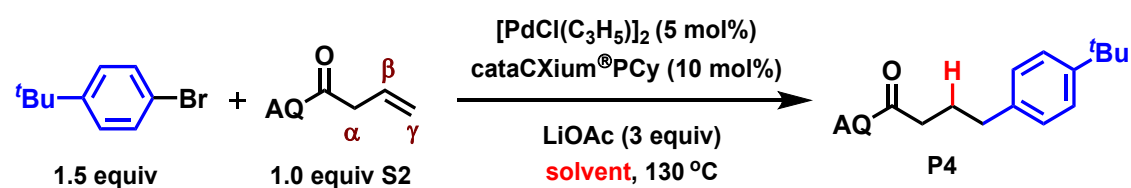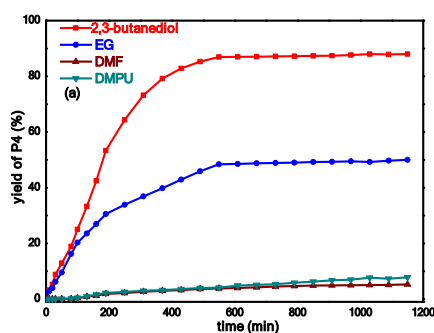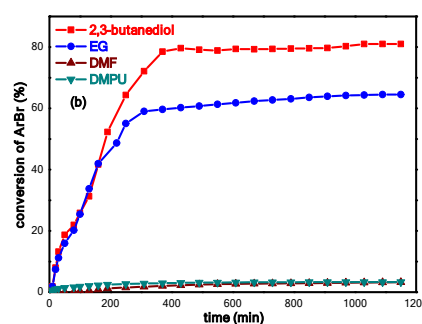

**Comment:** In order to gain more insight into the possible mechanism, we firstly detected the progress of reductive Heck reaction of 4-*t*-BuPhBr with alkene **S2** by GC analysis. Monitoring of the reaction with 2,3-butanediol, ethylene glycol (EG), 1,3-dimethyl-propyleneurea (DMPU) and DMF as solvent respectively demonstrated that the diol solvent dramatically increased the rates of the reductive Heck reaction, while almost no desired reaction occurred in *nonprotic* solvents (DMPU and DMF)

(Figure S3a). Despite that EG acting as hydrogen-bond donor has already been proved to efficiently promote halide dissociation from neutral arylpalladium complexes to access cationic reductive Heck-type pathways, homologous 2,3-butanediol exhibited higher activity in our catalytic system, which indirectly supported 2,3-butanediol might play the role of halide abstracter via hydrogen-bonding effect. Moreover, EG has previously been demonstrated to facilitate oxidative addition in cationic Heck-type reactions of aryl halides, we wonder whether homologous 2,3-butanediol could also performed similarly in our proposed cationic reductive Heck reaction. Comparison of the conversion rates of 4-*t*BuPhBr in different solvents revealed that parallel reactivity of aryl bromide was presented in EG and 2,3-butanediol solvent, but no or little oxidative addition took place in *nonprotic* solvents (DMPU and DMF) (Figure S3b). Thus, by comparing the activity of 2,3-butanediol with the known halide abstracter EG, we gained indirect evidence suggesting that 2,3-butanediol was likely acted as hydrogen-bond donor to promote the oxidative addition and halide dissociation steps for accessing cationic reductive Heck pathways.

**Table S9** Ligand Effect on Asymmetric Intermolecular Reductive Heck Reaction.

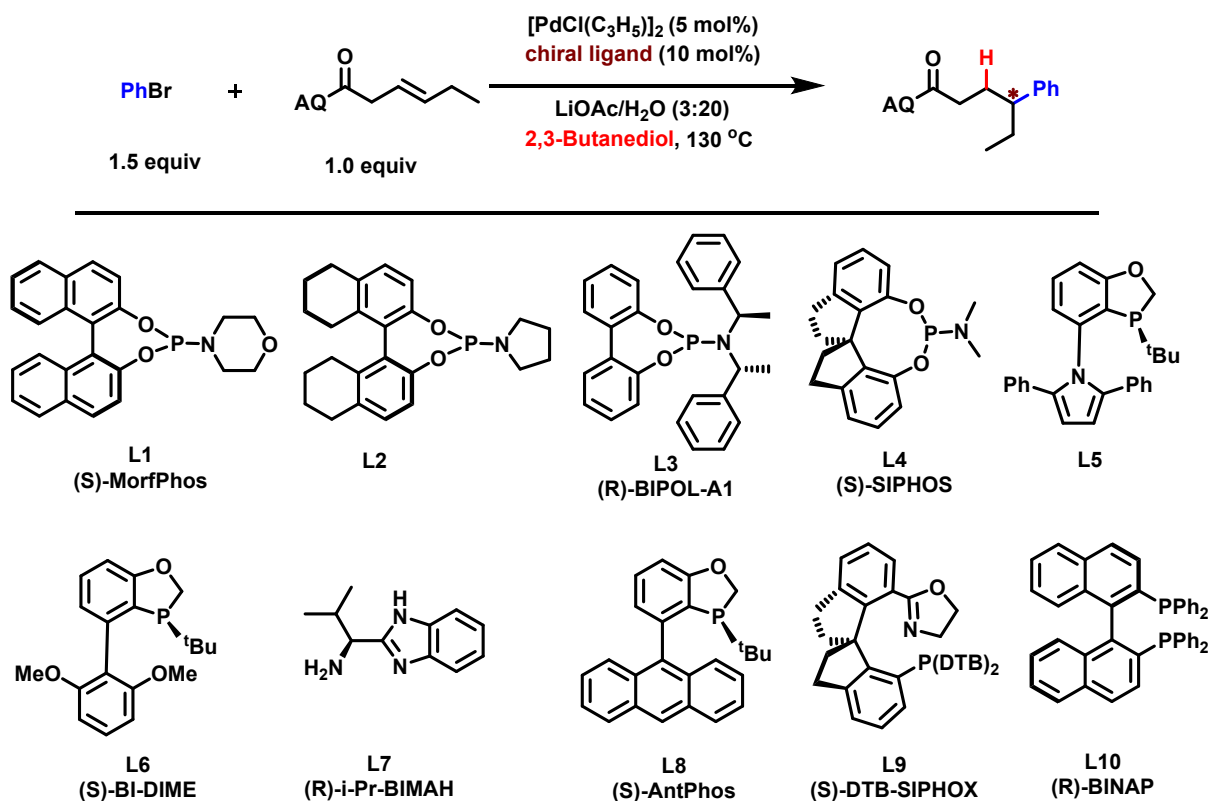

| Entry | ligand | ArBr/Conversion (%) | Alkene/Conversion (%) | Yield (%) | ee% |
|-------|--------|---------------------|-----------------------|-----------|-----|
| 1     | L1     | 100                 | 92                    | 80        | 0   |
| 2     | L2     | 99                  | 78                    | 65        | 0   |
| 3     | L3     | 99                  | 90                    | 76        | 0   |
| 4     | L4     | 98                  | 90                    | 69        | 0   |
| 5     | L5     | 93                  | 87                    | 62        | 0   |
| 6     | L6     | 98                  | 98                    | 55        | 0   |
| 7     | L7     | 100                 | 98                    | 42        | 0   |
| 8     | L8     | 96                  | 100                   | 75        | 0   |
| 9     | L9     | 99                  | 98                    | 70        | 0   |
| 10    | L10    | 95                  | 68                    | 16        | 0   |

**Study on Generation of Hydride Species:**

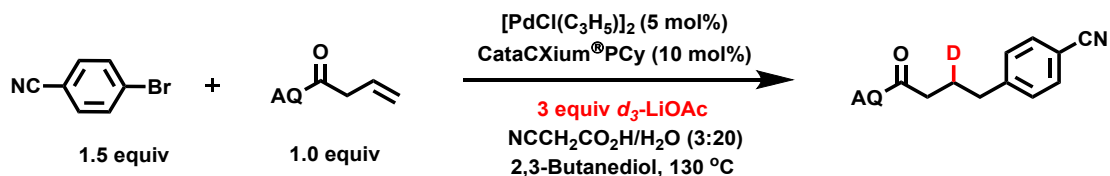

#### Scheme S5.

*General Procedure:* In an argon atmosphere, a dry 10-mL Schlenk tube containing a magnetic stirbar was charged with  $[\text{PdCl}(\text{C}_3\text{H}_5)]_2$  (5 mol%, 1.9 mg, 0.005 mmol), cataCXium®PCy (10 mol%, 3.4 mg, 0.01 mmol), alkenes S2 (1 equiv, 0.1 mmol, 21.2 mg),  $d_3\text{-LiOAc}$  (3 equiv, 0.3 mmol, 20 mg), 4-bromobenzonitrile (1.5 equiv, 0.15 mmol, 27 mg), dry 2,3-butanediol (1.0 mL), cyanoacetic acid (3 equiv, 0.3 mmol, 25.6 mg) and  $\text{H}_2\text{O}$  (20 equiv, 2 mmol, 36 uL). The tube was capped tightly and the mixture was vigorously stirred in a *pre*-warmed 130°C oil bath. After alkenes was almost fully consumed (monitored by GCMS), the reaction mixture was concentrated on a rotary evaporator and then distilled under vacuum, the resulting residue was directly subjected to preparative TLC (10:1 PE/EtOAc), no D-product was got in 72% yield.

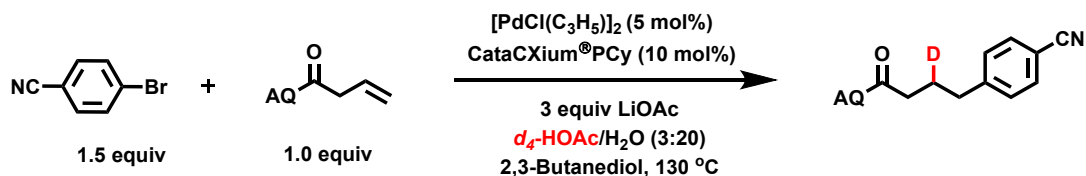

#### Scheme S6.

*General Procedure:* In an argon atmosphere, a dry 10-mL Schlenk tube containing a magnetic stirbar was charged with  $[\text{PdCl}(\text{C}_3\text{H}_5)]_2$  (5 mol%, 1.9 mg, 0.005 mmol), cataCXium®PCy (10 mol%, 3.4 mg, 0.01 mmol), alkenes S2 (1 equiv, 0.1 mmol, 21.2 mg), LiOAc (3 equiv, 0.3 mmol, 20 mg), 4-bromobenzonitrile (1.5 equiv, 0.15 mmol, 27 mg), dry 2,3-butanediol (1.0 mL),  $d_4\text{-HOAc}$  (3 equiv, 0.3 mmol, 18 uL) and  $\text{H}_2\text{O}$  (20 equiv, 2 mmol, 36 uL). The tube was capped tightly and the mixture was vigorously stirred in a *pre*-warmed 130°C oil bath. After alkenes was almost fully consumed (monitored by GCMS), the reaction mixture was concentrated on a rotary evaporator and then distilled under vacuum, the resulting residue was directly subjected to preparative TLC (10:1 PE/EA), no D-product was got in 80% yield.

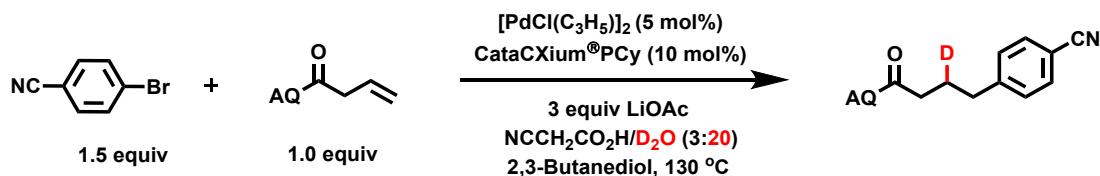

#### Scheme S7.

*General Procedure:* In an argon atmosphere, a dry 10-mL Schlenk tube containing a magnetic stirbar was charged with  $[\text{PdCl}(\text{C}_3\text{H}_5)]_2$  (5 mol%, 1.9 mg, 0.005 mmol), cataCXium®PCy (10 mol%, 3.4 mg, 0.01 mmol), alkenes S2 (1 equiv, 0.1 mmol, 21.2 mg), LiOAc (3 equiv, 0.3 mmol, 20 mg), 4-bromobenzonitrile (1.5 equiv, 0.15 mmol, 27 mg), dry 2,3-butanediol (1.0 mL), cyanoacetic acid (3 equiv, 0.3 mmol, 25.6 mg) and  $\text{D}_2\text{O}$  (20 equiv, 2 mmol, 36  $\mu\text{L}$ ). The tube was capped tightly and the mixture was vigorously stirred in a *pre*-warmed 130°C oil bath. After 12h, 10  $\mu\text{L}$  dodecane was added in the tube. After alkenes was almost fully consumed (monitored by GCMS), the reaction mixture was concentrated on a rotary evaporator and then distilled under reduced pressure, the resulting residue was directly subjected to preparative TLC (10:1 PE/EA), no D-product was got in 73% yield.

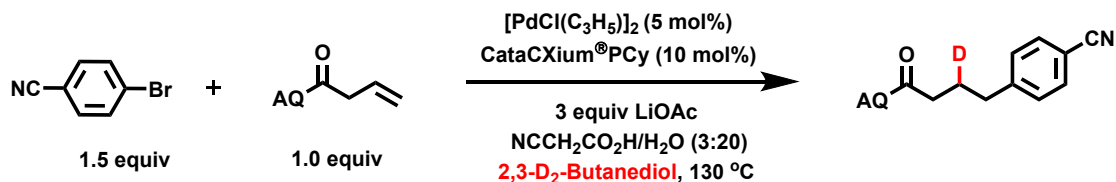

#### Scheme S8.

*General Procedure:* In an argon atmosphere, a dry 10-mL Schlenk tube containing a magnetic stirbar was charged with  $[\text{PdCl}(\text{C}_3\text{H}_5)]_2$  (5 mol%, 1.9 mg, 0.005 mmol), cataCXium®PCy (10 mol%, 3.4 mg, 0.01 mmol), alkenes S2 (1 equiv, 0.1 mmol, 21.2 mg), LiOAc (3 equiv, 0.3 mmol, 20 mg), 4-bromobenzonitrile (1.5 equiv, 0.15 mmol, 27 mg), dry 2,3- $\text{D}_2$ -2,3-Butanediol<sup>4</sup> (1.0 mL), cyanoacetic acid (3 equiv, 0.3 mmol, 25.6 mg) and  $\text{H}_2\text{O}$  (20 equiv, 2 mmol, 36  $\mu\text{L}$ ). The tube was capped tightly and the mixture was vigorously stirred in a *pre*-warmed 130°C oil bath. After alkenes was almost fully consumed (monitored by GCMS), the reaction mixture was concentrated on a rotary evaporator and then distilled under vacuum, the resulting residue was directly subjected to preparative TLC (10:1 PE/EA), D-product was got in 42% yield.



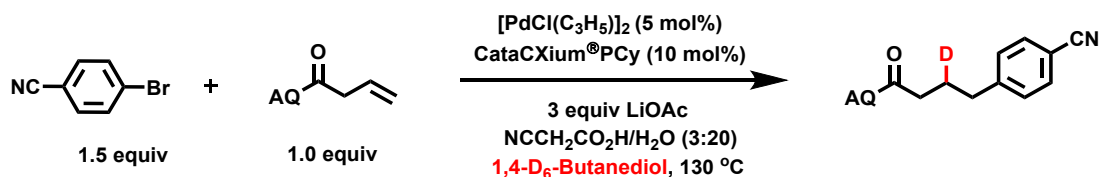

#### Scheme S9.

*General Procedure:* In an argon atmosphere, a dry 10-mL Schlenk tube containing a magnetic stirbar was charged with  $[\text{PdCl}(\text{C}_3\text{H}_5)]_2$  (5 mol%, 1.9 mg, 0.005 mmol), cataCXium®PCy (10 mol%, 3.4 mg, 0.01 mmol), alkenes S2 (1 equiv, 0.1 mmol, 21.2 mg), LiOAc (3 equiv, 0.3 mmol, 20 mg), 4-bromobenzonitrile (1.5 equiv, 0.15 mmol, 27 mg), dry 1,4- $\text{D}_6$ -2,3-butanediol<sup>4</sup> (1.0 mL), cyanoacetic acid (3 equiv, 0.3 mmol, 25.6 mg) and  $\text{H}_2\text{O}$  (20 equiv, 2 mmol, 36  $\mu\text{L}$ ). The tube was capped tightly and the mixture was vigorously stirred in a *pre*-warmed 130°C oil bath. After alkenes was almost fully consumed (monitored by GCMS), the reaction mixture was concentrated on a rotary evaporator and then distilled under vacuum, the resulting residue was directly subjected to preparative TLC (10:1 PE/EA), no D-product was got in 25% yield.

## VIII. Reference

- (1) (a) Wang, C. ; Xiao, G. ; Guo, T. ; Ding, Y. ; Wu, X. ; Loh, T-P. Palladium-Catalyzed Regiocontrollable Reductive Heck Reaction of Unactivated Aliphatic Alkenes. *J. Am. Chem. Soc.* **2018**, *140*, 9332-9336. (b) Shim, S. Y.; Cho, S. M. ; Venkateswarlu, A.; Ryu, D. H. Catalytic Enantioselective Synthesis of 2,5-Dihydrooxepines. *Angew. Chem. Int. Ed.* **2017**, *56*, 8663-8666. (c) Alamillo-Ferrer, C.; Karabourniotis-Sotti, M.; Kennedy, A. R.; Campbell, M.; Tomkinson, N. C. O. Alkene Dioxygenation with Malonoyl Peroxides: Synthesis of  $\gamma$ -Lactones, Isobenzofuranones, and Tetrahydrofurans. *Org. Lett.* **2016**, *18*, 3102-3105. (d) Grünanger, C. U.; Breit, B. Branched-Regioselective Hydroformylation with Catalytic Amounts of a Reversibly Bound Directing Group. *Angew. Chem. Int. Ed.* **2008**, *47*, 7346-7349. (e) Liu, M.; Yang, P.; Karunananda, M. K.; Wang, Y.; Liu, P.; Engle, K. M. C (alkenyl)-H Activation via Six-Membered Palladacycles: Catalytic 1,3-Diene Synthesis. *J. Am. Chem. Soc.* **2018**, *140*, 5805-5813. (f) Wang, Z.; He, Z.; Zhang, L.; Huang, Y. Iridium-Catalyzed Aerobic  $\alpha$ ,  $\beta$ -Dehydrogenation of  $\gamma,\delta$ -Unsaturated Amides and Acids: Activation of Both  $\alpha$ - and  $\beta$ -C-H bonds through an Allyl-Iridium Intermediate. *J. Am. Chem. Soc.* **2018**, *140*, 735-740.
- (2) Verho, O.; Maetani, M.; Melillo, B.; Zoller, J.; Schreiber, S. L. Stereospecific Palladium-catalyzed C-H arylation of pyroglutamic acid derivatives at the C3 position enabled by 8-aminoquinoline as a directing group. *Org. Lett.* **2017**, *19*, 4424-4427.
- (3) Moriyama, K.; Takemura, M.; Togo, H. Direct and Selective Benzylic Oxidation of Alkylarenes via C-H Abstraction Using Alkali Metal Bromides. *Org. Lett.* **2012**, *14*(9), 2414-2417.
- (4) Hardacre, C.; Migaud, M. E.; Ness, K. A. Controlling chlorination versus cyclosulfonation of cis-diols using ionic liquid solvents. *New J. Chem.* **2012**, *36*, 2316-2321.
